# Supplementary material for: Sequences of Reverse Transcribed Brain DNA Are Modified by Learning
Source: Front Mol Neurosci. 2020 Apr 28;13:57. doi: 10.3389/fnmol.2020.00057 (PMC7199793; doi:10.3389/fnmol.2020.00057)
Supplement: Supplementary file 1 [file Table_1.xlsx]

## Sheet: Significant_Consensus_regions_C
seqnames	start	end	width	S50279	S50274	S50284	S50289	seqID	black_flag	feature	start_position	end_position	feature_strand	insideFeature	distancetoFeature	shortestDistance	fromOverlappingOrNearest	symbol
chr1	5868561	5877408	8848	2	3	3	1	seq_380	FALSE	226304	5913707	5917398	-	downstream	48837	36299	NearestLocation	Npbwr1
chr1	7348292	7360059	11768	1	2	2	4	seq_564	FALSE	319263	7088920	7173628	+	downstream	259372	174664	NearestLocation	Pcmtd1
chr1	9561722	9569626	7905	2	0	4	2	seq_826	FALSE	76187	9547948	9580673	+	inside	13774	11047	NearestLocation	Adhfe1
chr1	10711150	10723318	12169	1	2	3	3	seq_977	FALSE	329093	10324720	10719945	-	overlapStart	8795	3373	NearestLocation	Cpa6
chr1	11991884	12003392	11509	0	1	2	6	seq_1152	FALSE	102465961	12425986	12426106	+	upstream	-434102	422594	NearestLocation	Mir6341
chr1	15397228	15405834	8607	0	2	3	3	seq_1617	FALSE	98741	15287254	15723750	+	inside	109974	109974	NearestLocation	Kcnb2
chr1	18212973	18221286	8314	3	2	4	1	seq_1990	FALSE	654454	18210053	18223564	-	inside	10591	2278	NearestLocation	Defb44-ps
chr1	21388722	21399506	10785	3	2	2	2	seq_2399	FALSE	98582	21383556	21386373	+	downstream	5166	2349	NearestLocation	Khdc1b
chr1	23962496	23978799	16304	4	1	2	4	seq_2741	FALSE	68002	23995939	24005656	-	downstream	43160	17140	NearestLocation	Sdhaf4
chr1	24610806	24614400	3595	0	20	10	0	seq_2818	TRUE	12823	24261890	24587472	-	upstream	-23334	23334	NearestLocation	Col19a1
chr1	26220296	26230739	10444	1	0	4	4	seq_3025	FALSE	210933	25067476	25829707	-	upstream	-390589	390589	NearestLocation	Adgrb3
chr1	26680642	26689276	8635	4	1	3	1	seq_3075	TRUE	210940	26681814	26687460	-	includeFeature	6818	1172	NearestLocation	4931408C20Rik
chr1	30719888	30733785	13898	1	2	3	3	seq_3561	FALSE	213109	30802339	30873921	-	downstream	154033	68554	NearestLocation	Phf3
chr1	34809660	34817693	8034	2	1	2	3	seq_4106	FALSE	214469	34813219	34843065	-	overlapEnd	33405	3559	NearestLocation	Fam168b
chr1	35607672	35615811	8140	2	1	3	2	seq_4214	FALSE	50785	36068400	36106446	+	upstream	-460728	452589	NearestLocation	Hs6st1
chr1	35620032	35632704	12673	4	2	2	3	seq_4215	FALSE	50785	36068400	36106446	+	upstream	-448368	435696	NearestLocation	Hs6st1
chr1	35903004	35916088	13085	3	0	5	3	seq_4257	FALSE	50785	36068400	36106446	+	upstream	-165396	152312	NearestLocation	Hs6st1
chr1	36044186	36057401	13216	2	3	0	3	seq_4275	FALSE	50785	36068400	36106446	+	upstream	-24214	10999	NearestLocation	Hs6st1
chr1	36263518	36270388	6871	1	5	0	2	seq_4304	FALSE	214854	36264597	36274679	-	overlapEnd	11161	1079	NearestLocation	Neurl3
chr1	39645045	39657239	12195	3	1	3	1	seq_4770	FALSE	263764	39618406	39651474	-	overlapStart	6429	5765	NearestLocation	Creg2
chr1	40929683	40945368	15686	1	1	5	4	seq_4942	FALSE	381339	40805601	40856887	+	downstream	124082	72796	NearestLocation	Tmem182
chr1	41382863	41394076	11214	6	0	3	1	seq_4996	FALSE	74897	41167587	41181252	-	upstream	-201611	201611	NearestLocation	4930448I06Rik
chr1	43045744	43057590	11847	2	1	1	5	seq_5218	FALSE	73122	43047200	43098637	-	overlapEnd	52893	1456	NearestLocation	Tgfbrap1
chr1	48684698	48697887	13190	1	2	2	5	seq_5934	FALSE	442837	49244616	49340443	+	upstream	-559918	546729	NearestLocation	C230029F24Rik
chr1	54761718	54772594	10877	2	3	2	1	seq_6677	FALSE	329154	54645340	54926387	-	inside	164669	116378	NearestLocation	Ankrd44
chr1	55866283	55876141	9859	1	1	4	3	seq_6816	FALSE	329159	55931241	55972328	+	upstream	-64958	55100	NearestLocation	9130227L01Rik
chr1	56983179	56997170	13992	3	3	2	4	seq_6946	FALSE	212712	56793981	56978650	-	upstream	-4529	4529	NearestLocation	Satb2
chr1	57720892	57731684	10793	2	4	3	2	seq_7053	FALSE	67198	57774162	57948394	+	upstream	-53270	42478	NearestLocation	Spats2l
chr1	58045863	58055112	9250	1	2	3	3	seq_7105	FALSE	11761	58029931	58106413	+	inside	15932	15932	NearestLocation	Aox1
chr1	59899723	59909873	10151	2	2	3	3	seq_7353	FALSE	72750	59913006	59985346	+	upstream	-13283	3133	NearestLocation	Fam117b
chr1	64406223	64419069	12847	3	2	2	1	seq_7959	FALSE	12912	64532645	64604548	+	upstream	-126422	113576	NearestLocation	Creb1
chr1	74424867	74439921	15055	2	2	1	6	seq_9202	FALSE	22349	74409376	74435559	+	overlapEnd	15491	4362	NearestLocation	Vil1
chr1	78211131	78222730	11600	1	3	4	4	seq_9694	FALSE	18505	78101267	78197134	-	upstream	-13997	13997	NearestLocation	Pax3
chr1	84127972	84139015	11044	2	0	4	3	seq_10435	FALSE	102465181	84218849	84218961	-	downstream	90989	79834	NearestLocation	Mir6353
chr1	85007485	85016288	8804	2	2	3	1	seq_10548	TRUE	71781	84905898	84935134	-	upstream	-72351	72351	NearestLocation	Slc16a14
chr1	85065115	85076436	11322	3	2	3	2	seq_10555	TRUE	381287	85083069	85109853	-	downstream	44738	6633	NearestLocation	A530032D15Rik
chr1	85083784	85097523	13740	3	2	4	5	seq_10557	TRUE	381287	85083069	85109853	-	inside	26069	715	NearestLocation	A530032D15Rik
chr1	85104516	85119475	14960	7	9	5	4	seq_10559	TRUE	381287	85083069	85109853	-	overlapStart	5337	5337	NearestLocation	A530032D15Rik
chr1	85179284	85189522	10239	3	2	2	3	seq_10569	TRUE	665378	85199613	85213786	+	upstream	-20329	10091	NearestLocation	Gm7609
chr1	85244010	85261015	17006	6	7	8	8	seq_10580	TRUE	620078	85112267	85270566	-	inside	26556	9551	NearestLocation	C130026I21Rik
chr1	85268381	85278030	9650	1	1	3	6	seq_10582	TRUE	620078	85112267	85270566	-	overlapStart	2185	2185	NearestLocation	C130026I21Rik
chr1	85324476	85334378	9903	2	3	4	4	seq_10589	TRUE	620078	85112267	85270566	-	upstream	-53910	53910	NearestLocation	C130026I21Rik
chr1	85338196	85347791	9596	5	3	4	2	seq_10590	TRUE	620078	85112267	85270566	-	upstream	-67630	67630	NearestLocation	C130026I21Rik
chr1	85499346	85509344	9999	3	6	0	4	seq_10600	TRUE	109032	85576899	85598817	-	downstream	99471	67555	NearestLocation	Sp110
chr1	85549399	85562437	13039	1	4	4	3	seq_10606	TRUE	109032	85576899	85598817	-	downstream	49418	14462	NearestLocation	Sp110
chr1	87761632	87775871	14240	1	6	0	4	seq_10888	FALSE	77040	87755870	87792428	+	inside	5762	5762	NearestLocation	Atg16l1
chr1	88211334	88254196	42863	19	22	32	27	seq_10943	TRUE	394436	88211959	88218997	+	includeFeature	-625	625	NearestLocation	Ugt1a1
chr1	88257012	88270738	13727	9	4	4	7	seq_10945	TRUE	381280	88262471	88277633	-	overlapEnd	20621	5459	NearestLocation	Hjurp
chr1	88271854	88291711	19858	9	6	6	10	seq_10946	TRUE	381280	88262471	88277633	-	overlapStart	5779	5779	NearestLocation	Hjurp
chr1	88293574	88311191	17618	9	4	9	10	seq_10947	TRUE	171382	88277661	88389293	+	inside	15913	15913	NearestLocation	Trpm8
chr1	89136824	89148640	11817	1	1	2	4	seq_11058	FALSE	98402	89070415	89155068	+	inside	66409	6428	NearestLocation	Sh3bp4
chr1	89473594	89484869	11276	1	1	3	3	seq_11100	FALSE	347722	89454806	89897617	+	inside	18788	18788	NearestLocation	Agap1
chr1	91198692	91210041	11350	1	2	4	2	seq_11354	FALSE	51801	91179822	91225196	+	inside	18870	15155	NearestLocation	Ramp1
chr1	92542923	92556516	13594	2	1	3	3	seq_11533	FALSE	259039	92573125	92574206	+	upstream	-30202	16609	NearestLocation	Olfr1413
chr1	93060625	93068875	8251	2	2	4	0	seq_11605	FALSE	16560	93015464	93101951	-	inside	41326	33076	NearestLocation	Kif1a
chr1	93671748	93682095	10348	2	2	3	3	seq_11692	FALSE	51800	93685660	93695764	+	upstream	-13912	3565	NearestLocation	Bok
chr1	94530294	94540121	9828	2	2	1	3	seq_11801	FALSE	74689	94797083	94802472	+	upstream	-266789	256962	NearestLocation	4930440C22Rik
chr1	97998508	98011697	13190	1	1	4	3	seq_12247	FALSE	78603	98031116	98047793	-	downstream	49285	19419	NearestLocation	B230216N24Rik
chr1	98190845	98201385	10541	2	2	2	2	seq_12269	FALSE	102634194	98173648	98190698	+	downstream	17197	147	NearestLocation	Gm29461
chr1	98719464	98727866	8403	3	1	1	3	seq_12331	FALSE	70866	98421124	98516991	+	downstream	298340	202473	NearestLocation	Slco6d1
chr1	99591129	99602428	11300	4	2	1	1	seq_12446	FALSE	241175	99772765	100485942	+	upstream	-181636	170337	NearestLocation	Cntnap5b
chr1	100673077	100681742	8666	1	4	3	1	seq_12592	FALSE	100504525	101155809	101175202	+	upstream	-482732	474067	NearestLocation	Gm20268
chr1	101688658	101698043	9386	1	3	2	2	seq_12712	FALSE	100504525	101155809	101175202	+	downstream	532849	513456	NearestLocation	Gm20268
chr1	102008903	102018941	10039	3	1	3	1	seq_12761	FALSE	100504525	101155809	101175202	+	downstream	853094	833701	NearestLocation	Gm20268
chr1	102188986	102196447	7462	3	1	3	1	seq_12784	FALSE	100504525	101155809	101175202	+	downstream	1033177	1013784	NearestLocation	Gm20268
chr1	105485441	105497792	12352	1	2	4	1	seq_13216	FALSE	320311	105276914	105356710	-	upstream	-128731	128731	NearestLocation	Rnf152
chr1	107157637	107166352	8716	0	2	2	4	seq_13439	FALSE	394252	107078167	107083506	-	upstream	-74131	74131	NearestLocation	Serpinb3d
chr1	110735751	110747997	12247	3	1	1	3	seq_13893	FALSE	227485	110888326	110977584	-	downstream	241833	140329	NearestLocation	Cdh19
chr1	112584162	112593322	9161	1	1	1	5	seq_14105	FALSE	319901	111858702	111864918	-	upstream	-719244	719244	NearestLocation	Dsel
chr1	113089533	113100607	11075	2	3	3	3	seq_14168	FALSE	319901	111858702	111864918	-	upstream	-1224615	1224615	NearestLocation	Dsel
chr1	115862797	115869482	6686	1	2	4	1	seq_14513	FALSE	636808	115684756	116587323	+	inside	178041	178041	NearestLocation	Cntnap5a
chr1	116207286	116214266	6981	4	0	3	1	seq_14559	FALSE	636808	115684756	116587323	+	inside	522530	373057	NearestLocation	Cntnap5a
chr1	117022354	117032957	10604	1	2	3	2	seq_14662	FALSE	22099	118294778	118311462	-	downstream	1289108	1261821	NearestLocation	Tsn
chr1	117424551	117439979	15429	4	2	2	3	seq_14716	FALSE	22099	118294778	118311462	-	downstream	886911	854799	NearestLocation	Tsn
chr1	117953105	117961891	8787	1	3	5	0	seq_14797	FALSE	22099	118294778	118311462	-	downstream	358357	332887	NearestLocation	Tsn
chr1	119003081	119014806	11726	3	1	2	3	seq_14943	FALSE	14633	118834132	119053619	-	inside	50538	38813	NearestLocation	Gli2
chr1	119229074	119237845	8772	2	4	2	1	seq_14974	FALSE	14633	118834132	119053619	-	upstream	-175455	175455	NearestLocation	Gli2
chr1	119300500	119309441	8942	2	2	3	1	seq_14984	FALSE	16324	119415465	119422248	-	downstream	121748	106024	NearestLocation	Inhbb
chr1	122441839	122451921	10083	3	1	3	1	seq_15427	FALSE	102638832	122205145	122252180	+	downstream	236694	189659	NearestLocation	Gm28590
chr1	125079246	125091860	12615	3	3	1	2	seq_15785	FALSE	269109	123321471	124846039	-	upstream	-233207	233207	NearestLocation	Dpp10
chr1	127474757	127483341	8585	2	1	4	1	seq_16098	FALSE	72160	127486546	127679548	-	downstream	204791	3205	NearestLocation	Tmem163
chr1	130809231	130820696	11466	0	3	3	3	seq_16556	FALSE	18703	130826684	130852249	+	upstream	-17453	5988	NearestLocation	Pigr
chr1	131058316	131063658	5343	1	0	2	5	seq_16589	FALSE	17164	131053700	131097826	-	inside	39510	4616	NearestLocation	Mapkapk2
chr1	134408498	134417409	8912	1	3	1	3	seq_17065	FALSE	72674	134415378	134433351	+	overlapStart	-6880	2031	NearestLocation	Adipor1
chr1	134987172	134998815	11644	0	4	2	3	seq_17134	FALSE	67196	134962565	134974162	+	downstream	24607	13010	NearestLocation	Ube2t
chr1	135376761	135387228	10468	2	2	1	3	seq_17190	FALSE	77552	135371057	135375237	-	upstream	-1524	1524	NearestLocation	Shisa4
chr1	141242917	141249924	7008	1	2	4	1	seq_17933	FALSE	75910	140570176	140656404	-	upstream	-586513	586513	NearestLocation	4930590L20Rik
chr1	152669434	152679385	9952	2	3	2	1	seq_19264	FALSE	71281	152750551	152757544	+	upstream	-81117	71166	NearestLocation	Apobec4
chr1	153341675	153350057	8383	1	1	5	1	seq_19356	FALSE	226519	153218922	153332786	-	upstream	-8889	8889	NearestLocation	Lamc1
chr1	153637906	153649537	11632	2	4	1	3	seq_19392	FALSE	67792	153653025	153700323	+	upstream	-15119	3488	NearestLocation	Rgs8
chr1	154659232	154669035	9804	2	1	3	2	seq_19529	FALSE	12290	154390731	154884501	-	inside	225269	215466	NearestLocation	Cacna1e
chr1	156709681	156717589	7909	3	2	2	1	seq_19802	FALSE	215015	156678532	156719086	-	inside	9405	1497	NearestLocation	Fam20b
chr1	157070875	157084824	13950	4	2	3	1	seq_19856	FALSE	73435	157099139	157108680	-	downstream	37805	14315	NearestLocation	Tex35
chr1	164077325	164085363	8039	2	1	1	4	seq_20781	FALSE	20343	164061982	164084181	+	overlapEnd	15343	1182	NearestLocation	Sell
chr1	164174691	164185318	10628	2	3	2	2	seq_20793	FALSE	100503816	164148591	164152217	-	upstream	-22474	22474	NearestLocation	Gm16548
chr1	164592754	164603254	10501	1	3	1	3	seq_20844	FALSE	102635083	164503309	164514882	+	downstream	89445	77872	NearestLocation	Gm26685
chr1	166088487	166102143	13657	2	1	4	1	seq_21035	FALSE	240892	166098148	166127922	-	overlapEnd	39435	3995	NearestLocation	Dusp27
chr1	166487313	166495702	8390	3	1	1	3	seq_21088	FALSE	226601	166483613	166497588	-	inside	10275	1886	NearestLocation	Gm4846
chr1	166875876	166885844	9969	2	2	2	3	seq_21140	FALSE	100503962	166974023	166999728	-	downstream	123852	88179	NearestLocation	Gm16701
chr1	167644307	167661315	17009	4	1	0	3	seq_21249	FALSE	110648	167689237	167848741	+	upstream	-44930	27922	NearestLocation	Lmx1a
chr1	168894090	168905295	11206	3	1	3	1	seq_21426	FALSE	102466632	169018974	169019089	-	downstream	124999	113679	NearestLocation	Mir6354
chr1	169383839	169391997	8159	3	3	1	3	seq_21484	FALSE	66977	169497934	169531464	-	downstream	147625	105937	NearestLocation	Nuf2
chr1	171865312	171879516	14205	5	1	2	4	seq_21820	FALSE	12523	171839697	171890718	+	inside	25615	11202	NearestLocation	Cd84
chr1	175241383	175255093	13711	2	3	1	3	seq_22274	FALSE	24012	175059087	175492500	-	inside	251117	182296	NearestLocation	Rgs7
chr1	177888016	177897894	9879	3	1	2	3	seq_22602	FALSE	631584	177808431	177962678	+	inside	79585	64784	NearestLocation	Catspere1
chr1	177949274	177955889	6616	0	1	6	1	seq_22610	FALSE	545391	177983423	178172705	+	upstream	-34149	27534	NearestLocation	Catspere2
chr1	179119044	179130000	10957	1	0	4	4	seq_22768	FALSE	69726	178951960	179518041	-	inside	398997	167084	NearestLocation	Smyd3
chr1	179602055	179614972	12918	3	1	4	2	seq_22832	FALSE	109232	179668210	179687189	+	upstream	-66155	53238	NearestLocation	Sccpdh
chr1	182587934	182595981	8048	3	2	1	2	seq_23234	FALSE	170725	182565007	182632352	+	inside	22927	22927	NearestLocation	Capn8
chr1	183092545	183104386	11842	6	0	2	2	seq_23299	FALSE	68897	183086266	183221522	-	inside	128977	6279	NearestLocation	Disp1
chr1	183295512	183302554	7043	7	6	9	4	seq_23326	TRUE	108909	183297049	183325476	+	overlapStart	-1537	1537	NearestLocation	Aida
chr1	183416410	183424246	7837	3	1	1	3	seq_23339	FALSE	78772	183418462	183436808	+	overlapStart	-2052	2052	NearestLocation	Hhipl2
chr1	187719763	187737129	17367	5	2	1	4	seq_23920	FALSE	26381	187608791	188214885	+	inside	110972	110972	NearestLocation	Esrrg
chr1	193164803	193176347	11545	0	2	4	4	seq_24653	FALSE	319266	193168046	193177832	+	overlapStart	-3243	1485	NearestLocation	A130010J15Rik
chr1	194412697	194422834	10138	2	2	3	1	seq_24832	FALSE	74942	194212187	194222759	-	upstream	-189938	189938	NearestLocation	4930503O07Rik
chr1	195297184	195305576	8393	1	2	1	4	seq_24952	FALSE	12902	195136811	195176716	-	upstream	-120468	120468	NearestLocation	Cr2
chr10	3106000	3118550	12551	17	8	10	13	seq_24961	TRUE	215728	3119841	3129546	+	upstream	-13841	1291	NearestLocation	9230019H11Rik
chr10	3153702	3163688	9987	3	1	1	3	seq_24965	FALSE	619314	3125091	3133193	-	upstream	-20509	20509	NearestLocation	B020014A21Rik
chr10	4147846	4158244	10399	2	2	1	3	seq_25102	FALSE	102632515	4206426	4213114	-	downstream	65268	48182	NearestLocation	Gm30570
chr10	6385580	6395525	9946	4	0	3	1	seq_25387	FALSE	18390	6758506	7038198	+	upstream	-372926	362981	NearestLocation	Oprm1
chr10	8666998	8673178	6181	2	2	2	2	seq_25675	FALSE	338362	8204756	8518825	-	upstream	-148173	148173	NearestLocation	Ust
chr10	9014366	9031560	17195	4	1	1	5	seq_25718	FALSE	70097	8722219	8886070	-	upstream	-128296	128296	NearestLocation	Sash1
chr10	11629306	11636781	7476	2	3	2	3	seq_26047	TRUE	13853	11343404	11459644	+	downstream	285902	169662	NearestLocation	Epm2a
chr10	13339671	13355218	15548	3	0	8	2	seq_26252	FALSE	215789	13207717	13474412	-	inside	134741	119194	NearestLocation	Phactr2
chr10	14044860	14058755	13896	2	4	0	5	seq_26347	FALSE	15273	13966075	14151374	+	inside	78785	78785	NearestLocation	Hivep2
chr10	18621446	18630833	9388	2	3	2	1	seq_26934	FALSE	56016	18539498	18546076	-	upstream	-75370	75370	NearestLocation	Hebp2
chr10	19727892	19739935	12044	2	0	3	3	seq_27092	FALSE	237313	19712570	19760053	+	inside	15322	15322	NearestLocation	Il20ra
chr10	20013693	20025775	12083	1	0	2	5	seq_27125	FALSE	26408	19934472	20142753	+	inside	79221	79221	NearestLocation	Map3k5
chr10	22141237	22145142	3906	2	1	3	6	seq_27408	TRUE	319887	22113050	22149270	-	inside	8033	4128	NearestLocation	E030030I06Rik
chr10	23680959	23692157	11199	4	2	0	3	seq_27607	FALSE	100529074	23785347	23785475	-	downstream	104516	93190	NearestLocation	Snora33
chr10	25133242	25146006	12765	0	2	1	5	seq_27791	FALSE	432442	25169090	25307870	-	downstream	174628	23084	NearestLocation	Akap7
chr10	26201602	26211236	9635	3	1	2	2	seq_27937	FALSE	268288	26229707	26272172	+	upstream	-28105	18471	NearestLocation	Samd3
chr10	38660671	38676392	15722	2	0	3	3	seq_29501	FALSE	215919	38820541	38821779	-	downstream	161108	144149	NearestLocation	Rfpl4b
chr10	38967872	38981075	13204	2	0	4	2	seq_29540	FALSE	16775	38965515	39110188	+	inside	2357	2357	NearestLocation	Lama4
chr10	40679472	40686977	7506	5	2	1	0	seq_29750	FALSE	327747	40683282	40811083	+	overlapStart	-3810	3695	NearestLocation	Mettl24
chr10	43603559	43618177	14619	2	2	0	5	seq_30136	FALSE	414125	43593397	43709668	+	inside	10162	10162	NearestLocation	F930017D23Rik
chr10	45152957	45161169	8213	1	2	1	4	seq_30336	FALSE	78977	45178098	45318452	+	upstream	-25141	16929	NearestLocation	Popdc3
chr10	45302396	45309654	7259	2	1	3	3	seq_30361	FALSE	102638854	45287311	45289424	-	upstream	-12972	12972	NearestLocation	Gm15934
chr10	48397744	48408079	10336	2	1	3	2	seq_30754	FALSE	14806	49094833	49788766	-	downstream	1391022	686754	NearestLocation	Grik2
chr10	50850208	50856582	6375	2	1	2	3	seq_31036	FALSE	20464	50895651	50989152	+	upstream	-45443	39069	NearestLocation	Sim1
chr10	54382431	54392762	10332	1	0	4	3	seq_31494	FALSE	17155	53904785	54076609	-	upstream	-305822	305822	NearestLocation	Man1a
chr10	58220429	58235080	14652	13	8	6	17	seq_31907	TRUE	664783	58230651	58232675	-	includeFeature	12246	2405	NearestLocation	Dux
chr10	61843041	61863873	20833	7	1	6	2	seq_32397	FALSE	404634	61738665	61784147	-	upstream	-58894	58894	NearestLocation	Macroh2a2
chr10	63350980	63360654	9675	2	2	2	2	seq_32587	FALSE	93759	63319005	63381704	-	inside	30724	21050	NearestLocation	Sirt1
chr10	72249969	72264626	14658	2	2	3	6	seq_33711	FALSE	108950	71980092	71980634	-	upstream	-269335	269335	NearestLocation	1700049L16Rik
chr10	74948464	74953935	5472	0	3	2	3	seq_34025	FALSE	14687	74967177	75016907	+	upstream	-18713	13242	NearestLocation	Gnaz
chr10	76426088	76433768	7681	4	1	3	0	seq_34218	FALSE	18541	76351263	76442786	-	inside	16698	9018	NearestLocation	Pcnt
chr10	76626787	76636627	9841	1	2	1	4	seq_34247	FALSE	12834	76595762	76623630	-	upstream	-3157	3157	NearestLocation	Col6a2
chr10	77751218	77761425	10208	2	0	3	3	seq_34413	FALSE	77763	77750521	77751354	-	overlapStart	136	136	NearestLocation	Gm9736
chr10	77932057	77943644	11588	1	1	4	5	seq_34437	FALSE	28240	77907722	77970563	-	inside	38506	24335	NearestLocation	Trpm2
chr10	78091003	78102808	11806	1	2	2	4	seq_34454	FALSE	50723	78069302	78083913	+	downstream	21701	7090	NearestLocation	Icosl
chr10	79629470	79639234	9765	2	2	3	1	seq_34656	FALSE	216148	79618051	79637918	-	overlapStart	8448	1316	NearestLocation	Shc2
chr10	79644244	79656857	12614	5	0	3	5	seq_34658	FALSE	382384	79639526	79645738	-	overlapStart	1494	1494	NearestLocation	Odf3l2
chr10	80399155	80410311	11157	2	3	3	3	seq_34751	FALSE	17192	80392539	80399550	-	overlapStart	395	395	NearestLocation	Mbd3
chr10	80778982	80787083	8102	1	2	3	2	seq_34806	FALSE	20222	80798198	80804924	+	upstream	-19216	11115	NearestLocation	Sf3a2
chr10	81380878	81392814	11937	3	2	3	1	seq_34890	FALSE	102115	81384428	81391560	+	includeFeature	-3550	1254	NearestLocation	Dohh
chr10	82367883	82375011	7129	3	1	2	2	seq_35001	FALSE	432480	82486537	82492618	-	downstream	124735	111526	NearestLocation	Gm1553
chr10	84611255	84625090	13836	1	1	3	3	seq_35309	FALSE	70428	84622292	84727178	+	overlapStart	-11037	2798	NearestLocation	Polr3b
chr10	84625561	84638041	12481	2	0	3	4	seq_35310	FALSE	70428	84622292	84727178	+	inside	3269	3269	NearestLocation	Polr3b
chr10	86116276	86125756	9481	1	1	4	4	seq_35519	FALSE	78170	86095859	86113586	+	downstream	20417	2690	NearestLocation	4930486F22Rik
chr10	86527420	86534458	7039	3	2	0	3	seq_35575	FALSE	27204	86055125	86498896	-	upstream	-28524	28524	NearestLocation	Syn3
chr10	86862867	86876937	14071	0	1	4	3	seq_35619	FALSE	103466	86763972	86838389	+	downstream	98895	24478	NearestLocation	Nt5dc3
chr10	87865796	87880687	14892	3	1	1	4	seq_35754	FALSE	16000	87858265	87937042	+	inside	7531	7531	NearestLocation	Igf1
chr10	89089633	89101891	12259	3	0	3	2	seq_35924	FALSE	216225	88885992	88929515	+	downstream	203641	160118	NearestLocation	Slc5a8
chr10	90575388	90584496	9109	3	1	2	2	seq_36108	FALSE	11783	90989311	91082770	-	downstream	507382	404815	NearestLocation	Apaf1
chr10	92313782	92326969	13188	2	2	4	1	seq_36349	FALSE	627800	92171301	92375373	-	inside	61591	48404	NearestLocation	Gm20757
chr10	92589635	92597977	8343	5	1	1	2	seq_36383	FALSE	17997	92684746	92722420	-	downstream	132785	86769	NearestLocation	Nedd1
chr10	92626135	92634870	8736	0	1	2	5	seq_36386	FALSE	17997	92684746	92722420	-	downstream	96285	49876	NearestLocation	Nedd1
chr10	93011054	93023248	12195	3	1	3	3	seq_36435	FALSE	380654	92775619	93081618	-	inside	70564	58370	NearestLocation	Cfap54
chr10	99076882	99086610	9729	2	2	3	3	seq_37244	FALSE	382406	99107036	99198074	+	upstream	-30154	20426	NearestLocation	Poc1b
chr10	102260209	102270608	10400	1	1	4	2	seq_37651	FALSE	67405	102481756	102490486	-	downstream	230277	211148	NearestLocation	Nts
chr10	102295074	102307405	12332	0	3	3	2	seq_37654	FALSE	67405	102481756	102490486	-	downstream	195412	174351	NearestLocation	Nts
chr10	112603970	112615603	11634	1	1	4	3	seq_38896	TRUE	69355	112726888	112785602	+	upstream	-122918	111285	NearestLocation	1700010J16Rik
chr10	116795466	116804682	9217	0	1	5	2	seq_39400	FALSE	75878	116729253	116739760	+	downstream	66213	55706	NearestLocation	4930579P08Rik
chr10	118030634	118043994	13361	0	3	3	2	seq_39564	TRUE	17245	118141811	118168997	+	upstream	-111177	97817	NearestLocation	Mdm1
chr10	118124149	118133851	9703	1	2	2	3	seq_39576	FALSE	17245	118141811	118168997	+	upstream	-17662	7960	NearestLocation	Mdm1
chr10	118368256	118380093	11838	3	2	1	2	seq_39602	FALSE	15978	118441046	118445892	+	upstream	-72790	60953	NearestLocation	Ifng
chr10	120420462	120429234	8773	2	2	3	1	seq_39869	FALSE	791076	120447991	120448110	-	downstream	27648	18757	NearestLocation	Mir763
chr10	120783983	120795523	11541	2	3	2	1	seq_39914	FALSE	70874	120765732	120778886	+	downstream	18251	5097	NearestLocation	4921513I03Rik
chr10	125011937	125025244	13308	2	3	3	1	seq_40459	FALSE	20503	125219270	125389465	-	downstream	377528	194026	NearestLocation	Slc16a7
chr10	127205985	127217501	11517	1	1	5	1	seq_40763	FALSE	117150	127197067	127211585	-	overlapStart	5600	5600	NearestLocation	Pip4k2c
chr10	127910952	127922437	11486	2	3	1	5	seq_40856	FALSE	70061	127898518	127911761	+	overlapEnd	12434	809	NearestLocation	Sdr9c7
chr11	3099021	3106754	7734	7	9	7	10	seq_41188	TRUE	236604	3125904	3131004	+	upstream	-26883	19150	NearestLocation	Pisd-ps1
chr11	3150487	3156609	6123	2	3	1	2	seq_41194	TRUE	236604	3125904	3131004	+	downstream	24583	19483	NearestLocation	Pisd-ps1
chr11	3180554	3201063	20510	49	34	52	56	seq_41199	TRUE	74203	3202392	3244588	+	upstream	-21838	1329	NearestLocation	Eif4enif1
chr11	5932869	5942962	10094	4	2	0	4	seq_41576	FALSE	103988	5900820	5950081	-	inside	17212	7119	NearestLocation	Gck
chr11	6205989	6213290	7302	2	2	2	2	seq_41615	FALSE	209586	6105691	6200415	-	upstream	-5574	5574	NearestLocation	Nudcd3
chr11	8014734	8026084	11351	2	1	4	1	seq_41865	FALSE	319939	8431652	8664681	-	downstream	649947	405568	NearestLocation	Tns3
chr11	10117635	10128841	11207	3	3	3	3	seq_42158	FALSE	268379	9191942	9684259	+	downstream	925693	433376	NearestLocation	Abca13
chr11	12448899	12461096	12198	1	1	6	1	seq_42461	FALSE	12808	12236608	12464960	-	inside	16061	3864	NearestLocation	Cobl
chr11	12877425	12885250	7826	2	1	1	5	seq_42516	FALSE	12808	12236608	12464960	-	upstream	-412465	412465	NearestLocation	Cobl
chr11	13219092	13231116	12025	0	5	4	3	seq_42558	FALSE	12808	12236608	12464960	-	upstream	-754132	754132	NearestLocation	Cobl
chr11	19693498	19703574	10077	4	1	1	4	seq_43408	FALSE	114716	19924375	20024026	+	upstream	-230877	220801	NearestLocation	Spred2
chr11	22427529	22436235	8707	2	2	2	2	seq_43765	TRUE	103765	22512088	22519234	+	upstream	-84559	75853	NearestLocation	Tmem17
chr11	22483577	22497193	13617	1	3	4	2	seq_43771	FALSE	103765	22512088	22519234	+	upstream	-28511	14895	NearestLocation	Tmem17
chr11	27002177	27013519	11343	1	4	2	1	seq_44354	FALSE	69922	26471322	26593999	-	upstream	-408178	408178	NearestLocation	Vrk2
chr11	28633078	28642544	9467	2	2	0	4	seq_44546	FALSE	72818	28681564	28693276	+	upstream	-48486	39020	NearestLocation	2810471M01Rik
chr11	31475277	31489862	14586	2	0	4	4	seq_44915	FALSE	20856	31357307	31370074	-	upstream	-105203	105203	NearestLocation	Stc2
chr11	33826502	33838254	11753	2	0	2	4	seq_45228	FALSE	16533	33963013	33973641	+	upstream	-136511	124759	NearestLocation	Kcnmb1
chr11	35803782	35810533	6752	2	1	2	3	seq_45490	FALSE	237730	35797382	35798884	-	upstream	-4898	4898	NearestLocation	Fbll1
chr11	42928172	42936775	8604	0	2	2	4	seq_46383	FALSE	319767	43149877	43262285	+	upstream	-221705	213102	NearestLocation	Atp10b
chr11	43377988	43386673	8686	0	0	5	3	seq_46445	FALSE	387164	43374397	43374461	-	upstream	-3527	3527	NearestLocation	Mir146
chr11	43568301	43580912	12612	1	0	6	1	seq_46470	FALSE	16204	43596049	43601540	-	downstream	33239	15137	NearestLocation	Fabp6
chr11	45837515	45848604	11090	1	2	2	4	seq_46787	FALSE	216705	45851964	45910625	+	upstream	-14449	3360	NearestLocation	Clint1
chr11	46144939	46150909	5971	0	1	2	5	seq_46822	FALSE	214112	46148155	46166508	-	overlapEnd	21569	2754	NearestLocation	Nipal4
chr11	47095229	47107011	11783	2	1	2	4	seq_46952	FALSE	276891	46810800	46844332	+	downstream	284429	250897	NearestLocation	Timd4
chr11	47110316	47120235	9920	1	2	3	2	seq_46954	FALSE	276891	46810800	46844332	+	downstream	299516	265984	NearestLocation	Timd4
chr11	48726341	48736870	10530	3	0	2	3	seq_47171	FALSE	14694	48800332	48806434	+	upstream	-73991	63462	NearestLocation	Rack1
chr11	49211342	49221100	9759	1	5	3	0	seq_47237	FALSE	22720	49203292	49218816	+	overlapEnd	8050	2284	NearestLocation	Zfp62
chr11	49625538	49635165	9628	2	2	2	4	seq_47295	FALSE	14257	49609263	49652739	+	inside	16275	16275	NearestLocation	Flt4
chr11	49875820	49887683	11864	2	3	3	3	seq_47329	FALSE	74563	49901835	49980994	+	upstream	-26015	14152	NearestLocation	Rasgef1c
chr11	50577255	50590337	13083	1	4	1	6	seq_47427	FALSE	216725	50602084	50807573	+	upstream	-24829	11747	NearestLocation	Adamts2
chr11	51471318	51477738	6421	1	4	1	2	seq_47551	FALSE	72947	51584757	51604489	+	upstream	-113439	107019	NearestLocation	Phykpl
chr11	52646998	52657934	10937	3	5	1	0	seq_47709	FALSE	320027	52764634	53188538	+	upstream	-117636	106700	NearestLocation	Fstl4
chr11	52683810	52693388	9579	1	2	5	2	seq_47714	FALSE	320027	52764634	53188538	+	upstream	-80824	71246	NearestLocation	Fstl4
chr11	52965130	52971475	6346	5	3	1	0	seq_47751	FALSE	790909	53111451	53120056	-	downstream	154926	139976	NearestLocation	Gm11186
chr11	53772758	53784292	11535	2	3	3	1	seq_47861	FALSE	16362	53770014	53778374	+	overlapEnd	2744	2744	NearestLocation	Irf1
chr11	54139028	54141719	2692	1	3	5	1	seq_47908	TRUE	18452	54100095	54131665	+	downstream	38933	7363	NearestLocation	P4ha2
chr11	54151138	54158455	7318	1	1	4	2	seq_47911	FALSE	18452	54100095	54131665	+	downstream	51043	19473	NearestLocation	P4ha2
chr11	54315526	54324760	9235	2	2	3	2	seq_47934	FALSE	216739	54303798	54364756	+	inside	11728	11728	NearestLocation	Acsl6
chr11	55854308	55864872	10565	2	0	2	4	seq_48126	FALSE	216749	56024987	56041010	-	downstream	186702	160115	NearestLocation	Nmur2
chr11	56001506	56015840	14335	3	4	2	3	seq_48145	FALSE	216749	56024987	56041010	-	downstream	39504	9147	NearestLocation	Nmur2
chr11	56286624	56299535	12912	3	2	1	3	seq_48178	FALSE	216749	56024987	56041010	-	upstream	-245614	245614	NearestLocation	Nmur2
chr11	57398558	57406257	7700	1	2	5	0	seq_48329	FALSE	67726	57482993	57518617	-	downstream	120059	76736	NearestLocation	Fam114a2
chr11	57986187	57996353	10167	0	1	4	3	seq_48407	FALSE	73158	58009064	58062034	+	upstream	-22877	12711	NearestLocation	Larp1
chr11	58348493	58355020	6528	2	0	3	3	seq_48458	FALSE	79566	58330724	58347728	+	downstream	17769	765	NearestLocation	Sh3bp5l
chr11	59167679	59175015	7337	3	1	3	2	seq_48564	FALSE	216792	59155369	59163739	-	upstream	-3940	3940	NearestLocation	Iba57
chr11	59369071	59380465	11395	2	3	2	1	seq_48589	FALSE	216797	59372669	59375657	-	includeFeature	6586	3598	NearestLocation	Prss38
chr11	60032965	60045263	12299	1	1	3	5	seq_48692	FALSE	18618	59970614	60046489	-	inside	13524	1226	NearestLocation	Pemt
chr11	61715902	61726259	10358	1	2	3	3	seq_48921	FALSE	109342	61672781	61720826	-	overlapStart	4924	4924	NearestLocation	Slc5a10
chr11	62189614	62200830	11217	1	2	4	2	seq_48981	FALSE	11541	62248984	62266453	+	upstream	-59370	48154	NearestLocation	Adora2b
chr11	62218638	62228970	10333	1	3	1	3	seq_48983	FALSE	11541	62248984	62266453	+	upstream	-30346	20014	NearestLocation	Adora2b
chr11	63140037	63146862	6826	0	4	3	1	seq_49105	FALSE	18858	63128982	63159547	+	inside	11055	11055	NearestLocation	Pmp22
chr11	63561597	63574630	13034	1	0	4	3	seq_49168	FALSE	54710	63885792	63922290	-	downstream	360693	311162	NearestLocation	Hs3st3b1
chr11	64271955	64283172	11218	3	2	2	2	seq_49256	FALSE	15478	64435332	64522841	+	upstream	-163377	152160	NearestLocation	Hs3st3a1
chr11	66258800	66273419	14620	4	2	4	4	seq_49539	FALSE	237806	65831282	66168551	-	upstream	-90249	90249	NearestLocation	Dnah9
chr11	66455293	66462185	6893	2	1	4	2	seq_49566	FALSE	380702	66211725	66525964	-	inside	70671	63779	NearestLocation	Shisa6
chr11	66504304	66517078	12775	1	5	1	1	seq_49573	FALSE	380702	66211725	66525964	-	inside	21660	8886	NearestLocation	Shisa6
chr11	67213408	67223631	10224	0	4	2	3	seq_49668	FALSE	17879	67200052	67224575	+	inside	13356	944	NearestLocation	Myh1
chr11	67296402	67306108	9707	1	4	2	1	seq_49677	FALSE	544791	67321658	67371586	+	upstream	-25256	15550	NearestLocation	Myh13
chr11	70400832	70410054	9223	2	3	3	0	seq_50090	FALSE	75273	70392883	70410031	-	overlapStart	9199	23	NearestLocation	Pelp1
chr11	71488060	71498224	10165	3	1	2	2	seq_50229	FALSE	619299	71512377	71573183	+	upstream	-24317	14153	NearestLocation	9230020A06Rik
chr11	72078382	72088132	9751	1	1	2	4	seq_50313	FALSE	109212	72042032	72047370	+	downstream	36350	31012	NearestLocation	Pimreg
chr11	74569975	74580951	10977	0	4	2	2	seq_50636	FALSE	380711	74383356	74610915	-	inside	40940	29964	NearestLocation	Rap1gap2
chr11	76064679	76075313	10635	2	2	2	3	seq_50836	FALSE	76566	76019194	76027782	-	upstream	-36897	36897	NearestLocation	Rflnb
chr11	78728439	78738501	10063	3	2	1	2	seq_51196	FALSE	69109	78750506	78751729	-	downstream	23290	12005	NearestLocation	Ccnq
chr11	79302280	79314854	12575	0	6	1	3	seq_51270	FALSE	18015	79339693	79581612	+	upstream	-37413	24839	NearestLocation	Nf1
chr11	79657047	79667102	10056	5	0	2	2	seq_51319	FALSE	72218	79670372	79675128	-	downstream	18081	3270	NearestLocation	Rab11fip4os2
chr11	81698185	81712616	14432	2	2	1	3	seq_51597	FALSE	237880	81572655	81573473	-	upstream	-124712	124712	NearestLocation	1700071K01Rik
chr11	81905505	81917961	12457	4	1	1	4	seq_51625	FALSE	71388	81860673	81894582	+	downstream	44832	10923	NearestLocation	5530401A14Rik
chr11	82807181	82814685	7505	2	3	1	3	seq_51744	FALSE	16882	82781108	82804274	+	downstream	26073	2907	NearestLocation	Lig3
chr11	83731150	83742539	11390	1	3	3	1	seq_51856	FALSE	66107	83746940	83752642	+	upstream	-15790	4401	NearestLocation	Wfdc21
chr11	84384997	84395231	10235	5	2	1	0	seq_51945	FALSE	56321	84422855	84513522	-	downstream	128525	27624	NearestLocation	Aatf
chr11	85668415	85675689	7275	2	1	2	3	seq_52094	FALSE	71489	85702200	85719744	-	downstream	51329	26511	NearestLocation	Bcas3os1
chr11	89149387	89158062	8676	1	3	3	2	seq_52543	FALSE	217071	89073841	89093040	+	downstream	75546	56347	NearestLocation	Gm525
chr11	90213373	90223949	10577	2	1	2	3	seq_52697	FALSE	67468	90187684	90278589	+	inside	25689	25689	NearestLocation	Mmd
chr11	93720186	93731092	10907	0	3	3	2	seq_53169	FALSE	217109	93859243	93885766	-	downstream	165580	128151	NearestLocation	Utp18
chr11	94689278	94697164	7887	3	1	3	1	seq_53304	FALSE	432589	94694498	94704499	-	overlapEnd	15221	2666	NearestLocation	Gm11541
chr11	96829770	96838482	8713	2	1	3	2	seq_53569	FALSE	18023	96817414	96829968	-	overlapStart	198	198	NearestLocation	Nfe2l1
chr11	96916356	96929085	12730	3	2	1	3	seq_53584	FALSE	80280	96907426	96916496	-	overlapStart	140	140	NearestLocation	Cdk5rap3
chr11	98662990	98676022	13033	3	3	4	0	seq_53835	TRUE	57911	98664351	98677708	+	overlapStart	-1361	1361	NearestLocation	Gsdma
chr11	100514621	100524098	9478	0	3	2	3	seq_54075	FALSE	104112	100476353	100528000	-	inside	13379	3902	NearestLocation	Acly
chr11	100965293	100976975	11683	1	2	2	3	seq_54137	FALSE	19285	100956733	100970887	-	overlapStart	5594	5594	NearestLocation	Cavin1
chr11	101046764	101057351	10588	1	0	5	2	seq_54148	FALSE	27419	101070012	101077672	+	upstream	-23248	12661	NearestLocation	Naglu
chr11	103683822	103693197	9376	3	0	2	3	seq_54479	FALSE	399609	103697724	103722832	+	upstream	-13902	4527	NearestLocation	C130046K22Rik
chr11	104319907	104333014	13108	4	1	4	1	seq_54551	FALSE	17762	104231390	104332090	+	overlapEnd	88517	924	NearestLocation	Mapt
chr11	111008691	111017042	8352	3	1	2	2	seq_55439	FALSE	16517	110968033	111027968	+	inside	40658	10926	NearestLocation	Kcnj16
chr11	111151680	111164002	12323	2	1	3	2	seq_55460	FALSE	16518	111066164	111076821	+	downstream	85516	74859	NearestLocation	Kcnj2
chr11	111725052	111735581	10530	3	2	3	1	seq_55534	FALSE	16518	111066164	111076821	+	downstream	658888	648231	NearestLocation	Kcnj2
chr11	112612732	112623468	10737	1	2	5	0	seq_55661	FALSE	217294	112663927	112781976	-	downstream	169244	40459	NearestLocation	BC006965
chr11	112653968	112661950	7983	1	3	3	1	seq_55665	FALSE	217294	112663927	112781976	-	downstream	128008	1977	NearestLocation	BC006965
chr11	116363767	116371158	7392	3	0	4	1	seq_56173	FALSE	15223	116330704	116335399	-	upstream	-28368	28368	NearestLocation	Foxj1
chr11	116377033	116391194	14162	3	0	4	4	seq_56176	TRUE	217340	116336353	116413032	-	inside	35999	21838	NearestLocation	Rnf157
chr11	116495842	116507538	11697	1	2	4	1	seq_56185	FALSE	67763	116470845	116494202	-	upstream	-1640	1640	NearestLocation	Prpsap1
chr11	119201705	119212487	10783	2	2	2	2	seq_56568	FALSE	207592	119143045	119228499	-	inside	26794	16012	NearestLocation	Tbc1d16
chr11	119300684	119311129	10446	1	1	2	4	seq_56581	TRUE	170720	119307768	119345375	+	overlapStart	-7084	3361	NearestLocation	Card14
chr12	3009366	3019296	9931	0	5	2	2	seq_56954	TRUE	74173	3235504	3250377	+	upstream	-226138	216208	NearestLocation	Rab10os
chr12	3108865	3112466	3602	106	98	82	98	seq_56964	TRUE	74173	3235504	3250377	+	upstream	-126639	123038	NearestLocation	Rab10os
chr12	5641681	5649749	8069	0	1	2	5	seq_57306	FALSE	72669	5375870	5416631	+	downstream	265811	225050	NearestLocation	2810032G03Rik
chr12	9277568	9289470	11903	1	4	1	2	seq_57816	FALSE	75516	9029997	9041988	+	downstream	247571	235580	NearestLocation	Ttc32
chr12	9461753	9471648	9896	1	3	1	3	seq_57842	FALSE	23967	9570116	9581500	+	upstream	-108363	98468	NearestLocation	Osr1
chr12	16769257	16777334	8078	1	0	5	2	seq_58824	FALSE	268527	16670615	16800886	-	inside	31629	23552	NearestLocation	Greb1
chr12	17100837	17115950	15114	3	1	6	4	seq_58866	FALSE	382571	17172100	17176888	-	downstream	76051	56150	NearestLocation	Kcnf1
chr12	17272388	17282822	10435	4	1	2	1	seq_58886	FALSE	71853	17266545	17284770	+	inside	5843	1948	NearestLocation	Pdia6
chr12	17852569	17860921	8353	1	3	0	4	seq_58969	FALSE	53602	17690856	17791933	+	downstream	161713	60636	NearestLocation	Hpcal1
chr12	18479574	18488976	9403	3	1	2	2	seq_59060	FALSE	236366	18514510	18535254	+	upstream	-34936	25534	NearestLocation	5730507C01Rik
chr12	18670108	18682015	11908	3	3	1	1	seq_59088	FALSE	236366	18514510	18535254	+	downstream	155598	134854	NearestLocation	5730507C01Rik
chr12	19176159	19186218	10060	3	3	2	1	seq_59161	FALSE	236366	18514510	18535254	+	downstream	661649	640905	NearestLocation	5730507C01Rik
chr12	19416107	19428687	12581	3	1	3	1	seq_59195	FALSE	236366	18514510	18535254	+	downstream	901597	880853	NearestLocation	5730507C01Rik
chr12	20219506	20235699	16194	8	5	8	4	seq_59302	TRUE	69513	20804381	20815779	-	downstream	596273	568682	NearestLocation	1700030C10Rik
chr12	21177178	21191944	14767	2	3	1	5	seq_59425	FALSE	54451	21285525	21315056	+	upstream	-108347	93581	NearestLocation	Cpsf3
chr12	21592784	21608382	15599	2	4	5	1	seq_59481	FALSE	22630	21390071	21417637	-	upstream	-175147	175147	NearestLocation	Ywhaq
chr12	22090755	22097937	7183	1	3	2	2	seq_59551	TRUE	100043416	22115756	22156646	-	downstream	65891	17819	NearestLocation	Gm4425
chr12	23039474	23053185	13712	2	2	4	2	seq_59662	FALSE	69732	22953995	23010284	-	upstream	-29190	29190	NearestLocation	2410018L13Rik
chr12	25553160	25566329	13170	1	2	5	4	seq_59995	FALSE	432641	25129174	25134931	+	downstream	423986	418229	NearestLocation	Gm17746
chr12	25797259	25814679	17421	1	0	6	4	seq_60025	FALSE	629481	26091962	26210505	-	downstream	413246	277283	NearestLocation	Gm29687
chr12	27370933	27381097	10165	1	1	3	3	seq_60240	FALSE	20666	27334264	27342574	-	upstream	-28359	28359	NearestLocation	Sox11
chr12	27576693	27590818	14126	2	0	4	4	seq_60269	TRUE	20666	27334264	27342574	-	upstream	-234119	234119	NearestLocation	Sox11
chr12	28687273	28698932	11660	4	1	2	1	seq_60413	FALSE	102465980	28679325	28679389	+	downstream	7948	7884	NearestLocation	Mir6937
chr12	29008737	29021124	12388	3	0	2	3	seq_60458	FALSE	102633758	28910229	29041874	+	inside	98508	20750	NearestLocation	Gm31508
chr12	38013874	38023105	9232	4	1	2	1	seq_61613	FALSE	217480	37817726	38634239	+	inside	196148	196148	NearestLocation	Dgkb
chr12	40018924	40025970	7047	3	1	2	2	seq_61861	FALSE	11861	40005447	40038025	-	inside	19101	12055	NearestLocation	Arl4a
chr12	40422244	40434003	11760	1	0	7	2	seq_61915	FALSE	246196	40315046	40445902	-	inside	23658	11899	NearestLocation	Zfp277
chr12	48385513	48391009	5497	4	1	1	2	seq_62896	FALSE	15228	49382660	49386861	+	upstream	-997147	991651	NearestLocation	Foxg1
chr12	52431850	52444402	12553	2	2	4	0	seq_63388	FALSE	102638611	52475739	52480609	-	downstream	48759	31337	NearestLocation	Gm35135
chr12	56870297	56877333	7037	3	1	2	2	seq_63933	FALSE	18511	56691767	56712822	+	downstream	178530	157475	NearestLocation	Pax9
chr12	61836093	61843609	7517	3	0	1	4	seq_64554	FALSE	238205	61523150	61857928	+	inside	312943	14319	NearestLocation	Lrfn5
chr12	67056921	67063555	6635	20	13	22	19	seq_65177	TRUE	320772	66466060	67222549	-	inside	165628	158994	NearestLocation	Mdga2
chr12	69053179	69061389	8211	1	3	4	0	seq_65410	TRUE	20090	69157722	69159186	-	downstream	106007	96333	NearestLocation	Rps29
chr12	69103427	69111292	7866	3	2	2	1	seq_65416	FALSE	20090	69157722	69159186	-	downstream	55759	46430	NearestLocation	Rps29
chr12	69443019	69455315	12297	2	2	2	4	seq_65458	FALSE	76062	69464787	69475550	-	downstream	32531	9472	NearestLocation	5830428M24Rik
chr12	71491261	71507408	16148	4	5	2	4	seq_65735	FALSE	73815	71488285	71556133	+	inside	2976	2976	NearestLocation	4930404H11Rik
chr12	73879301	73890084	10784	2	4	0	3	seq_66038	FALSE	15251	73901375	73947530	+	upstream	-22074	11291	NearestLocation	Hif1a
chr12	74802840	74805505	2666	14	8	6	6	seq_66156	TRUE	238271	74897220	75177332	-	downstream	374492	91715	NearestLocation	Kcnh5
chr12	75460567	75471798	11232	2	2	2	2	seq_66244	FALSE	217674	75411722	75416781	-	upstream	-43786	43786	NearestLocation	Gphb5
chr12	79781395	79793288	11894	1	1	5	2	seq_66802	FALSE	77290	79917019	79936264	-	downstream	154869	123731	NearestLocation	9430078K24Rik
chr12	87852982	87867828	14847	2	2	3	2	seq_67882	TRUE	100038982	87861366	87863967	+	includeFeature	-8384	3861	NearestLocation	Gm1995
chr12	88088985	88101596	12612	7	0	2	1	seq_67918	FALSE	111043194	88036540	88036798	-	upstream	-52187	52187	NearestLocation	Gm46993
chr12	88849752	88859525	9774	2	1	5	1	seq_68018	FALSE	18191	88722876	90334935	+	inside	126876	126876	NearestLocation	Nrxn3
chr12	90640539	90650874	10336	3	2	2	2	seq_68239	FALSE	13371	90724552	90738438	-	downstream	97899	73678	NearestLocation	Dio2
chr12	91526766	91540661	13896	3	3	5	1	seq_68348	FALSE	83602	91555262	91590487	-	downstream	63721	14601	NearestLocation	Gtf2a1
chr12	92987494	93000009	12516	2	0	4	3	seq_68530	FALSE	75295	93416458	93444823	-	downstream	457329	416449	NearestLocation	4930559C10Rik
chr12	97931747	97943106	11360	3	3	2	0	seq_69133	FALSE	14420	98202294	98259459	-	downstream	327712	259188	NearestLocation	Galc
chr12	98712343	98724151	11809	6	1	1	1	seq_69236	FALSE	24000	98676741	98737405	-	inside	25062	13254	NearestLocation	Ptpn21
chr12	99055878	99066098	10221	3	1	3	1	seq_69279	FALSE	67639	99161277	99162808	-	downstream	106930	95179	NearestLocation	4930474N09Rik
chr12	101248037	101254917	6881	1	4	0	3	seq_69572	FALSE	74947	101145614	101149758	+	downstream	102423	98279	NearestLocation	Kif4-ps
chr12	101619839	101630702	10864	3	3	2	1	seq_69610	FALSE	74413	101645443	101718523	-	downstream	98684	14741	NearestLocation	Tc2n
chr12	103346846	103356461	9616	1	3	1	4	seq_69847	FALSE	65256	103321142	103356001	-	overlapStart	9155	460	NearestLocation	Asb2
chr12	103798387	103815327	16941	3	1	3	5	seq_69907	TRUE	20701	103728156	103830373	-	inside	31986	15046	NearestLocation	Serpina1b
chr12	103846495	103860304	13810	3	2	2	5	seq_69914	FALSE	20700	103853589	103863562	-	overlapEnd	17067	3258	NearestLocation	Serpina1a
chr12	104618735	104627297	8563	5	0	2	1	seq_70041	FALSE	192119	104687742	104751952	-	downstream	133217	60445	NearestLocation	Dicer1
chr12	105497092	105506030	8939	5	1	1	1	seq_70157	FALSE	104932	105513480	105515246	+	upstream	-16388	7450	NearestLocation	AU015791
chr12	106060791	106072129	11339	6	1	1	1	seq_70234	FALSE	22367	106010228	106077426	+	inside	50563	5297	NearestLocation	Vrk1
chr12	108156637	108167006	10370	2	2	2	4	seq_70517	FALSE	52690	108106431	108179314	-	inside	22677	12308	NearestLocation	Setd3
chr12	109365437	109377806	12370	1	2	4	1	seq_70676	FALSE	13386	109452823	109463336	+	upstream	-87386	75017	NearestLocation	Dlk1
chr12	109507187	109514842	7656	0	1	3	4	seq_70692	FALSE	17263	109541001	109571726	+	upstream	-33814	26159	NearestLocation	Meg3
chr12	113735218	113741555	6338	1	1	2	4	seq_71281	FALSE	238406	113543908	113546465	+	downstream	191310	188753	NearestLocation	Adam6a
chr12	115364593	115375205	10613	3	4	0	3	seq_71506	FALSE	102465205	115695720	115695794	-	downstream	331201	320515	NearestLocation	Mir6388
chr13	3370357	3375171	4815	4	7	11	6	seq_72176	TRUE	76937	3478230	3498570	+	upstream	-107873	103059	NearestLocation	2810429I04Rik
chr13	5347290	5356026	8737	1	1	2	4	seq_72425	FALSE	71867	5855508	5858092	-	downstream	510802	499482	NearestLocation	1700016G22Rik
chr13	8534942	8544950	10009	1	3	4	2	seq_72835	FALSE	207615	8802968	8871909	-	downstream	336967	258018	NearestLocation	Wdr37
chr13	8664693	8673614	8922	2	3	3	1	seq_72852	FALSE	207615	8802968	8871909	-	downstream	207216	129354	NearestLocation	Wdr37
chr13	8735076	8740910	5835	3	0	2	4	seq_72861	FALSE	207615	8802968	8871909	-	downstream	136833	62058	NearestLocation	Wdr37
chr13	9008054	9018582	10529	2	1	5	5	seq_72894	FALSE	69237	8966331	8996083	-	upstream	-11971	11971	NearestLocation	Gtpbp4
chr13	9381929	9393583	11655	4	0	2	5	seq_72945	FALSE	208440	9276528	9668928	+	inside	105401	105401	NearestLocation	Dip2c
chr13	9827895	9835981	8087	2	1	1	4	seq_73006	TRUE	66505	9684833	9765330	-	upstream	-62565	62565	NearestLocation	Zmynd11
chr13	9858130	9869482	11353	6	1	1	0	seq_73010	FALSE	66505	9684833	9765330	-	upstream	-92800	92800	NearestLocation	Zmynd11
chr13	10131226	10148460	17235	4	4	3	2	seq_73049	FALSE	12671	9875486	10360847	-	inside	229621	212387	NearestLocation	Chrm3
chr13	12829347	12841644	12298	4	2	2	4	seq_73385	TRUE	18812	12790816	12800079	-	upstream	-29268	29268	NearestLocation	Prl2c3
chr13	12886889	12897130	10242	1	1	4	3	seq_73391	TRUE	18812	12790816	12800079	-	upstream	-86810	86810	NearestLocation	Prl2c3
chr13	12926060	12941227	15168	3	2	7	7	seq_73397	TRUE	18811	12996125	13005383	-	downstream	79323	54898	NearestLocation	Prl2c2
chr13	15329359	15338497	9139	4	0	3	2	seq_73709	FALSE	14634	15463235	15730026	+	upstream	-133876	124738	NearestLocation	Gli3
chr13	24207376	24215166	7791	4	2	0	2	seq_74899	FALSE	68732	24012344	24280795	-	inside	73419	65629	NearestLocation	Carmil1
chr13	24315764	24329175	13412	1	4	3	1	seq_74915	FALSE	12763	24327404	24477377	+	overlapStart	-11640	1771	NearestLocation	Cmah
chr13	24329771	24341681	11911	1	4	1	4	seq_74916	FALSE	12763	24327404	24477377	+	inside	2367	2367	NearestLocation	Cmah
chr13	26755683	26765296	9614	1	4	2	1	seq_75234	FALSE	15192	26768173	26770165	-	downstream	14482	2877	NearestLocation	Hdgfl1
chr13	28207773	28219096	11324	1	0	4	3	seq_75409	FALSE	28078	28142484	28151611	+	downstream	65289	56162	NearestLocation	Prl5a1
chr13	28545208	28551146	5939	1	3	0	5	seq_75453	FALSE	102466635	28710781	28710873	-	downstream	165665	159635	NearestLocation	Mir6368
chr13	30459146	30468421	9276	3	3	1	1	seq_75701	FALSE	66694	30540308	30545362	-	downstream	86216	71887	NearestLocation	Uqcrfs1
chr13	31830191	31843189	12999	3	2	6	1	seq_75881	FALSE	17300	31806633	31812476	+	downstream	23558	17715	NearestLocation	Foxc1
chr13	34359929	34371017	11089	3	0	3	3	seq_76196	FALSE	73102	34179158	34345182	-	upstream	-14747	14747	NearestLocation	Slc22a23
chr13	35144033	35155025	10993	4	1	2	2	seq_76302	FALSE	100503727	35167927	35188017	+	upstream	-23894	12902	NearestLocation	1700011B04Rik
chr13	37003101	37011635	8535	2	1	5	2	seq_76553	FALSE	74145	36867178	37050244	-	inside	47143	38609	NearestLocation	F13a1
chr13	43085827	43098038	12212	4	1	2	1	seq_77375	FALSE	67046	43151740	43171501	-	downstream	85674	53702	NearestLocation	Tbc1d7
chr13	43229545	43241279	11735	1	2	3	2	seq_77398	FALSE	67046	43151740	43171501	-	upstream	-58044	58044	NearestLocation	Tbc1d7
chr13	43427194	43437355	10162	1	2	3	2	seq_77428	FALSE	70078	43398390	43407097	+	downstream	28804	20097	NearestLocation	Nol7
chr13	44162071	44179807	17737	6	1	3	2	seq_77533	FALSE	100503592	44185760	44216487	-	downstream	54416	5953	NearestLocation	A330076C08Rik
chr13	47923885	47935250	11366	2	4	2	0	seq_78039	FALSE	619327	47910435	47934301	+	overlapEnd	13450	949	NearestLocation	G630093K05Rik
chr13	49698484	49708234	9751	2	1	4	2	seq_78285	FALSE	105148	49682100	49734267	+	inside	16384	16384	NearestLocation	Iars
chr13	52151351	52161262	9912	2	0	5	1	seq_78631	FALSE	74050	52096741	52124158	+	downstream	54610	27193	NearestLocation	4921525O09Rik
chr13	53354411	53365023	10613	5	2	0	3	seq_78788	FALSE	268656	53332748	53377397	-	inside	22986	12374	NearestLocation	Sptlc1
chr13	53737976	53751175	13200	2	3	1	2	seq_78846	FALSE	75252	53648585	53650080	+	downstream	89391	87896	NearestLocation	4930555G21Rik
chr13	54724413	54735643	11231	0	1	2	8	seq_78998	FALSE	26913	54736671	54749874	-	downstream	25461	1028	NearestLocation	Gprin1
chr13	57697503	57707902	10400	3	1	3	1	seq_79410	FALSE	20745	57421195	57908332	-	inside	210829	200430	NearestLocation	Spock1
chr13	57862035	57873192	11158	1	4	2	2	seq_79429	FALSE	20745	57421195	57908332	-	inside	46297	35140	NearestLocation	Spock1
chr13	60630928	60641262	10335	2	1	1	4	seq_79801	FALSE	69635	60601947	60763191	+	inside	28981	28981	NearestLocation	Dapk1
chr13	62028926	62037389	8464	3	0	5	0	seq_79992	FALSE	630579	62129886	62236144	+	upstream	-100960	92497	NearestLocation	Zfp808
chr13	64109985	64118732	8748	2	1	3	2	seq_80276	FALSE	70484	64096308	64129368	-	inside	19383	10636	NearestLocation	Slc35d2
chr13	68362822	68370396	7575	1	2	2	3	seq_80799	FALSE	666272	68353364	68356825	-	upstream	-5997	5997	NearestLocation	Gm8016
chr13	69764634	69774002	9369	2	1	4	1	seq_81000	FALSE	76980	69702832	69739889	-	upstream	-24745	24745	NearestLocation	Ube2ql1
chr13	71863712	71874398	10687	1	3	1	3	seq_81288	FALSE	16371	71957921	71963723	-	downstream	100011	83523	NearestLocation	Irx1
chr13	71914518	71923866	9349	3	1	1	3	seq_81295	FALSE	16371	71957921	71963723	-	downstream	49205	34055	NearestLocation	Irx1
chr13	72211797	72226974	15178	3	5	3	3	seq_81333	FALSE	16371	71957921	71963723	-	upstream	-248074	248074	NearestLocation	Irx1
chr13	73107813	73116551	8739	2	3	0	3	seq_81461	FALSE	50916	73260479	73269608	+	upstream	-152666	143928	NearestLocation	Irx4
chr13	73561102	73573791	12690	2	3	4	4	seq_81524	FALSE	13162	73536747	73578672	+	inside	24355	4881	NearestLocation	Slc6a3
chr13	74208905	74224536	15632	2	1	0	7	seq_81618	FALSE	211446	74169488	74208732	-	upstream	-173	173	NearestLocation	Exoc3
chr13	74525807	74533462	7656	3	4	1	3	seq_81658	TRUE	235956	74480054	74493992	-	upstream	-31815	31815	NearestLocation	Zfp825
chr13	86682851	86695108	12258	6	1	0	2	seq_83159	FALSE	12867	86044816	86046904	-	upstream	-635947	635947	NearestLocation	Cox7c
chr13	90243921	90253007	9087	1	1	4	3	seq_83565	FALSE	108138	89774027	90089608	-	upstream	-154313	154313	NearestLocation	Xrcc4
chr13	94008218	94020728	12511	3	2	1	2	seq_84079	TRUE	218454	94057796	94195409	+	upstream	-49578	37068	NearestLocation	Lhfpl2
chr13	94962165	94975148	12984	2	2	2	3	seq_84195	FALSE	218460	94976344	95023314	+	upstream	-14179	1196	NearestLocation	Wdr41
chr13	96098549	96107737	9189	1	3	0	4	seq_84346	FALSE	75209	95954594	96132577	-	inside	34028	24840	NearestLocation	Sv2c
chr13	97477410	97487351	9942	2	2	4	2	seq_84525	FALSE	100039691	97434970	97497007	+	inside	42440	9656	NearestLocation	Lncenc1
chr13	99659527	99680078	20552	4	2	4	5	seq_84829	FALSE	17755	99421446	99516540	-	upstream	-142987	142987	NearestLocation	Map1b
chr13	99970622	99982717	12096	1	0	1	6	seq_84868	FALSE	78038	99948530	100015639	-	inside	45017	22092	NearestLocation	Mccc2
chr13	100298661	100317578	18918	3	3	3	3	seq_84902	FALSE	17952	100281121	100317674	-	inside	19013	96	NearestLocation	Naip6
chr13	103971362	103983145	11784	2	4	1	2	seq_85391	FALSE	59079	103818787	103920514	-	upstream	-50848	50848	NearestLocation	Erbin
chr13	104594099	104607175	13077	2	1	5	2	seq_85466	FALSE	67288	104792484	104839274	+	upstream	-198385	185309	NearestLocation	Srek1ip1
chr13	104860143	104872455	12313	4	0	1	4	seq_85497	FALSE	77803	104845283	104863893	-	overlapStart	3750	3750	NearestLocation	Shisal2b
chr13	110059898	110074453	14556	2	1	5	2	seq_86201	FALSE	100316683	109903809	109903888	+	downstream	156089	156010	NearestLocation	Mir1904
chr13	110922367	110931786	9420	0	2	1	5	seq_86322	FALSE	102636142	110882852	110903846	-	upstream	-18521	18521	NearestLocation	4930526H09Rik
chr13	119594887	119606103	11217	15	12	18	24	seq_87405	TRUE	56838	119623819	119654359	+	upstream	-28932	17716	NearestLocation	Ccl28
chr14	4354539	4362680	8142	2	1	3	2	seq_87606	FALSE	554327	4334763	4354688	+	overlapEnd	19776	149	NearestLocation	2610042L04Rik
chr14	5928999	5938349	9351	1	1	1	5	seq_87736	FALSE	100041515	5438065	5807982	-	upstream	-121017	121017	NearestLocation	Gm3383
chr14	6293959	6306373	12415	1	2	2	4	seq_87783	TRUE	100861615	6259747	6287250	-	upstream	-6709	6709	NearestLocation	LOC100861615
chr14	8332910	8344033	11124	0	3	4	1	seq_88016	FALSE	268709	8296274	8318023	-	upstream	-14887	14887	NearestLocation	Fam107a
chr14	8936613	8946228	9616	4	1	1	2	seq_88108	FALSE	74859	8666386	8673378	+	downstream	270227	263235	NearestLocation	4930455B14Rik
chr14	13597983	13606696	8714	4	0	1	3	seq_88744	FALSE	218739	13670876	13683148	+	upstream	-72893	64180	NearestLocation	Sntn
chr14	14647810	14654157	6348	1	1	3	3	seq_88896	FALSE	218756	14702279	14799940	+	upstream	-54469	48122	NearestLocation	Slc4a7
chr14	17273151	17283543	10393	3	2	2	1	seq_89243	FALSE	100417973	17105561	17105876	+	downstream	167590	167275	NearestLocation	Pou5f1-rs6
chr14	17843313	17854006	10694	2	2	3	1	seq_89319	FALSE	21834	17660261	18038090	+	inside	183052	183052	NearestLocation	Thrb
chr14	18070626	18079316	8691	3	0	3	2	seq_89349	FALSE	353187	18204054	18239127	-	downstream	168501	124738	NearestLocation	Nr1d2
chr14	19040511	19048520	8010	2	1	3	2	seq_89489	FALSE	218793	18573575	18894267	-	upstream	-146244	146244	NearestLocation	Ube2e2
chr14	19412829	19420664	7836	118	81	107	109	seq_89540	TRUE	432825	19594139	19602581	-	downstream	189752	173475	NearestLocation	Gm5458
chr14	19780219	19795032	14814	2	4	3	3	seq_89571	FALSE	68045	19811351	19823824	-	downstream	43605	16319	NearestLocation	Rtraf
chr14	22361802	22368297	6496	2	2	2	3	seq_89922	FALSE	74896	22507174	22542823	-	downstream	181021	138877	NearestLocation	4930405A10Rik
chr14	23347461	23356074	8614	0	3	2	3	seq_90055	FALSE	791307	23038194	23094571	-	upstream	-252890	252890	NearestLocation	Gm10248
chr14	24010920	24019302	8383	3	2	1	3	seq_90138	FALSE	16531	23289431	24014491	-	overlapStart	3571	3571	NearestLocation	Kcnma1
chr14	24745435	24757553	12119	3	1	2	3	seq_90238	FALSE	20088	24487125	24496959	+	downstream	258310	248476	NearestLocation	Rps24
chr14	26737928	26744757	6830	3	0	1	4	seq_90458	FALSE	110083	26693274	26891703	+	inside	44654	44654	NearestLocation	Dnah12
chr14	28280969	28289104	8136	5	2	2	0	seq_90671	FALSE	22418	28504750	28527448	+	upstream	-223781	215646	NearestLocation	Wnt5a
chr14	28527989	28536629	8641	1	0	5	3	seq_90709	FALSE	22418	28504750	28527448	+	downstream	23239	541	NearestLocation	Wnt5a
chr14	30041331	30055836	14506	3	2	2	4	seq_90916	FALSE	218865	30009023	30040527	+	downstream	32308	804	NearestLocation	Chdh
chr14	31447553	31454286	6734	1	1	5	1	seq_91117	FALSE	24056	31359880	31436078	-	upstream	-11475	11475	NearestLocation	Sh3bp5
chr14	33068438	33076985	8548	1	3	2	3	seq_91339	FALSE	67580	32991382	33015291	+	downstream	77056	53147	NearestLocation	Lrrc18
chr14	34114462	34127021	12560	3	2	3	3	seq_91478	FALSE	105518	34051126	34102754	-	upstream	-11708	11708	NearestLocation	A630023A22Rik
chr14	35173679	35180296	6618	3	0	2	3	seq_91612	FALSE	723847	34894609	34894706	+	downstream	279070	278973	NearestLocation	Mir346
chr14	35733062	35743096	10035	3	2	2	2	seq_91685	FALSE	239036	35809488	35811978	-	downstream	78916	66392	NearestLocation	4930596D02Rik
chr14	38300977	38311157	10181	4	2	3	0	seq_92020	FALSE	75170	38898302	38958794	+	upstream	-597325	587145	NearestLocation	Nrg3os
chr14	39663086	39670848	7763	1	3	3	1	seq_92213	FALSE	73591	39655663	39685293	+	inside	7423	7423	NearestLocation	1700109I08Rik
chr14	41453607	41458449	4843	4	2	2	0	seq_92461	TRUE	100041722	41573211	41581305	+	upstream	-119604	114762	NearestLocation	1700049E17Rik2
chr14	41521878	41529951	8074	5	1	1	3	seq_92471	TRUE	100041722	41573211	41581305	+	upstream	-51333	43260	NearestLocation	1700049E17Rik2
chr14	43248119	43280189	32071	9	4	10	11	seq_92660	TRUE	108168154	43275036	43306011	+	overlapStart	-26917	5153	NearestLocation	Gm9732
chr14	43309010	43321580	12571	4	2	2	4	seq_92666	TRUE	71826	43342383	43347811	-	downstream	38801	20803	NearestLocation	1700001F09Rik
chr14	43322160	43343904	21745	12	5	8	8	seq_92667	TRUE	71826	43342383	43347811	-	overlapEnd	25651	1521	NearestLocation	1700001F09Rik
chr14	43357628	43367281	9654	2	3	1	3	seq_92670	TRUE	71826	43342383	43347811	-	upstream	-9817	9817	NearestLocation	1700001F09Rik
chr14	44585544	44599078	13535	4	1	1	3	seq_92818	FALSE	385138	44492463	44506345	+	downstream	93081	79199	NearestLocation	BC061237
chr14	45430079	45438084	8006	1	3	1	3	seq_92924	FALSE	54342	45376334	45404913	-	upstream	-25166	25166	NearestLocation	Gnpnat1
chr14	45736937	45744225	7289	3	1	4	0	seq_92961	TRUE	114874	45588467	45658143	-	upstream	-78794	78794	NearestLocation	Ddhd1
chr14	49221692	49229209	7518	1	3	1	3	seq_93421	FALSE	67082	49219588	49245474	-	inside	23782	2104	NearestLocation	ccdc198
chr14	50910490	50925674	15185	2	2	5	3	seq_93641	FALSE	11792	50924968	50927139	+	overlapStart	-14478	706	NearestLocation	Apex1
chr14	51234321	51241936	7616	2	2	0	4	seq_93686	FALSE	93726	51255262	51256112	-	downstream	21791	13326	NearestLocation	Rnase2a
chr14	51572548	51583287	10740	2	2	2	2	seq_93732	FALSE	434459	51552790	51662953	+	inside	19758	19758	NearestLocation	Gm5622
chr14	51711323	51720603	9281	2	2	0	4	seq_93747	FALSE	545047	51711643	51717183	-	includeFeature	5860	320	NearestLocation	Gm5800
chr14	55300906	55309968	9063	2	5	1	0	seq_94176	FALSE	71412	55222007	55241435	+	downstream	78899	59471	NearestLocation	Dhrs2
chr14	55388701	55398605	9905	0	1	1	6	seq_94188	FALSE	28200	55478758	55490340	+	upstream	-90057	80153	NearestLocation	Dhrs4
chr14	56011971	56021709	9739	1	3	2	3	seq_94270	FALSE	17224	56017971	56020384	+	includeFeature	-6000	1325	NearestLocation	Mcpt1
chr14	56621440	56632216	10777	0	3	3	3	seq_94345	FALSE	102635191	56607261	56620513	-	upstream	-927	927	NearestLocation	Gm16573
chr14	57982006	57991059	9054	3	2	2	1	seq_94514	FALSE	68514	57916261	57999262	-	inside	17256	8203	NearestLocation	Micu2
chr14	58330798	58338089	7292	1	4	1	2	seq_94558	FALSE	14180	58070547	58112720	+	downstream	260251	218078	NearestLocation	Fgf9
chr14	58925678	58935867	10190	0	2	3	3	seq_94642	FALSE	67932	59133040	59142893	-	downstream	217215	197173	NearestLocation	1700129C05Rik
chr14	59359036	59369899	10864	2	2	2	2	seq_94697	FALSE	219132	59347407	59365470	-	overlapStart	6434	4429	NearestLocation	Phf11d
chr14	59917270	59927545	10276	3	3	2	0	seq_94780	FALSE	50769	59638540	60197179	-	inside	279909	269634	NearestLocation	Atp8a2
chr14	60845214	60857311	12098	5	1	1	2	seq_94904	FALSE	70478	60784573	60905478	+	inside	60641	48167	NearestLocation	Mipep
chr14	62769592	62781200	11609	2	2	2	6	seq_95172	FALSE	18130	62676330	62761169	-	upstream	-8423	8423	NearestLocation	Ints6
chr14	62928212	62939968	11757	4	1	0	4	seq_95188	FALSE	432867	62977524	62984510	-	downstream	56298	37556	NearestLocation	Defb48
chr14	66082729	66092310	9582	0	1	7	0	seq_95619	FALSE	11495	66027329	66077733	-	upstream	-4996	4996	NearestLocation	Adam2
chr14	68312884	68332037	19154	2	2	4	4	seq_95920	FALSE	18040	68082590	68124846	-	upstream	-188038	188038	NearestLocation	Nefm
chr14	70192914	70199647	6734	1	0	6	2	seq_96110	FALSE	20410	70180468	70211989	-	inside	19075	12342	NearestLocation	Sorbs3
chr14	71892853	71905484	12632	2	2	4	3	seq_96351	FALSE	74667	71856702	71920439	+	inside	36151	14955	NearestLocation	4930434J06Rik
chr14	72456162	72463999	7838	4	0	3	1	seq_96433	FALSE	319448	72537946	72710003	-	downstream	253841	73947	NearestLocation	Fndc3a
chr14	74818047	74829071	11025	3	0	2	3	seq_96748	FALSE	13885	74732297	74750765	+	downstream	85750	67282	NearestLocation	Esd
chr14	75673292	75685017	11726	1	2	2	3	seq_96859	FALSE	75272	75642249	75696717	+	inside	31043	11700	NearestLocation	Erich6b
chr14	76113531	76125241	11711	2	3	1	3	seq_96925	FALSE	27275	76110891	76137379	+	inside	2640	2640	NearestLocation	Nufip1
chr14	77259273	77267509	8237	2	0	5	1	seq_97087	FALSE	239188	77156763	77721760	+	inside	102510	102510	NearestLocation	Enox1
chr14	86174769	86184669	9901	1	2	3	2	seq_98191	FALSE	75155	86245970	86283688	+	upstream	-71201	61301	NearestLocation	4930529K09Rik
chr14	86356880	86364922	8043	5	0	2	1	seq_98210	FALSE	75155	86245970	86283688	+	downstream	110910	73192	NearestLocation	4930529K09Rik
chr14	99794265	99806593	12329	1	3	2	3	seq_99768	FALSE	16597	99870632	100284679	-	downstream	490414	64039	NearestLocation	Klf12
chr14	104847862	104858387	10526	1	0	5	2	seq_100430	FALSE	320249	104612791	104966783	+	inside	235071	108396	NearestLocation	D130009I18Rik
chr14	110802774	110812720	9947	2	1	3	2	seq_101134	FALSE	239250	110748580	110755149	-	upstream	-47625	47625	NearestLocation	Slitrk6
chr14	114057245	114066784	9540	2	2	1	3	seq_101500	FALSE	75822	114831965	114861327	+	upstream	-774720	765181	NearestLocation	4930524C18Rik
chr14	117388332	117403085	14754	1	4	3	1	seq_101913	FALSE	23888	116925315	117976544	+	inside	463017	463017	NearestLocation	Gpc6
chr14	118117680	118127966	10287	2	1	2	3	seq_102011	FALSE	76355	118111911	118132755	-	inside	15075	4789	NearestLocation	Tgds
chr14	118537793	118549204	11412	3	1	3	1	seq_102067	FALSE	102465208	118592369	118592472	-	downstream	54679	43165	NearestLocation	Mir6391
chr14	119501986	119509218	7233	1	3	3	1	seq_102203	FALSE	75432	119749225	119751564	+	upstream	-247239	240007	NearestLocation	1700006F04Rik
chr14	120323575	120332347	8773	2	0	2	4	seq_102314	FALSE	105559	120275669	120431697	+	inside	47906	47906	NearestLocation	Mbnl2
chr14	120346007	120355920	9914	1	3	2	2	seq_102315	FALSE	105559	120275669	120431697	+	inside	70338	70338	NearestLocation	Mbnl2
chr14	121036836	121049865	13030	3	1	2	2	seq_102407	FALSE	223254	121035200	121283744	+	inside	1636	1636	NearestLocation	Farp1
chr14	121944000	121951532	7533	1	3	2	2	seq_102519	FALSE	321019	121952551	121965195	-	downstream	21195	1019	NearestLocation	Gpr183
chr14	122016005	122024912	8908	3	4	0	1	seq_102527	FALSE	223262	122034674	122038420	+	upstream	-18669	9762	NearestLocation	Timm8a2
chr15	3808528	3822519	13992	2	1	3	2	seq_102963	TRUE	106052	3965445	3979573	-	downstream	171045	142926	NearestLocation	Fbxo4
chr15	10358112	10372720	14609	3	2	1	4	seq_103774	FALSE	268782	10358532	10410153	+	overlapStart	-420	420	NearestLocation	Agxt2
chr15	11913036	11923658	10623	3	3	2	1	seq_103977	TRUE	18162	11839896	11907287	-	upstream	-5749	5749	NearestLocation	Npr3
chr15	12367070	12374065	6996	3	1	4	1	seq_104036	FALSE	66629	12321450	12351591	+	downstream	45620	15479	NearestLocation	Golph3
chr15	12398080	12409086	11007	2	1	1	4	seq_104040	FALSE	66629	12321450	12351591	+	downstream	76630	46489	NearestLocation	Golph3
chr15	12538739	12548326	9588	0	5	1	3	seq_104061	FALSE	68070	12359711	12739924	-	inside	201185	179028	NearestLocation	Pdzd2
chr15	15057179	15067545	10367	1	2	1	4	seq_104370	TRUE	12565	16728756	16857094	+	upstream	-1671577	1661211	NearestLocation	Cdh9
chr15	27871404	27881874	10471	1	1	3	5	seq_105899	FALSE	223435	27730651	28025848	-	inside	154444	140753	NearestLocation	Trio
chr15	28132747	28143726	10980	2	1	3	3	seq_105942	FALSE	110082	28203752	28472052	+	upstream	-71005	60026	NearestLocation	Dnah5
chr15	32404080	32410987	6908	0	1	2	5	seq_106467	FALSE	20356	32244810	32696341	+	inside	159270	159270	NearestLocation	Sema5a
chr15	42024862	42029634	4773	2	1	2	3	seq_107736	FALSE	223513	41864076	41869720	-	upstream	-155142	155142	NearestLocation	Abra
chr15	43875605	43882083	6479	2	0	4	2	seq_107964	FALSE	239408	43864646	43870036	-	upstream	-5569	5569	NearestLocation	Tmem74
chr15	46033274	46046013	12740	2	1	3	4	seq_108230	FALSE	71120	46324559	46373907	+	upstream	-291285	278546	NearestLocation	1700022A22Rik
chr15	50112576	50123445	10870	2	1	5	1	seq_108688	FALSE	100316685	50889025	50889114	-	downstream	776538	765580	NearestLocation	Mir1907
chr15	50513851	50525828	11978	0	4	2	2	seq_108736	FALSE	100316685	50889025	50889114	-	downstream	375263	363197	NearestLocation	Mir1907
chr15	51567482	51577287	9806	3	3	2	1	seq_108859	FALSE	100502643	51231640	51395610	-	upstream	-171872	171872	NearestLocation	Gm19303
chr15	56143400	56151282	7883	2	2	1	5	seq_109484	FALSE	20649	55636388	55906949	-	upstream	-236451	236451	NearestLocation	Sntb1
chr15	57830734	57844865	14132	2	3	4	3	seq_109707	FALSE	67819	57869502	57892448	-	downstream	61714	24637	NearestLocation	Derl1
chr15	58530226	58539734	9509	3	2	1	2	seq_109797	FALSE	631797	58510048	58665092	+	inside	20178	20178	NearestLocation	Fer1l6
chr15	60158268	60170953	12686	2	1	4	1	seq_110008	TRUE	71088	60014866	60016613	-	upstream	-141655	141655	NearestLocation	4933412E24Rik
chr15	62201424	62214189	12766	3	5	1	1	seq_110267	FALSE	67552	62218221	62219332	-	downstream	17908	4032	NearestLocation	H2afy3
chr15	67174705	67183863	9159	1	3	3	1	seq_110937	FALSE	20442	67102875	67176830	-	overlapStart	2125	2125	NearestLocation	St3gal1
chr15	69102113	69118977	16865	6	2	4	2	seq_111193	FALSE	75076	69270533	69274720	+	upstream	-168420	151556	NearestLocation	4930504C09Rik
chr15	70062729	70073537	10809	4	0	3	1	seq_111321	FALSE	100503580	70011623	70077841	+	inside	51106	4304	NearestLocation	Gm19782
chr15	70529720	70537283	7564	2	2	1	3	seq_111379	FALSE	100503580	70011623	70077841	+	downstream	518097	451879	NearestLocation	Gm19782
chr15	73840805	73848560	7756	1	0	5	2	seq_111843	FALSE	268816	73760067	73839699	-	upstream	-1106	1106	NearestLocation	Mroh5
chr15	74451263	74461950	10688	2	1	4	3	seq_111942	FALSE	107831	74516195	74589465	+	upstream	-64932	54245	NearestLocation	Adgrb1
chr15	75042902	75052431	9530	2	1	2	3	seq_112027	TRUE	17067	75044018	75048830	-	includeFeature	5928	1116	NearestLocation	Ly6c1
chr15	75084479	75088046	3568	10	7	14	18	seq_112031	TRUE	100041546	75108158	75111970	-	downstream	27491	20112	NearestLocation	Ly6c2
chr15	75214732	75228710	13979	1	1	2	6	seq_112049	FALSE	223631	75216376	75222661	+	includeFeature	-1644	1644	NearestLocation	Ly6g2
chr15	76602062	76609066	7005	4	1	1	2	seq_112245	FALSE	94230	76595803	76607591	-	overlapStart	5529	1475	NearestLocation	Cpsf1
chr15	77688496	77701270	12775	4	2	1	4	seq_112399	FALSE	666348	77698857	77719285	+	overlapStart	-10361	2413	NearestLocation	Apol7e
chr15	78136530	78146528	9999	2	1	3	2	seq_112453	FALSE	12300	77991748	78120028	-	upstream	-16502	16502	NearestLocation	Cacng2
chr15	79889156	79900382	11227	2	2	2	2	seq_112672	TRUE	80287	79891659	79915906	+	overlapStart	-2503	2503	NearestLocation	Apobec3
chr15	80673781	80683871	10091	3	1	2	2	seq_112772	FALSE	213956	80671847	80700425	+	inside	1934	1934	NearestLocation	Fam83f
chr15	81029652	81037212	7561	2	2	3	1	seq_112819	FALSE	105835	80977765	81012290	+	downstream	51887	17362	NearestLocation	Sgsm3
chr15	82260047	82267988	7942	2	3	0	3	seq_112976	FALSE	24050	82268802	82294574	+	upstream	-8755	814	NearestLocation	2003-09-01
chr15	85520397	85532653	12257	0	3	5	1	seq_113421	FALSE	328577	85492736	85503227	-	upstream	-17170	17170	NearestLocation	7530416G11Rik
chr15	86891345	86902925	11581	1	2	5	2	seq_113608	FALSE	106014	87544299	87759364	+	upstream	-652954	641374	NearestLocation	Tafa5
chr15	86971433	86987300	15868	4	2	1	3	seq_113621	FALSE	106014	87544299	87759364	+	upstream	-572866	556999	NearestLocation	Tafa5
chr15	87260945	87270974	10030	4	1	1	2	seq_113661	FALSE	106014	87544299	87759364	+	upstream	-283354	273325	NearestLocation	Tafa5
chr15	87704245	87717096	12852	3	1	4	2	seq_113717	FALSE	102465209	87795850	87795943	-	downstream	91698	78754	NearestLocation	Mir6393
chr15	88498985	88510241	11257	1	2	0	5	seq_113829	FALSE	70073	88600302	88601669	+	upstream	-101317	90061	NearestLocation	Zdhhc25
chr15	88909903	88919086	9184	2	0	5	1	seq_113887	FALSE	239591	88890633	88954418	-	inside	44515	19270	NearestLocation	Ttll8
chr15	93635784	93646364	10581	2	1	3	2	seq_114502	FALSE	106042	93499114	93595891	-	upstream	-39893	39893	NearestLocation	Prickle1
chr15	96117540	96127378	9839	0	3	1	5	seq_114831	FALSE	402773	96051603	96079553	-	upstream	-37987	37987	NearestLocation	D030018L15Rik
chr15	97628945	97640976	12032	1	1	3	3	seq_115029	FALSE	71919	97675097	97705825	-	downstream	76880	34121	NearestLocation	Rpap3
chr15	100170572	100179149	8578	1	2	3	2	seq_115357	FALSE	11908	100227819	100261244	+	upstream	-57247	48670	NearestLocation	Atf1
chr15	103174938	103184991	10054	3	1	3	2	seq_115755	FALSE	71726	103153290	103167092	-	upstream	-7846	7846	NearestLocation	Smug1
chr15	103881187	103891502	10316	2	1	0	5	seq_115822	TRUE	20770	103895855	103899312	-	downstream	18125	4353	NearestLocation	Mucl2
chr16	3230574	3249081	18508	4	10	13	10	seq_115847	TRUE	258859	3592398	3593339	+	upstream	-361824	343317	NearestLocation	Olfr161
chr16	4710485	4724674	14190	2	0	3	4	seq_116042	FALSE	67824	4710059	4719356	-	overlapStart	8871	426	NearestLocation	Nmral1
chr16	4762071	4775814	13744	1	3	3	1	seq_116048	FALSE	66626	4750348	4790292	-	inside	28221	11723	NearestLocation	Cdip1
chr16	5431667	5442151	10485	2	2	2	2	seq_116136	FALSE	70511	5244152	5255983	-	upstream	-175684	175684	NearestLocation	Eef2kmt
chr16	5496678	5504905	8228	5	0	2	2	seq_116144	FALSE	70511	5244152	5255983	-	upstream	-240695	240695	NearestLocation	Eef2kmt
chr16	9480805	9493026	12222	1	3	0	4	seq_116693	FALSE	14811	9567898	9994923	-	downstream	514118	74872	NearestLocation	Grin2a
chr16	10970343	10978922	8580	5	0	4	5	seq_116890	TRUE	545180	10861755	10938364	-	upstream	-31979	31979	NearestLocation	Gm21859
chr16	11016953	11027722	10770	3	2	1	2	seq_116896	FALSE	20621	11060945	11074985	+	upstream	-43992	33223	NearestLocation	Snn
chr16	11138220	11147167	8948	0	1	2	5	seq_116910	TRUE	106200	11074911	11134650	-	upstream	-3570	3570	NearestLocation	Txndc11
chr16	11822430	11831152	8723	2	1	2	3	seq_117018	FALSE	73761	11778429	11781500	+	downstream	44001	40930	NearestLocation	4833415N18Rik
chr16	12229076	12240611	11536	3	0	4	2	seq_117087	FALSE	72555	11984113	12270902	+	inside	244963	30291	NearestLocation	Shisa9
chr16	18114226	18125964	11739	1	2	2	3	seq_117907	FALSE	65079	18127642	18152408	+	upstream	-13416	1678	NearestLocation	Rtn4r
chr16	18222708	18235207	12500	0	4	2	4	seq_117925	FALSE	27801	18220753	18235136	-	overlapStart	12428	71	NearestLocation	Zdhhc8
chr16	18915818	18927183	11366	2	3	0	3	seq_118028	FALSE	18100	18872018	18876862	-	upstream	-38956	38956	NearestLocation	Mrpl40
chr16	18941941	18963327	21387	8	4	1	4	seq_118032	TRUE	18100	18872018	18876862	-	upstream	-65079	65079	NearestLocation	Mrpl40
chr16	19437911	19448471	10561	3	3	3	1	seq_118090	FALSE	258458	19407039	19408078	-	upstream	-29833	29833	NearestLocation	Olfr165
chr16	19592130	19603167	11038	3	1	2	4	seq_118109	TRUE	258959	19605696	19606703	-	downstream	14573	2529	NearestLocation	Olfr170
chr16	21320708	21332326	11619	1	2	4	4	seq_118330	FALSE	76222	21331902	21333356	-	overlapEnd	12648	424	NearestLocation	Magef1
chr16	23141405	23149913	8509	2	3	2	2	seq_118566	FALSE	11450	23146536	23158028	+	overlapStart	-5131	3377	NearestLocation	Adipoq
chr16	23896667	23904448	7782	4	1	1	3	seq_118672	FALSE	20604	23889573	23890958	-	upstream	-5709	5709	NearestLocation	Sst
chr16	26673025	26679728	6704	2	2	3	3	seq_119058	FALSE	100504628	26714446	26755502	-	downstream	82477	34718	NearestLocation	Gm20319
chr16	29711325	29723559	12235	2	3	2	2	seq_119440	FALSE	74143	29579334	29654884	+	downstream	131991	56441	NearestLocation	Opa1
chr16	29842865	29848534	5670	0	1	2	5	seq_119465	FALSE	328657	29957927	29979184	-	downstream	136319	109393	NearestLocation	Gm1968
chr16	33004247	33012212	7966	4	2	2	1	seq_119895	FALSE	69707	33012683	33056218	-	downstream	51971	471	NearestLocation	Iqcg
chr16	35099107	35112922	13816	1	1	5	4	seq_120183	FALSE	224129	35154877	35305738	+	upstream	-55770	41955	NearestLocation	Adcy5
chr16	35224686	35234477	9792	0	5	0	4	seq_120203	FALSE	224129	35154877	35305738	+	inside	69809	69809	NearestLocation	Adcy5
chr16	35931870	35943723	11854	1	2	4	2	seq_120298	FALSE	209200	35926511	35939151	-	overlapStart	7281	4572	NearestLocation	Dtx3l
chr16	38368518	38382731	14214	2	3	1	2	seq_120626	FALSE	64082	38362209	38378216	+	overlapEnd	6309	4515	NearestLocation	Popdc2
chr16	39722140	39735146	13007	0	2	4	3	seq_120807	FALSE	268890	39984361	42181679	+	upstream	-262221	249215	NearestLocation	Lsamp
chr16	45613206	45623447	10242	1	4	2	1	seq_121558	FALSE	14525	45610380	45622867	+	overlapEnd	2826	580	NearestLocation	Gcsam
chr16	47038570	47046847	8278	0	3	5	0	seq_121732	FALSE	58998	46387706	46498525	-	upstream	-540045	540045	NearestLocation	Nectin3
chr16	51524078	51534172	10095	2	3	1	2	seq_122314	FALSE	629091	51980376	52005495	-	downstream	481417	446204	NearestLocation	Gm29686
chr16	57388568	57392676	4109	1	4	2	2	seq_123030	TRUE	78749	57353093	57573126	+	inside	35475	35475	NearestLocation	Filip1l
chr16	62499585	62511701	12117	2	1	1	4	seq_123630	FALSE	106338	62732444	62786818	-	downstream	287233	220743	NearestLocation	Nsun3
chr16	65866268	65877063	10796	2	2	3	2	seq_124026	FALSE	73569	65815257	65866368	+	overlapEnd	51011	100	NearestLocation	Vgll3
chr16	77287417	77296374	8958	2	4	0	2	seq_125337	FALSE	77994	77236317	77691403	+	inside	51100	51100	NearestLocation	Mir99ahg
chr16	81495027	81506995	11969	2	0	2	4	seq_125815	FALSE	17968	81200697	81626828	+	inside	294330	119833	NearestLocation	Ncam2
chr16	84811097	84819409	8313	4	4	0	2	seq_126185	FALSE	14390	84834925	84863779	+	upstream	-23828	15516	NearestLocation	Gabpa
chr16	84986100	85003573	17474	3	2	3	3	seq_126206	FALSE	100038614	84972214	84979451	+	downstream	13886	6649	NearestLocation	Gm10791
chr16	87769775	87778569	8795	4	1	3	1	seq_126543	FALSE	12013	87698945	87733346	+	downstream	70830	36429	NearestLocation	Bach1
chr16	89890153	89902899	12747	3	1	4	1	seq_126799	FALSE	21844	89787111	90143769	-	inside	253616	103042	NearestLocation	Tiam1
chr16	90227065	90235913	8849	2	2	2	3	seq_126845	FALSE	20655	90220754	90226329	+	downstream	6311	736	NearestLocation	Sod1
chr16	92851002	92862643	11642	1	1	4	2	seq_127198	FALSE	12394	92601466	92826149	-	upstream	-24853	24853	NearestLocation	Runx1
chr16	94692126	94703958	11833	0	2	4	3	seq_127464	FALSE	13548	94570010	94695517	+	overlapEnd	122116	3391	NearestLocation	Dyrk1a
chr16	94767709	94780121	12413	5	1	1	1	seq_127476	FALSE	13548	94570010	94695517	+	downstream	197699	72192	NearestLocation	Dyrk1a
chr16	94983626	94993469	9844	3	2	2	1	seq_127506	FALSE	16522	94748636	94997701	-	inside	14075	4232	NearestLocation	Kcnj6
chr16	97043929	97055010	11082	0	1	6	1	seq_127786	FALSE	13508	96590840	97170752	-	inside	126823	115742	NearestLocation	Dscam
chr16	97949524	97964652	15129	1	4	3	2	seq_127922	FALSE	114565	97947435	97962622	-	overlapStart	13098	2030	NearestLocation	Zbtb21
chr17	3005825	3014006	8182	5	2	0	5	seq_127939	TRUE	328734	3076578	3084183	-	downstream	78358	62572	NearestLocation	Pisd-ps2
chr17	3014076	3025909	11834	3	3	2	6	seq_127940	TRUE	328734	3076578	3084183	-	downstream	70107	50669	NearestLocation	Pisd-ps2
chr17	3025993	3038762	12770	3	3	10	7	seq_127941	TRUE	328734	3076578	3084183	-	downstream	58190	37816	NearestLocation	Pisd-ps2
chr17	5329334	5340316	10983	2	1	2	3	seq_128265	FALSE	106557	5417323	5418767	-	downstream	89433	77007	NearestLocation	Ldhal6b
chr17	5546953	5557699	10747	3	2	3	2	seq_128295	FALSE	224454	5492557	5753811	+	inside	54396	54396	NearestLocation	Zdhhc14
chr17	7204642	7218869	14228	4	1	4	1	seq_128500	FALSE	20112	7170115	7303315	+	inside	34527	34527	NearestLocation	Rps6ka2
chr17	7291864	7308108	16245	2	2	5	4	seq_128513	TRUE	21461	7324646	7345974	+	upstream	-32782	16538	NearestLocation	Tcp10a
chr17	8462150	8476771	14622	3	3	4	2	seq_128656	FALSE	20997	8434423	8442496	+	downstream	27727	19654	NearestLocation	T
chr17	8638608	8646451	7844	2	2	3	2	seq_128682	FALSE	23984	8525372	8986648	+	inside	113236	113236	NearestLocation	Pde10a
chr17	8674333	8682048	7716	0	3	2	3	seq_128687	FALSE	23984	8525372	8986648	+	inside	148961	148961	NearestLocation	Pde10a
chr17	12526376	12536244	9869	1	1	1	5	seq_129177	FALSE	20519	12418960	12507704	-	upstream	-18672	18672	NearestLocation	Slc22a3
chr17	13175730	13197781	22052	8	4	4	4	seq_129258	TRUE	100038394	13205042	13206209	+	upstream	-29312	7261	NearestLocation	Gm10512
chr17	13209848	13238094	28247	8	9	5	11	seq_129261	TRUE	236574	13230257	13237184	+	includeFeature	-20409	910	NearestLocation	Smok2b
chr17	13304968	13316059	11092	4	6	5	3	seq_129263	TRUE	100041352	13354572	13377223	+	upstream	-49604	38513	NearestLocation	Tcp10c
chr17	13323533	13335695	12163	4	4	3	5	seq_129265	TRUE	100041352	13354572	13377223	+	upstream	-31039	18877	NearestLocation	Tcp10c
chr17	13344263	13358383	14121	2	4	4	5	seq_129268	TRUE	100041352	13354572	13377223	+	overlapStart	-10309	3811	NearestLocation	Tcp10c
chr17	13391992	13407112	15121	5	5	4	6	seq_129274	TRUE	100041352	13354572	13377223	+	downstream	37420	14769	NearestLocation	Tcp10c
chr17	13441987	13451528	9542	0	1	2	6	seq_129280	TRUE	272667	13521456	13528433	+	upstream	-79469	69928	NearestLocation	Smok4a
chr17	13451793	13460694	8902	1	3	0	4	seq_129281	TRUE	272667	13521456	13528433	+	upstream	-69663	60762	NearestLocation	Smok4a
chr17	13539979	13554197	14219	42	12	22	28	seq_129292	TRUE	272667	13521456	13528433	+	downstream	18523	11546	NearestLocation	Smok4a
chr17	13585247	13592613	7367	5	5	7	8	seq_129298	TRUE	272667	13521456	13528433	+	downstream	63791	56814	NearestLocation	Smok4a
chr17	14450551	14460562	10012	0	2	4	2	seq_129404	FALSE	74917	14389113	14398942	-	upstream	-51609	51609	NearestLocation	4930474M22Rik
chr17	14812472	14823517	11046	0	2	5	1	seq_129455	FALSE	21826	14665500	14694235	-	upstream	-118237	118237	NearestLocation	Thbs2
chr17	19975448	19984463	9016	1	3	2	3	seq_130101	FALSE	22313	20028418	20048336	-	downstream	72888	43955	NearestLocation	Vmn2r104
chr17	23512933	23523608	10676	5	2	0	5	seq_130569	TRUE	320020	23550799	23565291	+	upstream	-37866	27191	NearestLocation	6330415G19Rik
chr17	24864386	24873469	9084	0	1	3	4	seq_130734	FALSE	16005	24865997	24882010	+	overlapStart	-1611	1611	NearestLocation	Igfals
chr17	25470243	25478213	7971	2	1	3	2	seq_130820	FALSE	71840	25454615	25476602	+	overlapEnd	15628	1611	NearestLocation	Tekt4
chr17	26209828	26227153	17326	1	4	3	3	seq_130911	FALSE	14570	26199183	26207786	-	upstream	-2042	2042	NearestLocation	Arhgdig
chr17	26301197	26313647	12451	3	1	0	5	seq_130918	FALSE	66978	26252896	26285504	+	downstream	48301	15693	NearestLocation	Luc7l
chr17	26410603	26419775	9173	1	0	4	4	seq_130933	FALSE	240055	26414829	26446349	+	overlapStart	-4226	4226	NearestLocation	Neurl1b
chr17	29101331	29110145	8815	6	0	3	1	seq_131291	TRUE	442827	29114145	29148980	+	upstream	-12814	4000	NearestLocation	Rab44
chr17	30437382	30447098	9717	2	2	1	4	seq_131470	FALSE	623169	30395620	30396033	-	upstream	-41349	41349	NearestLocation	Gm6402
chr17	31765717	31778795	13079	4	1	3	2	seq_131647	FALSE	17691	31844250	31855804	-	downstream	90087	65455	NearestLocation	Sik1
chr17	31979811	31989796	9986	1	4	2	1	seq_131674	FALSE	72462	32036100	32062865	+	upstream	-56289	46304	NearestLocation	Rrp1b
chr17	32309409	32317208	7800	3	1	1	3	seq_131716	FALSE	56399	32303672	32321238	-	inside	11829	4030	NearestLocation	Akap8
chr17	37663294	37673060	9767	0	2	2	4	seq_132410	FALSE	404308	37672025	37672990	+	includeFeature	-8731	70	NearestLocation	Olfr118
chr17	38544750	38555618	10869	3	0	3	2	seq_132512	FALSE	100126773	38554192	38560621	+	overlapStart	-9442	1426	NearestLocation	Esp34
chr17	39841996	39849337	7342	27	16	26	25	seq_132684	TRUE	100861531	39843013	39848788	+	includeFeature	-1017	549	NearestLocation	Rn45s
chr17	41389628	41398909	9282	3	1	2	2	seq_132881	FALSE	83815	40923051	40935047	-	upstream	-454581	454581	NearestLocation	Cenpq
chr17	43044789	43057209	12421	5	2	3	0	seq_133105	FALSE	94185	43016555	43089189	+	inside	28234	28234	NearestLocation	Tnfrsf21
chr17	44760497	44772002	11506	0	3	4	2	seq_133332	FALSE	109115	44777152	45119290	+	upstream	-16655	5150	NearestLocation	Supt3
chr17	45432411	45442078	9668	3	3	2	3	seq_133416	FALSE	105246278	45433598	45442544	+	overlapStart	-1187	466	NearestLocation	B230354K17Rik
chr17	45921184	45928034	6851	1	2	3	2	seq_133476	FALSE	75154	45879850	45881452	-	upstream	-39732	39732	NearestLocation	4930542M03Rik
chr17	48310316	48324275	13960	3	1	5	0	seq_133799	FALSE	320148	48316141	48327024	+	overlapStart	-5825	2749	NearestLocation	B430306N03Rik
chr17	48655825	48675256	19432	3	3	3	2	seq_133845	FALSE	76589	48454901	48539714	+	downstream	200924	116111	NearestLocation	Unc5cl
chr17	49792111	49799685	7575	2	2	2	2	seq_133997	FALSE	319991	49615136	49909847	+	inside	176975	110162	NearestLocation	Kif6
chr17	49923676	49932368	8693	2	1	3	2	seq_134014	FALSE	76438	49992257	50190674	-	downstream	266998	59889	NearestLocation	Rftn1
chr17	50662992	50675081	12090	1	0	5	3	seq_134114	FALSE	224860	50509403	50688484	+	inside	153589	13403	NearestLocation	Plcl2
chr17	51303547	51316913	13367	3	2	3	2	seq_134187	FALSE	328837	51425209	51435838	-	downstream	132291	108296	NearestLocation	C330011F03Rik
chr17	53046394	53056272	9879	0	5	2	2	seq_134422	TRUE	211482	53398889	53463321	-	downstream	416927	342617	NearestLocation	Efhb
chr17	56662333	56673585	11253	2	2	3	3	seq_134893	FALSE	71810	56673294	56711764	+	overlapStart	-10961	291	NearestLocation	Ranbp3
chr17	58129995	58140053	10059	3	2	4	0	seq_135076	FALSE	620292	57769570	58410355	+	inside	360425	270302	NearestLocation	Cntnap5c
chr17	58702730	58715100	12371	3	1	2	2	seq_135153	FALSE	69239	58878808	58991375	-	downstream	288645	163708	NearestLocation	Pdzph1
chr17	66058391	66068706	10316	3	0	2	3	seq_136050	FALSE	106585	65965698	66077089	-	inside	18698	8383	NearestLocation	Ankrd12
chr17	72021079	72032641	11563	0	1	5	2	seq_136823	FALSE	78785	71768473	71864273	+	downstream	252606	156806	NearestLocation	Clip4
chr17	72463552	72473645	10094	3	0	2	3	seq_136887	FALSE	11682	71868972	72604627	-	inside	141075	130982	NearestLocation	Alk
chr17	72729223	72737435	8213	2	1	3	3	seq_136922	FALSE	383295	72836453	72851195	+	upstream	-107230	99018	NearestLocation	Ypel5
chr17	73666183	73678469	12287	3	1	4	0	seq_137055	FALSE	71685	73493228	73710453	-	inside	44270	31984	NearestLocation	Galnt14
chr17	75935590	75946628	11039	2	2	3	1	seq_137376	FALSE	100043885	75861023	75889039	+	downstream	74567	46551	NearestLocation	Gm4710
chr17	83248755	83258798	10044	3	3	1	2	seq_138308	FALSE	106522	83215292	83225070	+	downstream	33463	23685	NearestLocation	Pkdcc
chr17	84757945	84768537	10593	1	0	3	4	seq_138515	FALSE	72416	84705247	84790789	-	inside	32844	22252	NearestLocation	Lrpprc
chr17	85689248	85699055	9808	3	3	1	3	seq_138632	FALSE	20472	85684277	85688274	-	upstream	-974	974	NearestLocation	Six2
chr17	86609270	86623603	14334	4	2	1	2	seq_138767	FALSE	13819	86753700	86833410	+	upstream	-144430	130097	NearestLocation	Epas1
chr17	87910040	87922847	12808	3	2	3	2	seq_138945	FALSE	17688	87975062	87990892	+	upstream	-65022	52215	NearestLocation	Msh6
chr18	3003669	3007116	3448	5	3	4	6	seq_139805	TRUE	100312476	3122492	3123412	-	downstream	119743	115376	NearestLocation	Vmn1r238
chr18	3008662	3013826	5165	2	2	2	3	seq_139806	TRUE	100312476	3122492	3123412	-	downstream	114750	108666	NearestLocation	Vmn1r238
chr18	5803111	5814655	11545	1	3	3	2	seq_140174	FALSE	791318	5491503	5593505	-	upstream	-209606	209606	NearestLocation	Gm10125
chr18	10960686	10971456	10771	2	1	4	1	seq_140872	FALSE	14465	11052064	11085635	+	upstream	-91378	80608	NearestLocation	Gata6
chr18	13370456	13377415	6960	2	0	2	4	seq_141184	FALSE	225192	13006990	13022882	+	downstream	363466	347574	NearestLocation	Hrh4
chr18	27620836	27632362	11527	3	2	2	1	seq_143047	FALSE	320624	28862850	28998176	+	upstream	-1242014	1230488	NearestLocation	4930474G06Rik
chr18	30561905	30572348	10444	2	3	1	3	seq_143433	FALSE	225326	30272747	30348126	+	downstream	289158	213779	NearestLocation	Pik3c3
chr18	32402165	32411939	9775	3	1	1	3	seq_143674	FALSE	402767	32359053	32378278	-	upstream	-23887	23887	NearestLocation	A830052D11Rik
chr18	32540600	32549655	9056	2	2	3	1	seq_143689	FALSE	71683	32528322	32560034	-	inside	19434	10379	NearestLocation	Gypc
chr18	33182480	33191154	8675	1	1	5	1	seq_143772	FALSE	170459	33199355	33213862	-	downstream	31382	8201	NearestLocation	Stard4
chr18	33857082	33876571	19490	1	5	3	4	seq_143868	FALSE	69749	33794892	33795986	+	downstream	62190	61096	NearestLocation	Epb41l4aos
chr18	42599677	42612759	13083	5	3	1	1	seq_144988	FALSE	240239	42577881	42579652	-	upstream	-20025	20025	NearestLocation	Gpr151
chr18	43751736	43763162	11427	3	1	3	2	seq_145164	FALSE	117158	43764289	43767399	+	upstream	-12553	1127	NearestLocation	Scgb3a2
chr18	44607442	44618269	10828	0	4	3	3	seq_145271	FALSE	626275	44661665	44676271	+	upstream	-54223	43396	NearestLocation	A930012L18Rik
chr18	45522568	45531072	8505	2	3	2	1	seq_145389	FALSE	140492	45268860	45686024	+	inside	253708	154952	NearestLocation	Kcnn2
chr18	45995036	46006807	11772	2	3	0	4	seq_145449	TRUE	107003	45683487	46045260	-	inside	50224	38453	NearestLocation	A330093E20Rik
chr18	52561783	52576495	14713	4	3	2	0	seq_146292	FALSE	16948	52516067	52529867	-	upstream	-31916	31916	NearestLocation	Lox
chr18	53667687	53676528	8842	1	5	0	2	seq_146432	FALSE	100502945	53639106	53705420	+	inside	28581	28581	NearestLocation	Gm19466
chr18	56899014	56910492	11479	1	2	3	2	seq_146862	FALSE	320253	56761716	56925548	-	inside	26534	15056	NearestLocation	2003-03-01
chr18	62310898	62316414	5517	2	0	2	5	seq_147545	FALSE	15562	62324204	62496577	+	upstream	-13306	7790	NearestLocation	Htr4
chr18	64841291	64857209	15919	4	2	2	2	seq_147882	FALSE	83814	64887705	65217828	+	upstream	-46414	30496	NearestLocation	Nedd4l
chr18	70014148	70023211	9064	5	1	0	2	seq_148580	FALSE	381175	69925426	69969484	+	downstream	88722	44664	NearestLocation	Ccdc68
chr18	73071958	73084494	12537	2	1	3	3	seq_148994	FALSE	240396	73573044	73592575	+	upstream	-501086	488550	NearestLocation	Mex3c
chr18	74481273	74491693	10421	0	0	8	0	seq_149173	FALSE	73606	74525140	74531124	-	downstream	49851	33447	NearestLocation	1700120E14Rik
chr18	76444839	76453143	8305	4	1	2	2	seq_149447	FALSE	17126	76241580	76310963	+	downstream	203259	133876	NearestLocation	Smad2
chr18	76652618	76662508	9891	1	3	3	2	seq_149470	FALSE	664805	76856405	76900342	+	upstream	-203787	193897	NearestLocation	Skor2
chr18	78844585	78854582	9998	0	1	4	5	seq_149744	FALSE	27411	78146148	78596942	-	upstream	-247643	247643	NearestLocation	Slc14a2
chr18	81596115	81611075	14961	2	4	5	1	seq_150121	FALSE	100628596	81992010	81992080	-	downstream	395965	380935	NearestLocation	Mir5127
chr18	82158759	82171619	12861	7	3	9	2	seq_150201	TRUE	100628596	81992010	81992080	-	upstream	-166679	166679	NearestLocation	Mir5127
chr18	87924401	87935072	10672	2	1	2	6	seq_150928	FALSE	54607	88668695	88927481	-	downstream	1003080	733623	NearestLocation	Socs6
chr19	3219516	3226311	6796	2	2	2	2	seq_151287	TRUE	70011	3053071	3197732	-	upstream	-21784	21784	NearestLocation	1700030N03Rik
chr19	4909575	4921308	11734	3	1	1	5	seq_151512	FALSE	52028	4886878	4906628	-	upstream	-2947	2947	NearestLocation	Bbs1
chr19	8004062	8014091	10030	1	2	3	2	seq_151908	FALSE	171405	7864388	7966027	-	upstream	-38035	38035	NearestLocation	Slc22a27
chr19	8135099	8144375	9277	1	3	3	3	seq_151921	FALSE	434674	8062209	8131982	-	upstream	-3117	3117	NearestLocation	Slc22a28
chr19	8819863	8828659	8797	1	1	4	2	seq_152015	FALSE	68693	8820010	8841137	+	overlapStart	-147	147	NearestLocation	Hnrnpul2
chr19	8997176	9017878	20703	4	2	2	4	seq_152038	FALSE	66395	8989284	9076914	+	inside	7892	7892	NearestLocation	Ahnak
chr19	10282422	10290894	8473	2	1	2	4	seq_152201	FALSE	269060	10245265	10304877	-	inside	22455	13983	NearestLocation	Dagla
chr19	10849655	10856773	7119	3	2	0	3	seq_152276	FALSE	65221	10842544	10859362	+	inside	7111	2589	NearestLocation	Slc15a3
chr19	11171902	11183031	11130	1	2	4	1	seq_152320	FALSE	69416	11139664	11165320	-	upstream	-6582	6582	NearestLocation	Ms4a19
chr19	12932676	12945770	13095	3	2	1	2	seq_152540	FALSE	258300	12934737	12935684	+	includeFeature	-2061	2061	NearestLocation	Olfr1449
chr19	22935978	22947945	11968	4	5	2	1	seq_153808	FALSE	387200	22750605	22750672	+	downstream	185373	185306	NearestLocation	Mir204
chr19	25329850	25342033	12184	1	1	2	5	seq_154122	FALSE	107351	25236975	25434496	+	inside	92875	92463	NearestLocation	Kank1
chr19	25406242	25412797	6556	2	4	1	1	seq_154133	FALSE	50796	25505618	25604329	+	upstream	-99376	92821	NearestLocation	Dmrt1
chr19	26370985	26383451	12467	3	1	2	3	seq_154259	FALSE	67155	26605050	26778322	+	upstream	-234065	221599	NearestLocation	Smarca2
chr19	27251562	27260354	8793	3	1	3	1	seq_154387	FALSE	22359	27216484	27254231	+	overlapEnd	35078	2669	NearestLocation	Vldlr
chr19	27336356	27347059	10704	1	0	8	3	seq_154398	FALSE	240595	27322588	27337179	+	overlapEnd	13768	823	NearestLocation	Kcnv2
chr19	28473658	28482623	8966	4	1	0	3	seq_154549	FALSE	320176	28678224	28720027	+	upstream	-204566	195601	NearestLocation	D930032P07Rik
chr19	31704295	31715763	11469	3	1	2	2	seq_154955	FALSE	19091	30564489	31765033	-	inside	60738	49270	NearestLocation	Prkg1
chr19	33721744	33736325	14582	1	2	1	5	seq_155198	FALSE	101055671	33719670	33751359	-	inside	29615	2074	NearestLocation	Lipo2
chr19	37438392	37446497	8106	3	3	1	2	seq_155676	FALSE	15242	37434810	37440731	+	overlapEnd	3582	2339	NearestLocation	Hhex
chr19	38134813	38145500	10688	2	1	2	4	seq_155763	FALSE	110855	38132781	38183958	+	inside	2032	2032	NearestLocation	Pde6c
chr19	41635845	41644349	8505	1	1	3	4	seq_156212	FALSE	102465884	41588651	41588789	+	downstream	47194	47056	NearestLocation	Mir8091
chr19	41928029	41937286	9258	4	0	2	2	seq_156255	FALSE	74168	41933480	41944104	+	overlapStart	-5451	3806	NearestLocation	Zdhhc16
chr19	44511509	44520533	9025	4	1	2	2	seq_156604	FALSE	22423	44493472	44514273	+	overlapEnd	18037	2764	NearestLocation	Wnt8b
chr19	45254631	45263023	8393	4	0	1	3	seq_156701	FALSE	16814	45232684	45235812	-	upstream	-18819	18819	NearestLocation	Lbx1
chr19	46873443	46884647	11205	0	2	3	3	seq_156913	FALSE	94219	46761596	46880192	+	overlapEnd	111847	4455	NearestLocation	Cnnm2
chr19	47969942	47982806	12865	3	1	3	2	seq_157069	FALSE	381229	47937675	48035387	+	inside	32267	32267	NearestLocation	Cfap58
chr19	49147550	49157589	10040	5	1	2	1	seq_157222	FALSE	66673	48206025	48805505	+	downstream	941525	342045	NearestLocation	Sorcs3
chr19	54343532	54359031	15500	4	2	2	3	seq_157872	FALSE	11551	54044151	54048982	+	downstream	299381	294550	NearestLocation	Adra2a
chr19	57631089	57641585	10497	1	3	3	2	seq_158292	TRUE	226255	57611034	58133343	+	inside	20055	20055	NearestLocation	Atrnl1
chr19	58110691	58118325	7635	12	11	5	9	seq_158360	TRUE	100885835	58051167	58051236	+	downstream	59524	59455	NearestLocation	Mir5623
chr19	58151576	58161596	10021	0	4	1	3	seq_158366	FALSE	100885835	58051167	58051236	+	downstream	100409	100340	NearestLocation	Mir5623
chr19	59732380	59744224	11845	3	2	2	3	seq_158564	FALSE	74998	59902884	59943654	-	downstream	211274	158660	NearestLocation	Rab11fip2
chr2	4660339	4673423	13085	0	3	2	4	seq_159000	FALSE	67229	4622058	4652113	-	upstream	-8226	8226	NearestLocation	Prpf18
chr2	6136608	6146537	9930	2	1	3	2	seq_159198	FALSE	100038358	6132869	6140568	+	overlapEnd	3739	3739	NearestLocation	Gm10857
chr2	6514455	6524774	10320	3	1	1	3	seq_159257	FALSE	98910	6322667	6446390	+	downstream	191788	68065	NearestLocation	Usp6nl
chr2	8269885	8279054	9170	1	1	3	3	seq_159476	TRUE	14007	6539694	7509563	-	upstream	-760322	760322	NearestLocation	Celf2
chr2	10791465	10802760	11296	3	0	3	2	seq_159801	FALSE	100316831	10518155	10518279	+	downstream	273310	273186	NearestLocation	Mir669h
chr2	11210564	11222066	11503	5	0	2	3	seq_159859	FALSE	18761	11172108	11301222	+	inside	38456	38456	NearestLocation	Prkcq
chr2	11292574	11303067	10494	3	1	2	2	seq_159869	FALSE	100503147	11339488	11344111	+	upstream	-46914	36421	NearestLocation	Gm13293
chr2	11734543	11742095	7553	4	3	1	0	seq_159937	FALSE	16169	11705290	11734317	+	downstream	29253	226	NearestLocation	Il15ra
chr2	13091880	13107452	15573	3	4	4	1	seq_160113	FALSE	227580	13003457	13011806	-	upstream	-80074	80074	NearestLocation	C1ql3
chr2	13116052	13126537	10486	4	1	0	4	seq_160115	FALSE	227580	13003457	13011806	-	upstream	-104246	104246	NearestLocation	C1ql3
chr2	15775948	15787757	11810	1	2	3	2	seq_160440	FALSE	102635496	15526479	16255555	+	inside	249469	249469	NearestLocation	Malrd1
chr2	18999826	19009877	10052	1	2	3	2	seq_160860	FALSE	74629	18998343	18999804	+	downstream	1483	22	NearestLocation	4930426L09Rik
chr2	19213738	19225389	11652	0	0	2	6	seq_160893	FALSE	70882	19199302	19310241	+	inside	14436	14436	NearestLocation	Armc3
chr2	20211385	20225704	14320	2	5	1	4	seq_161013	FALSE	208618	19909780	20810713	+	inside	301605	301605	NearestLocation	Etl4
chr2	21206745	21217928	11184	2	1	4	2	seq_161149	FALSE	208967	21205724	21215009	+	overlapEnd	1021	1021	NearestLocation	Thnsl1
chr2	24123036	24135382	12347	2	3	3	2	seq_161520	FALSE	69677	24153161	24160519	+	upstream	-30125	17779	NearestLocation	Il1f8
chr2	24140367	24150787	10421	2	2	3	1	seq_161521	FALSE	69677	24153161	24160519	+	upstream	-12794	2374	NearestLocation	Il1f8
chr2	24748237	24761120	12884	2	1	1	4	seq_161606	FALSE	12287	24603887	24763152	-	inside	14915	2032	NearestLocation	Cacna1b
chr2	25331920	25343963	12044	1	4	0	3	seq_161694	FALSE	227619	25332338	25352212	+	overlapStart	-418	418	NearestLocation	Man1b1
chr2	27740366	27749784	9419	4	1	2	1	seq_162034	FALSE	20181	27676440	27762957	+	inside	63926	13173	NearestLocation	Rxra
chr2	28261056	28269162	8107	1	2	1	5	seq_162103	FALSE	56177	28192992	28230736	+	downstream	68064	30320	NearestLocation	Olfm1
chr2	28721493	28732781	11289	2	3	2	2	seq_162172	FALSE	100526498	28733278	28733351	+	upstream	-11785	497	NearestLocation	Mir3088
chr2	31526792	31536089	9298	1	2	1	4	seq_162573	FALSE	432466	31497772	31520531	+	downstream	29020	6261	NearestLocation	Gm5424
chr2	31884720	31897032	12313	3	0	4	1	seq_162625	FALSE	23928	31887291	31946539	+	overlapStart	-2571	2571	NearestLocation	Lamc3
chr2	32561077	32577490	16414	3	0	5	2	seq_162714	FALSE	227733	32575718	32583782	+	overlapStart	-14641	1772	NearestLocation	Pip5kl1
chr2	32884009	32895282	11274	1	1	2	4	seq_162758	FALSE	227737	32876114	32925254	+	inside	7895	7895	NearestLocation	Fam129b
chr2	33012789	33020471	7683	2	1	1	4	seq_162774	FALSE	56017	32972990	32982083	-	upstream	-30706	30706	NearestLocation	Slc2a8
chr2	33101769	33110637	8869	2	2	3	2	seq_162788	FALSE	99326	32986224	33131654	-	inside	29885	21017	NearestLocation	Garnl3
chr2	35674767	35689823	15057	1	4	1	3	seq_163146	FALSE	100042194	35549538	35558702	-	upstream	-116065	116065	NearestLocation	Gm13446
chr2	35958592	35971022	12431	1	4	1	2	seq_163190	FALSE	74410	35751241	35979913	-	inside	21321	8891	NearestLocation	Ttll11
chr2	36618558	36629934	11377	1	5	3	1	seq_163280	FALSE	258947	36640041	36640976	+	upstream	-21483	10107	NearestLocation	Olfr345
chr2	37162694	37169609	6916	3	0	3	2	seq_163353	TRUE	258656	37201243	37202181	+	upstream	-38549	31634	NearestLocation	Olfr365
chr2	38411999	38425241	13243	1	0	2	6	seq_163510	FALSE	16870	38339281	38369733	+	downstream	72718	42266	NearestLocation	Lhx2
chr2	40420765	40434315	13551	1	3	3	1	seq_163761	FALSE	67857	39194354	39226451	-	upstream	-1194314	1194314	NearestLocation	Ppp6c
chr2	41194739	41208307	13569	0	2	2	4	seq_163852	FALSE	102465171	42447439	42447568	-	downstream	1252829	1239132	NearestLocation	Mir6336
chr2	48369281	48377797	8517	4	1	2	1	seq_164754	FALSE	11480	48814109	48903269	+	upstream	-444828	436312	NearestLocation	Acvr2a
chr2	48690781	48703346	12566	3	0	5	6	seq_164792	FALSE	11480	48814109	48903269	+	upstream	-123328	110763	NearestLocation	Acvr2a
chr2	51620546	51631362	10817	2	2	2	2	seq_165181	FALSE	387511	51627511	51628408	+	includeFeature	-6965	2954	NearestLocation	Tas2r134
chr2	53027031	53035937	8907	5	1	1	2	seq_165372	FALSE	56194	53134704	53191284	-	downstream	164253	98767	NearestLocation	Prpf40a
chr2	70843806	70858848	15043	1	5	2	4	seq_167637	FALSE	228012	70712407	70825728	-	upstream	-18078	18078	NearestLocation	Tlk1
chr2	71802241	71813613	11373	3	1	4	1	seq_167755	FALSE	16403	71745616	71858416	+	inside	56625	44803	NearestLocation	Itga6
chr2	72023773	72033330	9558	2	2	2	3	seq_167782	FALSE	56508	71981240	72257474	+	inside	42533	42533	NearestLocation	Rapgef4
chr2	73492739	73505577	12839	1	3	2	3	seq_167995	FALSE	215280	73429610	73529734	-	inside	36995	24157	NearestLocation	Wipf1
chr2	76734777	76747101	12325	3	2	3	4	seq_168425	FALSE	83435	76675281	76696828	+	downstream	59496	37949	NearestLocation	Plekha3
chr2	77978255	77991907	13653	4	1	1	3	seq_168598	FALSE	80744	77881159	77946375	-	upstream	-31880	31880	NearestLocation	Cwc22
chr2	80606406	80613466	7061	2	1	0	5	seq_168916	FALSE	68082	80617045	80632361	+	upstream	-10639	3579	NearestLocation	Dusp19
chr2	89421456	89430366	8911	2	0	3	3	seq_169984	FALSE	258972	89417494	89418411	-	upstream	-3045	3045	NearestLocation	Olfr1239
chr2	90925513	90935250	9738	3	0	3	3	seq_170157	FALSE	13046	90940382	91019497	+	upstream	-14869	5132	NearestLocation	Celf1
chr2	93228543	93238197	9655	2	0	2	4	seq_170479	FALSE	277414	93187548	93201759	+	downstream	40995	26784	NearestLocation	Trp53i11
chr2	94709186	94717942	8757	1	0	2	5	seq_170696	FALSE	11800	94411682	94438136	-	upstream	-271050	271050	NearestLocation	Api5
chr2	94872329	94884272	11944	1	1	3	3	seq_170719	TRUE	11800	94411682	94438136	-	upstream	-434193	434193	NearestLocation	Api5
chr2	98661228	98669875	8648	14360	10690	13618	14881	seq_171180	TRUE	241568	96318169	97631666	+	downstream	2343059	1029562	NearestLocation	Lrrc4c
chr2	98762852	98773312	10461	4	2	3	1	seq_171195	FALSE	241568	96318169	97631666	+	downstream	2444683	1131186	NearestLocation	Lrrc4c
chr2	101773764	101784509	10746	2	0	5	1	seq_171532	FALSE	22034	101678429	101701669	+	downstream	95335	72095	NearestLocation	Traf6
chr2	103050950	103061077	10128	3	2	2	1	seq_171703	FALSE	27402	103021075	103073513	-	inside	22563	12436	NearestLocation	Pdhx
chr2	104345896	104360141	14246	2	2	3	2	seq_171889	FALSE	241589	104143073	104411013	-	inside	65117	50872	NearestLocation	D430041D05Rik
chr2	106666249	106674772	8524	4	1	0	3	seq_172187	FALSE	102640562	106642914	106650364	-	upstream	-15885	15885	NearestLocation	BB218582
chr2	114086643	114101239	14597	1	3	2	5	seq_173116	FALSE	11464	114047282	114053548	-	upstream	-33095	33095	NearestLocation	Actc1
chr2	116554485	116563642	9158	4	1	3	4	seq_173461	FALSE	67356	116878691	116892494	+	upstream	-324206	315049	NearestLocation	Tmco5
chr2	117054629	117069410	14782	4	0	2	3	seq_173532	FALSE	114715	117121374	117182279	+	upstream	-66745	51964	NearestLocation	Spred1
chr2	117279335	117297102	17768	2	3	2	3	seq_173560	FALSE	68215	117249739	117271540	+	downstream	29596	7795	NearestLocation	Fam98b
chr2	118678614	118692117	13504	3	2	1	2	seq_173759	FALSE	383787	118699103	118703963	-	downstream	25349	6986	NearestLocation	Ankrd63
chr2	120189397	120200696	11300	4	2	1	1	seq_173964	FALSE	98878	120089175	120154606	-	upstream	-34791	34791	NearestLocation	Ehd4
chr2	120638863	120647170	8308	2	2	4	2	seq_174030	TRUE	668880	120629121	120731895	+	inside	9742	9742	NearestLocation	Stard9
chr2	124113637	124122195	8559	0	4	3	2	seq_174482	FALSE	74702	124123636	124129956	-	downstream	16319	1441	NearestLocation	4930517E11Rik
chr2	126588037	126601077	13041	0	2	4	3	seq_174835	FALSE	15186	126593667	126619299	-	overlapEnd	31262	5630	NearestLocation	Hdc
chr2	131193078	131204795	11718	3	3	2	1	seq_175421	FALSE	69596	131207078	131213514	+	upstream	-14000	2283	NearestLocation	Ap5s1
chr2	142080067	142094561	14495	1	2	4	2	seq_176823	FALSE	16558	142617474	142901531	-	downstream	821464	522913	NearestLocation	Kif16b
chr2	142528042	142539746	11705	1	2	4	2	seq_176878	FALSE	16558	142617474	142901531	-	downstream	373489	77728	NearestLocation	Kif16b
chr2	143490546	143498846	8301	1	2	2	3	seq_177007	FALSE	18549	143546156	143816285	+	upstream	-55610	47310	NearestLocation	Pcsk2
chr2	143959852	143971627	11776	3	4	1	1	seq_177069	FALSE	81910	143947395	144011263	-	inside	51411	12457	NearestLocation	Rrbp1
chr2	148418425	148425627	7203	3	0	2	3	seq_177668	FALSE	21824	148404466	148408188	-	upstream	-10237	10237	NearestLocation	Thbd
chr2	148478801	148490447	11647	1	3	2	3	seq_177674	FALSE	17064	148436640	148443563	-	upstream	-35238	35238	NearestLocation	Cd93
chr2	149844477	149855565	11089	2	4	2	1	seq_177861	FALSE	433485	149829211	150004392	+	inside	15266	15266	NearestLocation	Syndig1
chr2	152244466	152254364	9899	3	2	1	2	seq_178170	FALSE	12995	152226839	152281852	+	inside	17627	17627	NearestLocation	Csnk2a1
chr2	152767902	152776250	8349	4	1	1	2	seq_178236	FALSE	84682	152754173	152765037	+	downstream	13729	2865	NearestLocation	Cox4i2
chr2	153751745	153762915	11171	1	1	4	3	seq_178365	FALSE	13589	153741274	153773310	+	inside	10471	10395	NearestLocation	Mapre1
chr2	155271691	155285916	14226	3	1	6	4	seq_178576	FALSE	66734	155276297	155278073	+	includeFeature	-4606	4606	NearestLocation	Map1lc3a
chr2	157251220	157261650	10431	3	1	1	5	seq_178853	FALSE	20014	157279017	157326319	+	upstream	-27797	17367	NearestLocation	Rpn2
chr2	157828672	157839557	10886	2	1	2	3	seq_178934	TRUE	277432	157914653	157944719	+	upstream	-85981	75096	NearestLocation	Vstm2l
chr2	158025628	158035434	9807	2	3	5	1	seq_178962	FALSE	75425	157981803	158028433	-	overlapStart	2805	2805	NearestLocation	Tti1
chr2	159000512	159011693	11182	4	0	2	3	seq_179091	FALSE	71715	158794807	158858214	+	downstream	205705	142298	NearestLocation	Dhx35
chr2	165630581	165641103	10523	1	2	4	1	seq_180036	FALSE	14049	165595032	165771727	+	inside	35549	35549	NearestLocation	Eya2
chr2	167276817	167288741	11925	1	1	5	3	seq_180276	TRUE	19223	167191805	167240604	-	upstream	-36213	36213	NearestLocation	Ptgis
chr2	169496909	169504114	7206	2	2	2	2	seq_180563	FALSE	228911	169633013	170071816	+	upstream	-136104	128899	NearestLocation	Tshz2
chr2	169599004	169612557	13554	5	1	4	1	seq_180576	FALSE	228911	169633013	170071816	+	upstream	-34009	20456	NearestLocation	Tshz2
chr2	169727266	169740279	13014	3	2	2	1	seq_180596	FALSE	228911	169633013	170071816	+	inside	94253	94253	NearestLocation	Tshz2
chr2	170299615	170309991	10377	1	2	5	0	seq_180678	FALSE	73303	170356361	170380435	+	upstream	-56746	46370	NearestLocation	Bcas1os2
chr2	173987119	174002177	15059	2	3	3	5	seq_181176	FALSE	228960	174076308	174099771	+	upstream	-89189	74131	NearestLocation	Stx16
chr2	174510887	174527142	16256	2	3	3	3	seq_181251	FALSE	66390	174465067	174473081	-	upstream	-37806	37806	NearestLocation	Prelid3b
chr2	174652129	174661992	9864	3	0	3	3	seq_181270	FALSE	100043757	174643534	174710832	+	inside	8595	8595	NearestLocation	Zfp831
chr2	174894611	174909839	15229	2	2	3	5	seq_181301	FALSE	13616	174760619	174784042	+	downstream	133992	110569	NearestLocation	Edn3
chr2	177312459	177327619	15161	6	1	4	2	seq_181386	TRUE	628308	177464733	177478129	+	upstream	-152274	137114	NearestLocation	Zfp970
chr2	178481165	178488920	7756	4	1	2	1	seq_181519	FALSE	381409	178430531	178487366	+	overlapEnd	50634	1554	NearestLocation	Cdh26
chr2	180265737	180277291	11555	4	3	2	1	seq_181767	FALSE	252966	180258540	180273496	-	overlapStart	7759	3795	NearestLocation	Cables2
chr2	180858483	180870415	11933	2	4	2	1	seq_181858	FALSE	723951	180894040	180895220	+	upstream	-35557	23625	NearestLocation	Mir124a-3
chr2	181916328	181922425	6098	5	4	3	6	seq_182021	TRUE	67005	181864337	181870830	+	downstream	51991	45498	NearestLocation	Polr3k
chr2	181923338	181933504	10167	5	2	4	2	seq_182022	TRUE	672125	181991129	182003861	+	upstream	-67791	57625	NearestLocation	Gm14496
chr3	3006966	3020004	13039	7	1	6	2	seq_182036	TRUE	30942	3508030	3658052	+	upstream	-501064	488026	NearestLocation	Hnf4g
chr3	3022249	3026435	4187	1	2	3	2	seq_182037	TRUE	30942	3508030	3658052	+	upstream	-485781	481595	NearestLocation	Hnf4g
chr3	4731220	4743692	12473	2	1	2	3	seq_182262	FALSE	100503859	4798708	4814911	+	upstream	-67488	55016	NearestLocation	1110015O18Rik
chr3	5859338	5861790	2453	0	5	2	1	seq_182398	TRUE	19302	5560188	5576239	-	upstream	-283099	283099	NearestLocation	Pex2
chr3	8244246	8248595	4350	1	2	4	7	seq_182697	TRUE	620966	8462228	8463035	-	downstream	218789	213633	NearestLocation	Gm6194
chr3	9548391	9565017	16627	4	0	4	4	seq_182866	FALSE	170753	9427020	9610085	-	inside	61694	45068	NearestLocation	Zfp704
chr3	9696496	9709012	12517	0	3	3	5	seq_182888	FALSE	170753	9427020	9610085	-	upstream	-86411	86411	NearestLocation	Zfp704
chr3	10497671	10510603	12933	4	0	4	2	seq_182987	FALSE	74718	10417817	10440102	-	upstream	-57569	57569	NearestLocation	Snx16
chr3	15586587	15596258	9672	3	1	3	2	seq_183633	TRUE	668101	15495751	15575065	-	upstream	-11522	11522	NearestLocation	Sirpb1b
chr3	15866470	15875892	9423	8	1	0	0	seq_183655	TRUE	100038947	15795145	15848528	-	upstream	-17942	17942	NearestLocation	Sirpb1c
chr3	16226658	16237761	11104	2	3	3	2	seq_183701	FALSE	229096	16183212	16217037	+	downstream	43446	9621	NearestLocation	Ythdf3
chr3	16475970	16486700	10731	3	2	4	1	seq_183737	FALSE	229096	16183212	16217037	+	downstream	292758	258933	NearestLocation	Ythdf3
chr3	18440293	18449197	8905	1	2	3	2	seq_183969	FALSE	73959	18468287	18480477	-	downstream	40184	19090	NearestLocation	4930433B08Rik
chr3	18901702	18917846	16145	3	1	5	4	seq_184022	FALSE	74252	19131402	19163065	-	downstream	261363	213556	NearestLocation	Armc1
chr3	19738078	19751326	13249	2	4	1	5	seq_184129	FALSE	12918	19693401	19695396	-	upstream	-42682	42682	NearestLocation	Crh
chr3	27500118	27508557	8440	2	1	2	3	seq_185106	FALSE	100526525	27584900	27584995	-	downstream	84877	76343	NearestLocation	Mir3092
chr3	27851558	27862615	11058	2	3	1	2	seq_185154	FALSE	208613	27866066	27896368	-	downstream	44810	3451	NearestLocation	Tmem212
chr3	27968737	27979631	10895	3	1	1	3	seq_185171	FALSE	18805	27938695	28133362	+	inside	30042	30042	NearestLocation	Pld1
chr3	28160579	28170539	9961	4	1	2	4	seq_185193	FALSE	665113	28263214	28675858	+	upstream	-102635	92675	NearestLocation	Tnik
chr3	29918071	29927466	9396	2	2	2	2	seq_185418	FALSE	102636083	29891014	29924191	+	overlapEnd	27057	3275	NearestLocation	Mannr
chr3	31203470	31215169	11700	4	2	1	4	seq_185587	FALSE	18417	31149920	31164324	+	downstream	53550	39146	NearestLocation	Cldn11
chr3	33308134	33318391	10258	1	0	2	6	seq_185869	FALSE	58869	32949408	33143247	-	upstream	-164887	164887	NearestLocation	Pex5l
chr3	33613236	33625686	12451	3	2	0	6	seq_185910	FALSE	67120	33799832	33814860	+	upstream	-186596	174146	NearestLocation	Ttc14
chr3	33843204	33851868	8665	2	2	4	1	seq_185938	FALSE	51938	33812362	33844310	-	overlapStart	1106	1106	NearestLocation	Ccdc39
chr3	44166459	44175243	8785	1	3	1	4	seq_187270	FALSE	72511	45280437	45378260	-	downstream	1211801	1105194	NearestLocation	2610316D01Rik
chr3	50283055	50292730	9676	4	1	2	1	seq_187972	FALSE	26570	49892526	50443614	-	inside	160559	150884	NearestLocation	Slc7a11
chr3	53105033	53115177	10145	1	0	2	5	seq_188356	FALSE	108927	53041528	53261679	+	inside	63505	63505	NearestLocation	Lhfp
chr3	53894405	53911825	17421	0	4	4	3	seq_188454	FALSE	67890	53853376	53863830	-	upstream	-30575	30575	NearestLocation	Ufm1
chr3	56574469	56578584	4116	5	6	2	2	seq_188797	TRUE	26422	55625195	56183701	-	upstream	-390768	390768	NearestLocation	Nbea
chr3	62677612	62687703	10092	2	1	1	4	seq_189573	FALSE	229357	62529077	62605140	-	upstream	-72472	72472	NearestLocation	Gpr149
chr3	69976723	69986623	9901	2	3	1	2	seq_190526	FALSE	229389	70007613	70028708	+	upstream	-30890	20990	NearestLocation	Otol1
chr3	79248757	79261718	12962	1	1	3	3	seq_191622	FALSE	76089	79062516	79286517	-	inside	37760	24799	NearestLocation	Rapgef2
chr3	79399019	79410659	11641	1	1	6	0	seq_191645	FALSE	100233207	79336661	79464129	+	inside	62358	53470	NearestLocation	Gm17359
chr3	83224238	83233534	9297	3	1	1	3	seq_192138	FALSE	100038599	83125276	83129246	-	upstream	-94992	94992	NearestLocation	Gm10710
chr3	83316037	83329290	13254	4	3	0	2	seq_192152	FALSE	100038599	83125276	83129246	-	upstream	-186791	186791	NearestLocation	Gm10710
chr3	84471628	84481065	9438	2	2	1	3	seq_192309	FALSE	229474	84442198	84480429	-	overlapStart	8801	636	NearestLocation	Fhdc1
chr3	85147601	85158608	11008	3	1	3	2	seq_192400	FALSE	73283	85317519	85332030	+	upstream	-169918	158911	NearestLocation	1700036G14Rik
chr3	85349817	85366905	17089	2	3	7	2	seq_192428	FALSE	73283	85317519	85332030	+	downstream	32298	17787	NearestLocation	1700036G14Rik
chr3	87571065	87582121	11057	2	0	1	5	seq_192734	FALSE	546801	87550099	87561109	+	downstream	20966	9956	NearestLocation	Etv3l
chr3	88040543	88052821	12279	1	3	3	3	seq_192797	TRUE	66614	88043108	88055993	+	overlapStart	-2565	2565	NearestLocation	Gpatch4
chr3	91887270	91898067	10798	3	4	3	0	seq_193311	TRUE	242100	92014583	92031582	+	upstream	-127313	116516	NearestLocation	Pglyrp3
chr3	94980341	94989314	8974	3	2	3	1	seq_193712	FALSE	107650	94974731	95006843	+	inside	5610	5610	NearestLocation	Pi4kb
chr3	97164672	97173591	8920	2	0	5	2	seq_193989	FALSE	66659	97158777	97176574	+	inside	5895	2983	NearestLocation	Acp6
chr3	98308362	98319769	11408	3	2	3	1	seq_194149	FALSE	236539	98313170	98339990	-	overlapEnd	31628	4808	NearestLocation	Phgdh
chr3	99977759	99983320	5562	2	1	3	2	seq_194363	TRUE	74362	99885406	100143322	+	inside	92353	92353	NearestLocation	Spag17
chr3	101517637	101526139	8503	1	2	2	3	seq_194571	FALSE	11928	101576219	101604684	-	downstream	87047	50080	NearestLocation	Atp1a1
chr3	105720444	105727883	7440	1	2	3	3	seq_195118	FALSE	109050	105704599	105720842	+	overlapEnd	15845	398	NearestLocation	Inka2
chr3	107945886	107956127	10242	2	1	1	4	seq_195432	FALSE	14867	107938847	107943749	-	upstream	-2137	2137	NearestLocation	Gstm6
chr3	116077479	116085966	8488	5	1	1	1	seq_196378	FALSE	22329	116109949	116129688	-	downstream	52209	23983	NearestLocation	Vcam1
chr3	116970711	116979205	8495	1	2	2	3	seq_196485	FALSE	114301	116918258	116968987	-	upstream	-1724	1724	NearestLocation	Palmd
chr3	117476155	117487436	11282	2	2	1	5	seq_196552	FALSE	75769	117574836	117689507	+	upstream	-98681	87400	NearestLocation	Plppr5
chr3	122309373	122317793	8421	3	2	1	2	seq_197162	TRUE	29815	122294136	122530191	+	inside	15237	15237	NearestLocation	Bcar3
chr3	122436244	122448285	12042	1	1	1	5	seq_197177	FALSE	102465764	122541625	122541681	-	downstream	105437	93340	NearestLocation	Mir7657
chr3	128854580	128865540	10961	0	2	3	4	seq_197970	FALSE	18741	129199878	129219591	+	upstream	-345298	334338	NearestLocation	Pitx2
chr3	128983523	128998428	14906	5	1	0	5	seq_197989	FALSE	18741	129199878	129219591	+	upstream	-216355	201450	NearestLocation	Pitx2
chr3	130385819	130393723	7905	1	2	2	3	seq_198176	FALSE	71760	130617448	130637521	+	upstream	-231629	223725	NearestLocation	Etnppl
chr3	131318204	131326687	8484	2	2	4	0	seq_198294	FALSE	71519	131288441	131303227	-	upstream	-14977	14977	NearestLocation	Cyp2u1
chr3	135653286	135664595	11310	2	3	3	0	seq_198837	FALSE	18033	135584655	135691547	-	inside	38261	26952	NearestLocation	Nfkb1
chr3	137199712	137210215	10504	1	2	4	1	seq_199043	FALSE	229861	137289639	137300708	+	upstream	-89927	79424	NearestLocation	Gm567
chr3	138104695	138114657	9963	1	3	1	3	seq_199152	FALSE	17777	138089854	138143388	-	inside	38693	14841	NearestLocation	Mttp
chr3	138308714	138322551	13838	3	2	4	3	seq_199178	FALSE	69117	138313286	138331134	+	overlapStart	-4572	4572	NearestLocation	Adh6a
chr3	141459294	141472148	12855	2	0	4	4	seq_199575	FALSE	22253	141465216	141834924	+	overlapStart	-5922	5922	NearestLocation	Unc5c
chr3	142220600	142231367	10768	1	2	1	4	seq_199677	FALSE	12167	141837136	142169425	-	upstream	-51175	51175	NearestLocation	Bmpr1b
chr3	143988781	143998181	9401	2	3	2	4	seq_199912	FALSE	16911	144188530	144205220	-	downstream	216439	190349	NearestLocation	Lmo4
chr3	144129951	144140775	10825	4	2	3	0	seq_199930	FALSE	16911	144188530	144205220	-	downstream	75269	47755	NearestLocation	Lmo4
chr3	147826189	147835800	9612	3	3	2	0	seq_200412	FALSE	70892	146852367	146984009	+	downstream	973822	842180	NearestLocation	Ttll7
chr3	151908479	151919605	11127	2	1	2	4	seq_200918	FALSE	19220	151796502	151837630	-	upstream	-70849	70849	NearestLocation	Ptgfr
chr3	156820212	156827499	7288	1	2	5	0	seq_201565	FALSE	320840	156561794	157316445	+	inside	258418	258418	NearestLocation	Negr1
chr4	3049000	3072637	23638	17	15	14	17	seq_201957	TRUE	100312470	3172083	3173003	+	upstream	-123083	99446	NearestLocation	Vmn1r2
chr4	3075526	3087561	12036	12	9	13	10	seq_201958	TRUE	100312470	3172083	3173003	+	upstream	-96557	84522	NearestLocation	Vmn1r2
chr4	3088849	3092125	3277	3	5	2	1	seq_201959	TRUE	100312470	3172083	3173003	+	upstream	-83234	79958	NearestLocation	Vmn1r2
chr4	3143848	3150518	6671	2	2	1	3	seq_201966	TRUE	100312470	3172083	3173003	+	upstream	-28235	21565	NearestLocation	Vmn1r2
chr4	3222242	3230734	8493	2	1	2	4	seq_201975	TRUE	100312471	3184348	3185358	-	upstream	-36884	36884	NearestLocation	Vmn1r3
chr4	3234878	3242530	7653	2	1	4	2	seq_201976	TRUE	100312471	3184348	3185358	-	upstream	-49520	49520	NearestLocation	Vmn1r3
chr4	5334601	5345836	11236	1	3	3	4	seq_202244	FALSE	73872	5632328	5642284	+	upstream	-297727	286492	NearestLocation	4930423M02Rik
chr4	5928025	5937697	9673	3	1	1	3	seq_202326	FALSE	68053	6191098	6221688	+	upstream	-263073	253401	NearestLocation	Ubxn2b
chr4	5998600	6012247	13648	1	1	2	5	seq_202335	FALSE	68053	6191098	6221688	+	upstream	-192498	178851	NearestLocation	Ubxn2b
chr4	7108170	7120628	12459	1	2	3	2	seq_202482	FALSE	252838	6686353	6991557	-	upstream	-116613	116613	NearestLocation	Tox
chr4	7234027	7247217	13191	1	3	3	2	seq_202497	FALSE	252838	6686353	6991557	-	upstream	-242470	242470	NearestLocation	Tox
chr4	8607709	8620572	12864	0	1	4	5	seq_202669	FALSE	320790	8690406	8867659	+	upstream	-82697	69834	NearestLocation	Chd7
chr4	10162517	10175881	13365	2	3	1	4	seq_202867	FALSE	74662	9915965	9917635	-	upstream	-244882	244882	NearestLocation	4930448K20Rik
chr4	10343722	10358603	14882	1	4	1	3	seq_202891	FALSE	74662	9915965	9917635	-	upstream	-426087	426087	NearestLocation	4930448K20Rik
chr4	12995870	13008440	12571	2	0	3	3	seq_203241	FALSE	208820	12906838	12983553	+	downstream	89032	12317	NearestLocation	Triqk
chr4	14832939	14844317	11379	2	2	1	3	seq_203482	FALSE	72201	14809498	14826587	-	upstream	-6352	6352	NearestLocation	Otud6b
chr4	15223809	15233730	9922	2	0	4	2	seq_203521	FALSE	100201	15265831	15286753	+	upstream	-42022	32101	NearestLocation	Tmem64
chr4	17845671	17854519	8849	2	1	4	3	seq_203828	FALSE	17389	17852893	18119145	+	overlapStart	-7222	1626	NearestLocation	Mmp16
chr4	29232448	29242887	10440	4	2	1	1	seq_205231	FALSE	102634169	29068079	29088811	+	downstream	164369	143637	NearestLocation	Gm11917
chr4	30428972	30441041	12070	1	2	3	3	seq_205371	FALSE	102634169	29068079	29088811	+	downstream	1360893	1340161	NearestLocation	Gm11917
chr4	31736938	31744896	7959	1	2	3	2	seq_205520	FALSE	26409	31964097	32023467	+	upstream	-227159	219201	NearestLocation	Map3k7
chr4	33455569	33465595	10027	2	1	2	4	seq_205725	FALSE	102465904	33438081	33438209	+	downstream	17488	17360	NearestLocation	Mir8118
chr4	36541953	36553498	11546	3	1	3	1	seq_206117	FALSE	100124458	36645373	36645453	-	downstream	103500	91875	NearestLocation	Mir876
chr4	40074879	40083737	8859	1	4	1	2	seq_206549	FALSE	11428	40143081	40198338	+	upstream	-68202	59344	NearestLocation	Aco1
chr4	40458195	40468108	9914	2	0	4	2	seq_206602	FALSE	320500	40472180	40477168	+	upstream	-13985	4072	NearestLocation	Tmem215
chr4	40494974	40503496	8523	1	0	3	5	seq_206607	FALSE	71293	40482840	40525548	-	inside	30574	12134	NearestLocation	4933428C19Rik
chr4	41549145	41556645	7501	2	0	2	4	seq_206747	FALSE	71901	41517691	41569538	-	inside	20393	12893	NearestLocation	Fam219a
chr4	41741370	41753642	12273	2	2	1	3	seq_206774	FALSE	14430	41755228	41758695	+	upstream	-13858	1586	NearestLocation	Galt
chr4	43859911	43873693	13783	3	1	3	1	seq_206933	FALSE	53614	43875530	43944806	+	upstream	-15619	1837	NearestLocation	Reck
chr4	44159442	44171576	12135	4	2	2	1	seq_206978	FALSE	100628618	44221195	44221267	-	downstream	61825	49619	NearestLocation	Mir5106
chr4	47224754	47238485	13732	2	1	4	2	seq_207390	FALSE	12819	47208161	47313167	+	inside	16593	16593	NearestLocation	Col15a1
chr4	52450796	52460408	9613	1	1	4	2	seq_208067	FALSE	14211	52439243	52488260	+	inside	11553	11553	NearestLocation	Smc2
chr4	56538366	56551704	13339	6	0	3	1	seq_208607	FALSE	11471	56740005	56741443	-	downstream	203077	188301	NearestLocation	Actl7b
chr4	56595547	56603587	8041	2	1	2	3	seq_208614	FALSE	11471	56740005	56741443	-	downstream	145896	136418	NearestLocation	Actl7b
chr4	58689834	58699742	9909	1	0	5	2	seq_208909	FALSE	258922	58784779	58785722	-	downstream	95888	85037	NearestLocation	Olfr267
chr4	59379089	59390352	11264	3	1	0	4	seq_209000	FALSE	634731	59314683	59438633	-	inside	59544	48281	NearestLocation	Susd1
chr4	59994382	60008120	13739	3	2	3	2	seq_209081	FALSE	620807	59964294	60007274	+	overlapEnd	30088	846	NearestLocation	Mup6
chr4	61799201	61810855	11655	0	3	3	4	seq_209246	FALSE	100048885	61516520	61782269	-	upstream	-16932	16932	NearestLocation	NA
chr4	62197025	62210239	13215	2	4	2	0	seq_209300	FALSE	22696	62189540	62208446	-	overlapStart	11421	1793	NearestLocation	Zfp37
chr4	68268286	68275649	7364	2	1	1	4	seq_210112	FALSE	102633975	68312657	68321961	-	downstream	53675	37008	NearestLocation	Gm12911
chr4	79301161	79307592	6432	3	1	2	3	seq_211464	FALSE	19266	75941238	78211961	-	upstream	-1089200	1089200	NearestLocation	Ptprd
chr4	84220365	84228673	8309	4	1	2	1	seq_212098	FALSE	78238	84042039	84044879	-	upstream	-175486	175486	NearestLocation	6030471H07Rik
chr4	85782933	85793785	10853	1	2	2	3	seq_212317	FALSE	77739	85514172	86428385	+	inside	268761	268761	NearestLocation	Adamtsl1
chr4	91221149	91231949	10801	3	3	4	0	seq_213022	FALSE	102466157	91373284	91373363	-	downstream	152214	141335	NearestLocation	Mir6402
chr4	94253488	94266774	13287	0	3	3	3	seq_213389	FALSE	67770	94500081	94556796	-	downstream	303308	233307	NearestLocation	Caap1
chr4	104951720	104963219	11500	2	2	2	2	seq_214766	FALSE	242594	104913456	105016863	+	inside	38264	38264	NearestLocation	Fyb2
chr4	106137902	106151046	13145	2	1	3	3	seq_214934	FALSE	105244641	106241216	106290026	+	upstream	-103314	90170	NearestLocation	Gm12724
chr4	107414101	107423337	9237	2	3	2	1	seq_215107	FALSE	230587	107434591	107635061	+	upstream	-20490	11254	NearestLocation	Glis1
chr4	107476906	107490923	14018	4	0	1	4	seq_215117	FALSE	230587	107434591	107635061	+	inside	42315	42315	NearestLocation	Glis1
chr4	109830725	109838579	7855	1	1	2	5	seq_215418	FALSE	242620	109978053	109983687	+	upstream	-147328	139474	NearestLocation	Dmrta2
chr4	112202321	112217193	14873	4	2	4	1	seq_215712	FALSE	195564	112232245	112300468	+	upstream	-29924	15052	NearestLocation	Skint3
chr4	114836582	114848591	12010	4	1	0	4	seq_216061	FALSE	433746	114821722	114856166	+	inside	14860	7575	NearestLocation	Gm12830
chr4	116714133	116727558	13426	2	1	3	2	seq_216322	FALSE	230661	116712723	116805956	+	inside	1410	1410	NearestLocation	Tesk2
chr4	117374138	117381952	7815	1	1	3	3	seq_216404	FALSE	66743	117271463	117497052	-	inside	122914	102675	NearestLocation	Rnf220
chr4	118546216	118554918	8703	3	4	5	6	seq_216553	TRUE	230678	118540941	118544044	-	upstream	-2172	2172	NearestLocation	Tmem125
chr4	123220205	123233618	13414	1	0	3	4	seq_217129	FALSE	56198	123233556	123249875	+	overlapStart	-13351	62	NearestLocation	Heyl
chr4	131749640	131760499	10860	3	2	4	5	seq_218269	FALSE	19273	131768457	131838288	-	downstream	88648	7958	NearestLocation	Ptpru
chr4	132167593	132176851	9259	2	2	1	3	seq_218327	FALSE	18386	132110726	132144486	-	upstream	-23107	23107	NearestLocation	Oprd1
chr4	133252120	133261642	9523	3	2	1	2	seq_218466	FALSE	269589	133253090	133263113	-	overlapEnd	10993	970	NearestLocation	Sytl1
chr4	135706582	135713508	6927	2	1	4	1	seq_218796	FALSE	230828	135728172	135752140	+	upstream	-21590	14664	NearestLocation	Il22ra1
chr4	136538435	136551420	12986	3	2	3	4	seq_218905	FALSE	99982	136550540	136602723	-	overlapEnd	64288	880	NearestLocation	Kdm1a
chr4	138414131	138425406	11276	0	2	4	2	seq_219146	FALSE	68350	138434671	138442265	+	upstream	-20540	9265	NearestLocation	Mul1
chr4	139677731	139688099	10369	5	1	0	2	seq_219331	FALSE	83770	139653538	139670280	+	downstream	24193	7451	NearestLocation	Tas1r2
chr4	141458249	141468461	10213	2	1	1	5	seq_219559	FALSE	22642	141444654	141467930	+	overlapEnd	13595	531	NearestLocation	Zbtb17
chr4	145665390	145681680	16291	3	3	0	7	seq_220146	TRUE	100041379	145670685	145704441	+	overlapStart	-5295	5295	NearestLocation	Zfp980
chr4	145683030	145692929	9900	0	3	1	8	seq_220147	TRUE	100041379	145670685	145704441	+	inside	12345	11512	NearestLocation	Zfp980
chr4	146160941	146176063	15123	8	4	5	4	seq_220188	TRUE	667666	146156824	146198755	+	inside	4117	4117	NearestLocation	Zfp600
chr4	146450970	146463875	12906	8	2	1	1	seq_220205	TRUE	433791	146449023	146470292	+	inside	1947	1947	NearestLocation	Zfp992
chr4	146474017	146503055	29039	16	11	18	17	seq_220208	TRUE	100041433	146502027	146539395	+	overlapStart	-28010	1028	NearestLocation	Zfp981
chr4	146722091	146740151	18061	5	2	4	9	seq_220226	TRUE	67524	146519039	146546873	-	upstream	-175218	175218	NearestLocation	1700095A21Rik
chr4	146965386	146976336	10951	4	0	3	1	seq_220236	TRUE	100043034	147021850	147060794	+	upstream	-56464	45514	NearestLocation	Rex2
chr4	147089581	147099281	9701	1	4	3	2	seq_220244	TRUE	71270	147063366	147068436	-	upstream	-21145	21145	NearestLocation	4933438K21Rik
chr4	147121594	147134515	12922	8	5	4	7	seq_220249	TRUE	71270	147063366	147068436	-	upstream	-53158	53158	NearestLocation	4933438K21Rik
chr4	147188549	147197642	9094	3	1	2	5	seq_220257	TRUE	71270	147063366	147068436	-	upstream	-120113	120113	NearestLocation	4933438K21Rik
chr4	147225702	147251610	25909	7	2	10	8	seq_220264	TRUE	71270	147063366	147068436	-	upstream	-157266	157266	NearestLocation	4933438K21Rik
chr4	147265358	147279221	13864	2	8	3	2	seq_220268	TRUE	71270	147063366	147068436	-	upstream	-196922	196922	NearestLocation	4933438K21Rik
chr4	147283146	147297671	14526	7	4	7	3	seq_220270	TRUE	195531	147492417	147513486	+	upstream	-209271	194746	NearestLocation	Zfp982
chr4	147334120	147355606	21487	6	7	11	13	seq_220276	TRUE	195531	147492417	147513486	+	upstream	-158297	136811	NearestLocation	Zfp982
chr4	147387192	147393924	6733	2	3	2	3	seq_220280	TRUE	195531	147492417	147513486	+	upstream	-105225	98493	NearestLocation	Zfp982
chr4	147394682	147405586	10905	5	5	9	6	seq_220281	TRUE	195531	147492417	147513486	+	upstream	-97735	86831	NearestLocation	Zfp982
chr4	147411950	147435370	23421	13	16	14	14	seq_220283	TRUE	195531	147492417	147513486	+	upstream	-80467	57047	NearestLocation	Zfp982
chr4	147435677	147448514	12838	6	3	3	2	seq_220284	TRUE	195531	147492417	147513486	+	upstream	-56740	43903	NearestLocation	Zfp982
chr4	147456267	147471434	15168	4	5	1	2	seq_220287	TRUE	195531	147492417	147513486	+	upstream	-36150	20983	NearestLocation	Zfp982
chr4	147496514	147504702	8189	3	1	3	1	seq_220293	TRUE	195531	147492417	147513486	+	inside	4097	4097	NearestLocation	Zfp982
chr4	147518141	147531153	13013	0	2	7	6	seq_220296	TRUE	433804	147553277	147585198	+	upstream	-35136	22124	NearestLocation	Zfp985
chr4	147555195	147564275	9081	5	2	3	3	seq_220299	TRUE	433804	147553277	147585198	+	inside	1918	1918	NearestLocation	Zfp985
chr4	147730965	147746176	15212	3	2	1	10	seq_220323	TRUE	100503584	147673502	147702553	-	upstream	-28412	28412	NearestLocation	Zfp534
chr4	147765120	147775897	10778	2	0	3	3	seq_220326	TRUE	100041677	147753974	147809840	-	inside	44720	11146	NearestLocation	Zfp984
chr4	147794228	147804600	10373	5	1	0	2	seq_220330	TRUE	100041677	147753974	147809840	-	inside	15612	5240	NearestLocation	Zfp984
chr4	148056988	148068022	11035	3	1	3	2	seq_220368	FALSE	17769	148039077	148059551	+	overlapEnd	17911	2563	NearestLocation	Mthfr
chr4	149811391	149822840	11450	2	1	2	6	seq_220599	TRUE	70556	149744036	149774277	-	upstream	-37114	37114	NearestLocation	Slc25a33
chr4	149928926	149938034	9109	2	1	1	4	seq_220611	FALSE	74646	149896283	149955043	-	inside	26117	17009	NearestLocation	Spsb1
chr4	150748195	150761728	13534	3	0	2	6	seq_220721	FALSE	74155	150853919	150868892	+	upstream	-105724	92191	NearestLocation	Errfi1
chr4	151114330	151126837	12508	2	0	4	3	seq_220774	FALSE	105704528	151089570	151091449	+	downstream	24760	22881	NearestLocation	Gm13090
chr4	151758278	151771101	12824	1	0	3	5	seq_220866	FALSE	100072	150917322	151861876	-	inside	103598	90775	NearestLocation	Camta1
chr4	151960929	151972238	11310	3	4	2	3	seq_220895	FALSE	69876	151982639	151988997	-	downstream	28068	10401	NearestLocation	Thap3
chr4	152572764	152579573	6810	3	2	2	1	seq_220991	FALSE	16498	152390742	152477910	-	upstream	-94854	94854	NearestLocation	Kcnab2
chr4	152837303	152845433	8131	3	0	2	3	seq_221029	FALSE	330004	152697540	152700515	+	downstream	139763	136788	NearestLocation	Gm833
chr4	153856381	153868339	11959	1	0	4	3	seq_221179	FALSE	407793	153947633	153950503	-	downstream	94122	79294	NearestLocation	BC039966
chr4	153902974	153913918	10945	1	3	2	2	seq_221184	FALSE	407793	153947633	153950503	-	downstream	47529	33715	NearestLocation	BC039966
chr4	154887248	154896735	9488	1	4	2	2	seq_221335	FALSE	66469	154895504	154899135	-	overlapEnd	11887	1231	NearestLocation	Prxl2b
chr4	155261281	155270024	8744	1	0	4	3	seq_221380	FALSE	67513	155249802	155256687	+	downstream	11479	4594	NearestLocation	Faap20
chr4	156339582	156344510	4929	0	4	3	1	seq_221519	TRUE	22300	156331135	156339496	+	downstream	8447	86	NearestLocation	Vmn2r123
chr4	156355804	156358614	2811	5	0	2	5	seq_221520	TRUE	22300	156331135	156339496	+	downstream	24669	16308	NearestLocation	Vmn2r123
chr5	5173711	5179794	6084	1	2	4	1	seq_221821	FALSE	18647	4803391	5420312	-	inside	246601	240518	NearestLocation	Cdk14
chr5	5314519	5326291	11773	1	4	2	1	seq_221839	FALSE	18647	4803391	5420312	-	inside	105793	94021	NearestLocation	Cdk14
chr5	10248478	10260315	11838	3	3	2	1	seq_222469	FALSE	108069	9485541	9725170	-	upstream	-523308	523308	NearestLocation	Grm3
chr5	14901781	14909545	7765	2	3	3	3	seq_222998	TRUE	381714	14910122	14914899	-	downstream	13118	577	NearestLocation	Gm9758
chr5	14909681	14922900	13220	5	6	8	3	seq_222999	TRUE	381714	14910122	14914899	-	includeFeature	5218	441	NearestLocation	Gm9758
chr5	14930472	14937212	6741	1	0	2	5	seq_223001	TRUE	624245	14933221	14938429	-	overlapEnd	7957	1217	NearestLocation	Speer4e
chr5	14937504	14947722	10219	6	2	5	6	seq_223002	TRUE	624245	14933221	14938429	-	overlapStart	925	925	NearestLocation	Speer4e
chr5	14951335	14965112	13778	11	6	5	11	seq_223004	TRUE	624245	14933221	14938429	-	upstream	-12906	12906	NearestLocation	Speer4e
chr5	14967059	14977280	10222	5	3	1	5	seq_223005	TRUE	100503549	14974113	14978935	-	overlapEnd	11876	1655	NearestLocation	Gm10354
chr5	14977837	14986499	8663	4	1	3	5	seq_223006	TRUE	100503549	14974113	14978935	-	overlapStart	1098	1098	NearestLocation	Gm10354
chr5	14986667	15047578	60912	28	35	27	33	seq_223007	TRUE	66773	15028950	15032998	-	includeFeature	46331	14580	NearestLocation	Gm17019
chr5	15050425	15063068	12644	7	4	7	7	seq_223008	TRUE	66773	15028950	15032998	-	upstream	-17427	17427	NearestLocation	Gm17019
chr5	15457434	15490469	33036	15	20	19	24	seq_223009	TRUE	100861755	15524456	15529222	-	downstream	71788	33987	NearestLocation	Gm21190
chr5	15502339	15524938	22600	7	7	11	10	seq_223012	TRUE	100861755	15524456	15529222	-	overlapEnd	26883	482	NearestLocation	Gm21190
chr5	15525151	15534996	9846	1	4	8	3	seq_223013	TRUE	100861755	15524456	15529222	-	overlapStart	4071	695	NearestLocation	Gm21190
chr5	15550138	15559373	9236	3	4	4	5	seq_223017	TRUE	105242399	15577333	15582078	+	upstream	-27195	17960	NearestLocation	Gm21083
chr5	15564760	15587167	22408	8	10	7	4	seq_223019	TRUE	105242399	15577333	15582078	+	includeFeature	-12573	5089	NearestLocation	Gm21083
chr5	15588729	15600681	11953	5	4	6	4	seq_223020	TRUE	105242399	15577333	15582078	+	downstream	11396	6651	NearestLocation	Gm21083
chr5	15604613	15610247	5635	1	3	2	4	seq_223022	TRUE	360220	15619064	15623864	+	upstream	-14451	8817	NearestLocation	Speer4d
chr5	15628054	15633572	5519	1	4	2	2	seq_223026	TRUE	360220	15619064	15623864	+	downstream	8990	4190	NearestLocation	Speer4d
chr5	15635886	15647338	11453	6	5	2	7	seq_223027	TRUE	381715	15652286	15657059	-	downstream	21173	4948	NearestLocation	4930572O03Rik
chr5	15649998	15656481	6484	5	3	1	0	seq_223028	TRUE	381715	15652286	15657059	-	overlapEnd	7061	578	NearestLocation	4930572O03Rik
chr5	15668249	15698658	30410	24	17	19	15	seq_223031	TRUE	75858	15680710	15714596	+	overlapStart	-12461	12461	NearestLocation	Speer4cos
chr5	15698959	15704822	5864	2	1	4	1	seq_223032	TRUE	100502967	15709501	15714271	-	downstream	15312	4679	NearestLocation	Speer4c
chr5	15704942	15716744	11803	10	5	10	5	seq_223033	TRUE	100502967	15709501	15714271	-	includeFeature	9329	2473	NearestLocation	Speer4c
chr5	21815863	21832740	16878	1	2	4	4	seq_223797	FALSE	19181	21785283	21803787	+	downstream	30580	12076	NearestLocation	Psmc2
chr5	21964873	21976687	11815	2	2	1	4	seq_223818	FALSE	80979	21810655	21865604	-	upstream	-99269	99269	NearestLocation	Slc26a5
chr5	22967752	22981966	14215	1	2	3	3	seq_223941	FALSE	330052	22738910	22746887	-	upstream	-220865	220865	NearestLocation	A930003O13Rik
chr5	25938387	25949714	11328	3	2	3	1	seq_224318	FALSE	100862359	25948253	25954417	-	overlapEnd	16030	1461	NearestLocation	Gm21671
chr5	26041500	26059367	17868	0	6	1	3	seq_224335	FALSE	75657	26032846	26039558	-	upstream	-1942	1942	NearestLocation	Speer4a
chr5	27074789	27084266	9478	0	1	3	4	seq_224479	FALSE	13483	26817203	27727505	+	inside	257586	257586	NearestLocation	Dpp6
chr5	29303436	29321085	17650	3	1	4	3	seq_224790	FALSE	56873	29229802	29378390	-	inside	74954	57305	NearestLocation	Lmbr1
chr5	29656066	29664114	8049	0	2	3	3	seq_224838	FALSE	23950	29735688	29818134	+	upstream	-79622	71574	NearestLocation	Dnajb6
chr5	29975042	29984943	9902	1	5	2	1	seq_224887	FALSE	16193	30013114	30019981	+	upstream	-38072	28171	NearestLocation	Il6
chr5	30120756	30128362	7607	1	3	0	4	seq_224909	FALSE	433868	30103584	30106086	-	upstream	-14670	14670	NearestLocation	3110082J24Rik
chr5	31403296	31411559	8264	3	1	2	2	seq_225085	FALSE	269639	31452431	31481754	+	upstream	-49135	40872	NearestLocation	Zfp512
chr5	31625759	31640979	15221	2	2	2	3	seq_225120	FALSE	102466677	31667231	31667340	-	downstream	41581	26252	NearestLocation	Mir3473e
chr5	32046194	32056115	9922	1	1	3	3	seq_225172	FALSE	14284	32135801	32157842	+	upstream	-89607	79686	NearestLocation	Fosl2
chr5	34642234	34650068	7835	3	1	1	3	seq_225504	FALSE	68294	34633642	34637212	-	upstream	-5022	5022	NearestLocation	Mfsd10
chr5	35879868	35890359	10492	3	0	5	0	seq_225680	FALSE	70292	35893319	36003923	+	upstream	-13451	2960	NearestLocation	Afap1
chr5	36629184	36631782	2599	4	2	1	1	seq_225789	TRUE	100855	36490604	36593276	-	upstream	-35908	35908	NearestLocation	Tbc1d14
chr5	37122774	37133232	10459	4	2	3	1	seq_225866	FALSE	381634	37085370	37229547	+	inside	37404	37404	NearestLocation	Gm1043
chr5	42719793	42730152	10360	1	1	3	3	seq_226606	FALSE	231207	43233170	43289724	+	upstream	-513377	503018	NearestLocation	Cpeb2
chr5	44877329	44885864	8536	1	2	2	3	seq_226897	FALSE	16826	44472132	44799680	-	upstream	-77649	77649	NearestLocation	Ldb2
chr5	46092990	46102764	9775	2	3	3	1	seq_227060	FALSE	78106	45926818	45932409	-	upstream	-160581	160581	NearestLocation	4930405L22Rik
chr5	50725433	50732723	7291	5	1	2	0	seq_227624	FALSE	102465903	50252762	50252868	+	downstream	472671	472565	NearestLocation	Mir8117
chr5	66484130	66494090	9961	5	1	2	1	seq_229601	FALSE	11787	66298703	66618784	-	inside	134654	124694	NearestLocation	Apbb2
chr5	66937670	66949230	11561	1	3	1	3	seq_229659	FALSE	18935	67094399	67099301	-	downstream	161631	145169	NearestLocation	Phox2b
chr5	67184295	67199156	14862	1	0	3	5	seq_229689	FALSE	67878	67260565	67291461	+	upstream	-76270	61409	NearestLocation	Tmem33
chr5	72898293	72909117	10825	1	3	1	4	seq_230394	FALSE	75991	72914304	72978829	+	upstream	-16011	5187	NearestLocation	Slain2
chr5	75345618	75356420	10803	5	0	0	4	seq_230704	FALSE	102465620	75176831	75176904	+	downstream	168787	168714	NearestLocation	Mir7025
chr5	75372238	75381202	8965	1	1	2	4	seq_230707	FALSE	16590	75574916	75656722	+	upstream	-202678	193714	NearestLocation	Kit
chr5	75690799	75697330	6532	3	2	1	2	seq_230751	FALSE	16590	75574916	75656722	+	downstream	115883	34077	NearestLocation	Kit
chr5	76957131	76967124	9994	3	0	2	3	seq_230920	FALSE	231327	76913249	76951578	-	upstream	-5553	5553	NearestLocation	Ppat
chr5	87221339	87229804	8466	1	2	2	3	seq_232135	FALSE	112417	87240493	87254804	-	downstream	33465	10689	NearestLocation	Ugt2b37
chr5	88057369	88065055	7687	0	1	4	3	seq_232233	FALSE	20600	88086556	88109053	+	upstream	-29187	21501	NearestLocation	Smr2
chr5	97791171	97799009	7839	1	1	4	2	seq_233384	FALSE	71914	97882783	98031043	-	downstream	239872	83774	NearestLocation	Antxr2
chr5	97836240	97850734	14495	2	1	6	3	seq_233387	FALSE	71914	97882783	98031043	-	downstream	194803	32049	NearestLocation	Antxr2
chr5	98103004	98111656	8653	1	2	3	2	seq_233424	FALSE	77630	98167198	98188991	+	upstream	-64194	55542	NearestLocation	Prdm8
chr5	102307443	102317555	10113	1	2	2	3	seq_233980	FALSE	231532	102481391	102897937	+	upstream	-173948	163836	NearestLocation	Arhgap24
chr5	102494435	102504207	9773	1	2	3	2	seq_234003	FALSE	231532	102481391	102897937	+	inside	13044	13044	NearestLocation	Arhgap24
chr5	105007220	105014591	7372	1	2	4	1	seq_234330	FALSE	27405	104935057	104982718	-	upstream	-24502	24502	NearestLocation	Abcg3
chr5	106320627	106332164	11538	4	0	1	3	seq_234499	FALSE	102635633	106321340	106323217	+	includeFeature	-713	713	NearestLocation	Gm32921
chr5	107612662	107622652	9991	4	0	2	3	seq_234671	FALSE	78443	107630250	107633850	-	downstream	21188	7598	NearestLocation	A930041C12Rik
chr5	107806381	107815821	9441	1	2	4	2	seq_234696	FALSE	73318	107830099	107831776	+	upstream	-23718	14278	NearestLocation	Ube2d2b
chr5	108603301	108616011	12711	2	1	3	3	seq_234799	FALSE	231580	108569411	108629755	-	inside	26454	13744	NearestLocation	Gak
chr5	111989357	112000189	10833	2	2	2	2	seq_235269	FALSE	75569	112206763	112210004	+	upstream	-217406	206574	NearestLocation	1700028D13Rik
chr5	114921448	114925792	4345	2	2	2	4	seq_235656	TRUE	231655	114923240	114937915	+	overlapStart	-1792	1792	NearestLocation	Oasl1
chr5	116085645	116093659	8015	3	1	1	3	seq_235827	FALSE	545798	116038755	116083244	-	upstream	-2401	2401	NearestLocation	Tmem233
chr5	116717259	116726101	8843	0	3	2	3	seq_235907	FALSE	68955	116439275	116591817	-	upstream	-125442	125442	NearestLocation	Srrm4
chr5	117104229	117115931	11703	0	5	3	0	seq_235960	FALSE	71954	117091680	117116113	-	inside	11884	182	NearestLocation	Suds3
chr5	117204553	117213683	9131	1	2	5	0	seq_235973	FALSE	23980	117282654	117287625	-	downstream	83072	68971	NearestLocation	Pebp1
chr5	118223882	118233596	9715	2	4	1	1	seq_236118	FALSE	269695	118190736	118245116	-	inside	21234	11520	NearestLocation	Rnft2
chr5	119884953	119896486	11534	1	3	1	3	seq_236344	FALSE	21388	119832668	119885219	+	overlapEnd	52285	266	NearestLocation	Tbx5
chr5	121133737	121147777	14041	3	1	4	3	seq_236512	FALSE	19247	121130533	121191397	-	inside	57660	3204	NearestLocation	Ptpn11
chr5	125911460	125917905	6446	2	3	2	1	seq_237143	FALSE	208151	125531774	125792583	+	downstream	379686	118877	NearestLocation	Tmem132b
chr5	128049551	128059140	9590	2	1	3	2	seq_237434	FALSE	243274	127781630	128433077	-	inside	383526	267921	NearestLocation	Tmem132d
chr5	128560007	128574677	14671	1	2	3	5	seq_237509	FALSE	319616	128579106	128600693	-	downstream	40686	4429	NearestLocation	Fzd10os
chr5	128708864	128726248	17385	2	4	2	4	seq_237525	FALSE	57749	128702524	128755474	+	inside	6340	6340	NearestLocation	Piwil1
chr5	128899087	128908636	9550	1	3	2	2	seq_237543	FALSE	231760	128757791	128953486	-	inside	54399	44850	NearestLocation	Rimbp2
chr5	129326392	129334699	8308	3	1	3	1	seq_237599	FALSE	231769	129501221	129571384	+	upstream	-174829	166522	NearestLocation	Sfswap
chr5	129957468	129967504	10037	1	3	1	3	seq_237678	FALSE	69568	129941970	129986692	+	inside	15498	15498	NearestLocation	Vkorc1l1
chr5	132721017	132730944	9928	3	4	1	1	seq_238081	FALSE	319974	131437333	132543344	-	upstream	-177673	177673	NearestLocation	Auts2
chr5	133234397	133246090	11694	1	3	3	1	seq_238155	FALSE	319974	131437333	132543344	-	upstream	-691053	691053	NearestLocation	Auts2
chr5	135397100	135411054	13955	2	2	1	4	seq_238462	FALSE	107939	135376141	135394546	-	upstream	-2554	2554	NearestLocation	Pom121
chr5	136977747	136985415	7669	1	2	2	4	seq_238668	FALSE	26433	136987019	136996648	+	upstream	-9272	1604	NearestLocation	Plod3
chr5	137147256	137154413	7158	0	0	5	5	seq_238686	TRUE	666339	137134922	137166070	-	inside	18814	11657	NearestLocation	Muc3
chr5	137291284	137303179	11896	2	0	4	2	seq_238699	FALSE	102466887	137293780	137293876	+	includeFeature	-2496	2496	NearestLocation	Mir8116
chr5	139743348	139751982	8635	3	2	1	2	seq_239022	FALSE	231830	139706696	139736336	-	upstream	-7012	7012	NearestLocation	Micall2
chr5	140028972	140043522	14551	2	3	1	7	seq_239060	FALSE	243312	139907943	139974722	+	downstream	121029	54250	NearestLocation	Elfn1
chr5	141733258	141741267	8010	2	2	2	3	seq_239300	FALSE	330222	141241490	142215586	+	inside	491768	474319	NearestLocation	Sdk1
chr5	142224196	142233665	9470	3	0	3	2	seq_239371	FALSE	17425	142401497	142462011	+	upstream	-177301	167832	NearestLocation	Foxk1
chr5	142433298	142442453	9156	1	3	3	3	seq_239394	FALSE	231855	142463944	142478710	+	upstream	-30646	21491	NearestLocation	Ap5z1
chr5	143455077	143468094	13018	1	2	4	2	seq_239540	FALSE	231871	143464584	143505942	+	overlapStart	-9507	3510	NearestLocation	Daglb
chr5	145663974	145672153	8180	2	2	2	3	seq_239826	FALSE	53973	145694049	145720136	-	downstream	56162	21896	NearestLocation	Cyp3a41a
chr5	145924379	145942911	18533	5	2	4	5	seq_239874	FALSE	13112	145854426	145879964	-	upstream	-44415	44415	NearestLocation	Cyp3a11
chr5	149145810	149157953	12144	2	4	0	6	seq_240284	FALSE	667410	149155439	149156209	-	includeFeature	10399	1744	NearestLocation	Gm8615
chr5	149577160	149593935	16776	4	0	1	6	seq_240349	FALSE	100415916	149489056	149538030	-	upstream	-39130	39130	NearestLocation	Gm15997
chr6	9040989	9054815	13827	1	0	6	2	seq_241408	FALSE	18231	8948431	9249032	+	inside	92558	92558	NearestLocation	Nxph1
chr6	17252305	17265831	13527	1	3	3	4	seq_242406	FALSE	12390	17281185	17289115	+	upstream	-28880	15354	NearestLocation	Cav2
chr6	18517348	18526483	9136	1	2	3	4	seq_242559	FALSE	30785	18366478	18514843	-	upstream	-2505	2505	NearestLocation	Cttnbp2
chr6	24733270	24745758	12489	3	2	0	3	seq_243290	FALSE	74409	24733245	24745452	+	overlapEnd	25	25	NearestLocation	Hyal6
chr6	28847163	28855306	8144	2	5	0	3	seq_243828	FALSE	192198	28828133	28831747	-	upstream	-15416	15416	NearestLocation	Lrrc4
chr6	29746162	29750701	4540	8	4	10	11	seq_243943	TRUE	319757	29735694	29761365	+	inside	10468	10468	NearestLocation	Smo
chr6	31584756	31597231	12476	4	0	1	4	seq_244174	TRUE	105242621	31574967	31576723	+	downstream	9789	8033	NearestLocation	Gm6117
chr6	34482653	34492035	9383	3	3	1	1	seq_244562	FALSE	12183	34476207	34505613	+	inside	6446	6446	NearestLocation	Bpgm
chr6	34879928	34889078	9151	5	1	2	2	seq_244610	FALSE	78412	34871771	34878060	-	upstream	-1868	1868	NearestLocation	Cyren
chr6	36843542	36852525	8984	1	0	6	1	seq_244873	FALSE	19242	36714929	36810220	-	upstream	-33322	33322	NearestLocation	Ptn
chr6	37197560	37211301	13742	1	2	5	3	seq_244919	FALSE	320127	36846022	37300184	-	inside	102624	88883	NearestLocation	Dgki
chr6	37503654	37514960	11307	2	2	1	3	seq_244961	FALSE	208665	37530173	37568815	+	upstream	-26519	15213	NearestLocation	Akr1d1
chr6	38764346	38774961	10616	0	1	3	4	seq_245115	FALSE	21391	38875404	39084585	+	upstream	-111058	100443	NearestLocation	Tbxas1
chr6	41229811	41242446	12636	2	1	3	2	seq_245433	FALSE	22074	41302269	41305532	+	upstream	-72458	59823	NearestLocation	Try4
chr6	53605407	53615182	9776	4	1	2	2	seq_247034	FALSE	66873	53815468	53820830	-	downstream	215423	200286	NearestLocation	Tril
chr6	54995001	55007944	12944	3	2	4	1	seq_247224	FALSE	110175	54982580	54992950	-	upstream	-2051	2051	NearestLocation	Ggct
chr6	56582691	56598671	15981	1	2	3	3	seq_247439	FALSE	18575	56069804	56652487	-	inside	69796	53816	NearestLocation	Pde1c
chr6	57773994	57783599	9606	4	1	0	3	seq_247601	FALSE	232023	57727807	57825159	-	inside	51165	41560	NearestLocation	Vopp1
chr6	68000662	68010737	10076	0	2	4	2	seq_248858	FALSE	75070	67565191	67566446	-	upstream	-434216	434216	NearestLocation	4930515G16Rik
chr6	70202712	70216638	13927	5	2	0	3	seq_249137	TRUE	19895	70765720	70792232	-	downstream	589520	549082	NearestLocation	Rpia
chr6	71374819	71383432	8614	3	0	2	3	seq_249301	FALSE	12525	71373427	71379173	+	overlapEnd	1392	1392	NearestLocation	Cd8a
chr6	71475326	71483430	8105	0	3	1	4	seq_249313	FALSE	22644	71493894	71510881	+	upstream	-18568	10464	NearestLocation	Rnf103
chr6	71728920	71736629	7710	2	2	3	1	seq_249343	FALSE	52250	71707561	71810710	+	inside	21359	21359	NearestLocation	Reep1
chr6	72646553	72653865	7313	4	1	3	0	seq_249476	FALSE	100038714	72629288	72637717	+	downstream	17265	8836	NearestLocation	Gm15401
chr6	72767668	72780282	12615	2	4	2	3	seq_249494	FALSE	21415	72626378	72789254	-	inside	21586	8972	NearestLocation	Tcf7l1
chr6	73260745	73276420	15676	1	3	1	4	seq_249559	FALSE	56451	73248382	73276911	+	inside	12363	491	NearestLocation	Suclg1
chr6	73896853	73906479	9627	1	2	3	3	seq_249635	FALSE	102634075	73586109	73608673	-	upstream	-288180	288180	NearestLocation	Gm31747
chr6	77000787	77012067	11281	2	2	2	4	seq_250007	FALSE	74342	77242689	77257791	+	upstream	-241902	230622	NearestLocation	Lrrtm1
chr6	77509184	77529560	20377	4	0	6	6	seq_250074	FALSE	70753	77380260	77382459	-	upstream	-126725	126725	NearestLocation	6330415B21Rik
chr6	77605413	77615763	10351	4	1	3	3	seq_250086	FALSE	70753	77380260	77382459	-	upstream	-222954	222954	NearestLocation	6330415B21Rik
chr6	84301151	84309709	8559	3	0	5	0	seq_250930	FALSE	100038556	84412942	84423838	-	downstream	122687	103233	NearestLocation	Gm10445
chr6	85822292	85830070	7779	3	2	0	4	seq_251135	FALSE	69049	85817218	85820972	-	upstream	-1320	1320	NearestLocation	Nat8f5
chr6	88949019	88962147	13129	4	3	4	3	seq_251562	FALSE	232217	88950683	89110031	+	overlapStart	-1664	1664	NearestLocation	4933427D06Rik
chr6	89135386	89145184	9799	4	2	2	0	seq_251589	FALSE	434065	89140994	89147388	+	overlapStart	-5608	2204	NearestLocation	Gm1965
chr6	89436522	89451860	15339	3	1	3	4	seq_251631	FALSE	18844	89316314	89362620	-	upstream	-73902	73902	NearestLocation	Plxna1
chr6	89475990	89490867	14878	1	3	5	4	seq_251634	FALSE	66098	89383146	89595652	-	inside	119662	92844	NearestLocation	Chchd6
chr6	89906444	89915940	9497	0	2	1	6	seq_251696	FALSE	113854	89893177	89894284	+	downstream	13267	12160	NearestLocation	Vmn1r44
chr6	90455218	90466620	11403	2	1	3	2	seq_251768	FALSE	66277	90462576	90475238	+	overlapStart	-7358	4044	NearestLocation	Klf15
chr6	90690824	90700677	9854	1	1	1	5	seq_251797	FALSE	71699	90604725	90646412	+	downstream	86099	44412	NearestLocation	Slc41a3
chr6	93256172	93265676	9505	1	1	3	3	seq_252173	FALSE	101401	92772699	92943492	-	upstream	-312680	312680	NearestLocation	Adamts9
chr6	95243063	95260117	17055	2	4	3	4	seq_252426	FALSE	414067	95255726	95333993	-	overlapEnd	90930	4391	NearestLocation	AY512915
chr6	96232190	96241443	9254	5	1	3	0	seq_252565	FALSE	78482	96164497	96166243	-	upstream	-65947	65947	NearestLocation	1700123L14Rik
chr6	98237736	98259669	21934	3	5	3	8	seq_252837	FALSE	330390	98235708	98342754	-	inside	105018	2028	NearestLocation	Gm765
chr6	98539764	98554466	14703	2	1	3	2	seq_252871	FALSE	330390	98235708	98342754	-	upstream	-197010	197010	NearestLocation	Gm765
chr6	99963650	99971591	7942	2	0	1	5	seq_253069	FALSE	50501	99711299	99726392	-	upstream	-237258	237258	NearestLocation	Prok2
chr6	100168174	100177248	9075	3	3	1	1	seq_253099	FALSE	56353	100228565	100287485	-	downstream	119311	51317	NearestLocation	Rybp
chr6	100983886	100994352	10467	3	3	1	1	seq_253216	FALSE	232314	100833622	100869934	+	downstream	150264	113952	NearestLocation	Ppp4r2
chr6	101027482	101040026	12545	3	3	1	3	seq_253222	FALSE	232314	100833622	100869934	+	downstream	193860	157548	NearestLocation	Ppp4r2
chr6	102481071	102490490	9420	1	6	1	2	seq_253414	TRUE	18488	102163304	102573101	-	inside	92030	82611	NearestLocation	Cntn3
chr6	103312843	103317412	4570	1	3	3	1	seq_253528	TRUE	12661	103510586	103750211	+	upstream	-197743	193174	NearestLocation	Chl1
chr6	103648040	103650294	2255	316	253	343	332	seq_253574	TRUE	12661	103510586	103750211	+	inside	137454	99917	NearestLocation	Chl1
chr6	109485974	109496017	10044	2	0	1	5	seq_254311	FALSE	192193	108828641	108859356	+	downstream	657333	626618	NearestLocation	Edem1
chr6	111577631	111586355	8725	1	3	3	2	seq_254577	FALSE	67336	112210708	112212519	+	upstream	-633077	624353	NearestLocation	1700054K19Rik
chr6	112574314	112584693	10380	2	2	4	0	seq_254718	FALSE	18430	112473683	112489943	-	upstream	-84371	84371	NearestLocation	Oxtr
chr6	114180233	114192438	12206	3	4	4	1	seq_254946	FALSE	243616	114131241	114249952	+	inside	48992	48992	NearestLocation	Slc6a11
chr6	114260065	114271689	11625	2	2	1	3	seq_254954	FALSE	232333	114282635	114317532	+	upstream	-22570	10946	NearestLocation	Slc6a1
chr6	118377764	118388106	10343	2	0	3	4	seq_255528	FALSE	213895	118383381	118419474	-	overlapEnd	41710	4725	NearestLocation	Bms1
chr6	118890867	118904196	13330	3	1	2	2	seq_255597	FALSE	319618	119175253	119221616	+	upstream	-284386	271057	NearestLocation	Dcp1b
chr6	119308050	119319617	11568	2	1	1	6	seq_255653	FALSE	211187	119315133	119330766	-	overlapEnd	22716	4484	NearestLocation	Lrtm2
chr6	125697420	125708629	11210	2	3	2	1	seq_256482	FALSE	243634	125690419	126040126	+	inside	7001	7001	NearestLocation	Ano2
chr6	125958631	125971436	12806	3	2	1	6	seq_256521	FALSE	18205	126101412	126166910	-	downstream	208279	129976	NearestLocation	Ntf3
chr6	126323108	126332265	9158	2	4	2	2	seq_256565	FALSE	100038574	126286649	126328686	-	overlapStart	5578	3579	NearestLocation	Gm10415
chr6	126574723	126585240	10518	0	0	5	3	seq_256600	FALSE	16493	126532551	126535412	-	upstream	-39311	39311	NearestLocation	Kcna5
chr6	127849265	127856386	7122	3	1	2	2	seq_256781	FALSE	68498	127887589	127953977	+	upstream	-38324	31203	NearestLocation	Tspan11
chr6	128240088	128250776	10689	1	1	1	5	seq_256834	FALSE	21679	128224288	128300823	-	inside	60735	15800	NearestLocation	Tead4
chr6	129915827	129927303	11477	1	3	2	2	seq_257044	FALSE	16636	129898996	129917650	-	overlapStart	1823	1823	NearestLocation	Klra5
chr6	132530882	132540604	9723	3	0	3	2	seq_257371	FALSE	19131	132569809	132572941	+	upstream	-38927	29205	NearestLocation	Prh1
chr6	134059871	134066576	6706	3	1	1	3	seq_257561	FALSE	14011	134035700	134270158	+	inside	24171	24171	NearestLocation	Etv6
chr6	136300705	136312075	11371	4	2	1	1	seq_257905	FALSE	668137	136327539	136329983	+	upstream	-26834	15464	NearestLocation	Eif4a3l1
chr6	137459916	137473299	13384	1	2	3	2	seq_258064	FALSE	13860	137477245	137654876	-	downstream	194960	3946	NearestLocation	Eps8
chr6	138076713	138088256	11544	2	2	4	1	seq_258153	FALSE	277898	137983586	138079916	-	overlapStart	3203	3203	NearestLocation	Slc15a5
chr6	140515598	140523862	8265	3	1	3	2	seq_258457	FALSE	109135	140424054	140597110	+	inside	91544	73248	NearestLocation	Plekha5
chr6	144350138	144362284	12147	2	0	4	2	seq_258960	FALSE	66760	144672868	144693834	+	upstream	-322730	310584	NearestLocation	Sox5os3
chr6	144674467	144682377	7911	1	1	4	2	seq_259009	FALSE	66760	144672868	144693834	+	inside	1599	1599	NearestLocation	Sox5os3
chr6	145136652	145147161	10510	4	0	3	1	seq_259064	FALSE	16970	145115653	145174934	+	inside	20999	20999	NearestLocation	Lrmp
chr6	145324650	145331509	6860	1	1	2	4	seq_259088	FALSE	381827	145391426	145392166	+	upstream	-66776	59917	NearestLocation	1700073E17Rik
chr6	146819320	146829912	10593	4	1	2	1	seq_259274	FALSE	69371	146850104	146871406	+	upstream	-30784	20192	NearestLocation	Smco2
chr6	148433500	148446785	13286	3	2	4	0	seq_259490	FALSE	387314	148232430	148444389	-	overlapStart	10889	2396	NearestLocation	Tmtc1
chr6	149397282	149405420	8139	0	2	4	2	seq_259616	FALSE	12121	149408984	149563329	+	upstream	-11702	3564	NearestLocation	Bicd1
chr7	8425598	8440882	15285	5	5	2	1	seq_260261	FALSE	434113	8366164	8383333	-	upstream	-42265	42265	NearestLocation	Vmn2r44
chr7	8451136	8461299	10164	3	2	1	2	seq_260264	FALSE	100042810	8469563	8489075	-	downstream	37939	8264	NearestLocation	Vmn2r45
chr7	12230245	12242341	12097	3	3	4	0	seq_260663	FALSE	100043092	12221316	12225807	+	downstream	8929	4438	NearestLocation	Gm4224
chr7	12328576	12341438	12863	4	2	3	0	seq_260675	FALSE	171243	12321180	12322175	-	upstream	-6401	6401	NearestLocation	Vmn1r83
chr7	14175452	14190249	14798	3	3	1	2	seq_260917	FALSE	629203	14067446	14123044	-	upstream	-52408	52408	NearestLocation	Sult2a3
chr7	15314144	15324738	10595	0	2	5	5	seq_261075	TRUE	246792	15388721	15398545	+	upstream	-74577	63983	NearestLocation	Obox2
chr7	15394567	15408393	13827	0	1	5	7	seq_261087	TRUE	71468	15388948	15556866	+	inside	5619	5619	NearestLocation	Obox1
chr7	15409426	15417605	8180	0	4	3	2	seq_261088	TRUE	71468	15388948	15556866	+	inside	20478	20478	NearestLocation	Obox1
chr7	16120954	16130991	10038	2	2	2	3	seq_261181	FALSE	110891	16129826	16161063	+	overlapStart	-8872	1165	NearestLocation	Slc8a2
chr7	17716180	17728547	12368	1	1	4	3	seq_261384	FALSE	73250	17713238	17761132	+	inside	2942	2942	NearestLocation	Ceacam5
chr7	17896696	17906051	9356	3	1	2	2	seq_261410	FALSE	66996	17972124	17978556	+	upstream	-75428	66073	NearestLocation	Ceacam11
chr7	18097857	18109522	11666	4	4	0	2	seq_261439	FALSE	67315	18065929	18077986	+	downstream	31928	19871	NearestLocation	Ceacam12
chr7	18237780	18250500	12721	3	1	3	3	seq_261455	FALSE	266815	18245347	18266092	+	overlapStart	-7567	5153	NearestLocation	Mill1
chr7	18527953	18540588	12636	3	3	2	3	seq_261502	FALSE	114868	18519702	18532269	-	overlapStart	4316	4316	NearestLocation	Psg25
chr7	19968324	19979054	10731	3	3	2	2	seq_261694	FALSE	71601	19965412	19991104	+	inside	2912	2912	NearestLocation	Ceacam20
chr7	22764036	22771228	7193	3	0	4	1	seq_261841	TRUE	667551	22761697	22762590	+	downstream	2339	1446	NearestLocation	Vmn1r157
chr7	22796165	22809759	13595	3	3	1	3	seq_261846	TRUE	100043067	22789859	22790782	-	upstream	-5383	5383	NearestLocation	Vmn1r158
chr7	24340968	24349022	8055	4	2	2	0	seq_262018	FALSE	76942	24349196	24355109	+	upstream	-8228	174	NearestLocation	Lypd5
chr7	24491165	24499917	8753	4	1	1	2	seq_262035	FALSE	232969	24507006	24515682	+	upstream	-15841	7089	NearestLocation	Zfp428
chr7	24937534	24947398	9865	2	2	3	1	seq_262091	FALSE	232974	24927445	24944494	-	overlapStart	6960	2904	NearestLocation	Gm4881
chr7	25764756	25773857	9102	1	3	1	3	seq_262205	FALSE	232989	25721165	25754757	-	upstream	-9999	9999	NearestLocation	Hnrnpul1
chr7	25881900	25891489	9590	0	0	5	4	seq_262218	FALSE	13088	25897620	25926624	+	upstream	-15720	6131	NearestLocation	Cyp2b10
chr7	26051650	26062791	11142	3	1	4	1	seq_262240	TRUE	13089	26061497	26096197	+	overlapStart	-9847	1294	NearestLocation	Cyp2b13
chr7	26346158	26358747	12590	1	3	3	2	seq_262288	FALSE	13086	26307169	26315088	+	downstream	38989	31070	NearestLocation	Cyp2a4
chr7	26748436	26755950	7515	1	2	3	2	seq_262338	FALSE	13090	26757142	26772630	+	upstream	-8706	1192	NearestLocation	Cyp2b19
chr7	27261802	27273033	11232	3	1	1	3	seq_262410	FALSE	18223	27258433	27282144	+	inside	3369	3369	NearestLocation	Numbl
chr7	28401314	28411592	10279	1	1	3	5	seq_262559	FALSE	54624	28392951	28399388	+	downstream	8363	1926	NearestLocation	Paf1
chr7	30417408	30426309	8902	2	2	0	4	seq_262803	FALSE	23900	30417712	30419854	-	includeFeature	2446	304	NearestLocation	Hcst
chr7	31371225	31380680	9456	2	5	0	2	seq_262936	TRUE	384585	31375592	31376916	+	includeFeature	-4367	3764	NearestLocation	Scgb1b3
chr7	31460305	31469550	9246	2	2	1	3	seq_262951	FALSE	384585	31375592	31376916	+	downstream	84713	83389	NearestLocation	Scgb1b3
chr7	31960664	31969087	8424	3	0	4	1	seq_263016	TRUE	100043842	32209173	32211145	-	downstream	250481	240086	NearestLocation	Scgb2b11
chr7	32082904	32091873	8970	3	2	0	3	seq_263031	FALSE	100043842	32209173	32211145	-	downstream	128241	117300	NearestLocation	Scgb2b11
chr7	33816214	33826130	9917	3	1	3	2	seq_263200	FALSE	100043860	33743799	33744982	+	downstream	72415	71232	NearestLocation	Scgb1b24
chr7	33842412	33854402	11991	3	4	0	2	seq_263203	FALSE	110187	33943002	33945040	-	downstream	102628	88600	NearestLocation	Scgb2b26
chr7	34048571	34056566	7996	3	2	2	3	seq_263226	FALSE	11354	34021483	34022881	+	downstream	27088	25690	NearestLocation	Scgb1b27
chr7	34816050	34825571	9522	4	0	3	3	seq_263329	FALSE	68947	34674468	34812711	-	upstream	-3339	3339	NearestLocation	Chst8
chr7	35423601	35436936	13336	2	2	5	1	seq_263411	FALSE	30962	35448796	35466036	+	upstream	-25195	11860	NearestLocation	Slc7a9
chr7	39134104	39146716	12613	2	3	2	2	seq_263886	TRUE	330513	39407294	39413160	-	downstream	279056	260578	NearestLocation	Gm5114
chr7	40069904	40076762	6859	3	2	3	0	seq_263983	FALSE	70227	39517766	39540420	+	downstream	552138	529484	NearestLocation	Zfp619
chr7	40127118	40141895	14778	2	1	5	6	seq_263990	FALSE	71029	40674737	40691273	+	upstream	-547619	532842	NearestLocation	4933402C06Rik
chr7	40183848	40197668	13821	1	2	4	2	seq_263999	FALSE	71029	40674737	40691273	+	upstream	-490889	477069	NearestLocation	4933402C06Rik
chr7	43129988	43144812	14825	6	2	1	2	seq_264386	TRUE	668620	43114229	43192109	+	inside	15759	15759	NearestLocation	Zfp936
chr7	43185346	43200110	14765	4	5	4	1	seq_264392	TRUE	100170401	43214039	43226842	+	upstream	-28693	13929	NearestLocation	EU599041
chr7	43726159	43737325	11167	3	2	2	1	seq_264466	FALSE	626834	43712567	43727534	+	overlapEnd	13592	1375	NearestLocation	Klk13
chr7	45304737	45320073	15337	1	2	3	3	seq_264667	FALSE	100040970	45324965	45325617	+	upstream	-20228	4892	NearestLocation	Rpl14-ps1
chr7	45877565	45885467	7903	2	2	4	0	seq_264737	FALSE	68137	45872772	45883732	+	overlapEnd	4793	1735	NearestLocation	Kdelr1
chr7	46369872	46382316	12445	0	3	3	3	seq_264815	FALSE	17927	46376474	46379099	+	includeFeature	-6602	3217	NearestLocation	Myod1
chr7	47231656	47246526	14871	3	1	3	3	seq_264922	FALSE	668725	47234861	47252848	-	overlapEnd	21192	3205	NearestLocation	Mrgpra9
chr7	47284318	47300122	15805	5	1	0	3	seq_264929	FALSE	668725	47234861	47252848	-	upstream	-31470	31470	NearestLocation	Mrgpra9
chr7	47542787	47553772	10986	2	3	3	1	seq_264970	FALSE	235712	47463806	47528862	-	upstream	-13925	13925	NearestLocation	Mrgpra2b
chr7	47863217	47871670	8454	1	1	1	5	seq_265014	FALSE	235854	47980837	47982095	-	downstream	118878	109167	NearestLocation	Mrgpra4
chr7	48563550	48581422	17873	4	1	6	2	seq_265101	FALSE	243979	48550965	48558086	-	upstream	-5464	5464	NearestLocation	Mrgprb2
chr7	49188200	49198095	9896	5	0	3	2	seq_265182	FALSE	108167511	49122334	49159819	-	upstream	-28381	28381	NearestLocation	9130015G15Rik
chr7	52446317	52463631	17315	3	1	3	6	seq_265604	FALSE	100503036	52011683	52015728	-	upstream	-430589	430589	NearestLocation	1700015G11Rik
chr7	58131633	58138341	6709	0	3	2	3	seq_266322	FALSE	11982	58658246	58829420	+	upstream	-526613	519905	NearestLocation	Atp10a
chr7	59085170	59097806	12637	1	0	3	5	seq_266445	FALSE	22215	59228750	59311536	+	upstream	-143580	130944	NearestLocation	Ube3a
chr7	59758758	59775842	17085	11	10	7	8	seq_266533	TRUE	64243	59751489	59751582	-	upstream	-7176	7176	NearestLocation	Gm26504
chr7	63219620	63226238	6619	0	3	2	3	seq_266936	FALSE	11441	63098692	63212569	-	upstream	-7051	7051	NearestLocation	Chrna7
chr7	64077835	64090797	12963	7	7	3	4	seq_267058	TRUE	17364	64153835	64269775	+	upstream	-76000	63038	NearestLocation	Trpm1
chr7	64302938	64312726	9789	3	0	4	2	seq_267087	FALSE	233315	64287653	64340806	+	inside	15285	15285	NearestLocation	Mtmr10
chr7	64466778	64478413	11636	4	4	2	2	seq_267111	TRUE	11784	64501706	64753878	+	upstream	-34928	23293	NearestLocation	Apba2
chr7	64761427	64772333	10907	2	2	0	4	seq_267146	FALSE	66647	64867052	64872997	-	downstream	111570	94719	NearestLocation	Nsmce3
chr7	65181886	65190790	8905	4	2	2	1	seq_267201	TRUE	70638	64756091	65156570	-	upstream	-25316	25316	NearestLocation	Fam189a1
chr7	66772315	66785990	13676	1	2	1	6	seq_267416	FALSE	545975	66743504	66823691	+	inside	28811	28811	NearestLocation	Cers3
chr7	68212342	68225252	12911	2	2	2	2	seq_267609	FALSE	78444	68236610	68264233	-	downstream	51891	11358	NearestLocation	Pgpep1l
chr7	73437129	73449435	12307	2	2	3	3	seq_268305	FALSE	319783	73314003	73375774	-	upstream	-61355	61355	NearestLocation	A730056A06Rik
chr7	73457096	73466954	9859	2	1	1	4	seq_268308	FALSE	244059	73426638	73541746	-	inside	84650	30458	NearestLocation	Chd2
chr7	74350843	74361481	10639	2	3	3	2	seq_268433	FALSE	108116	74275419	74554780	-	inside	203937	75424	NearestLocation	Slco3a1
chr7	75023797	75031253	7457	1	2	1	4	seq_268530	FALSE	75205	75030194	75075164	+	overlapStart	-6397	1059	NearestLocation	4930533N22Rik
chr7	75213204	75223701	10498	3	1	1	3	seq_268556	FALSE	68954	75308696	75331419	+	upstream	-95492	84995	NearestLocation	1500012K07Rik
chr7	75626713	75638926	12214	1	0	4	3	seq_268611	FALSE	75547	75455534	75754609	+	inside	171179	115683	NearestLocation	Akap13
chr7	77926199	77937304	11106	1	4	3	2	seq_268927	FALSE	18213	78175959	78578408	-	downstream	652209	238655	NearestLocation	Ntrk3
chr7	79444396	79456822	12427	2	1	1	4	seq_269125	FALSE	18975	79446231	79466362	-	overlapEnd	21966	1835	NearestLocation	Polg
chr7	80233006	80243625	10620	2	3	2	1	seq_269222	FALSE	269952	80232865	80242061	+	overlapEnd	141	141	NearestLocation	Gdpgp1
chr7	80564967	80572917	7951	2	1	3	2	seq_269261	FALSE	12144	80454733	80535119	-	upstream	-29848	29848	NearestLocation	Blm
chr7	93072380	93084800	12421	1	3	1	3	seq_270846	FALSE	100040298	93178983	93184176	-	downstream	111796	94183	NearestLocation	Gm15501
chr7	93936963	93948090	11128	2	2	2	2	seq_270952	FALSE	100040298	93178983	93184176	-	upstream	-752787	752787	NearestLocation	Gm15501
chr7	97778626	97787493	8868	2	2	2	2	seq_271442	FALSE	18479	97788541	97912381	+	upstream	-9915	1048	NearestLocation	Pak1
chr7	98085992	98094012	8021	3	1	2	2	seq_271481	FALSE	17921	98051060	98119524	-	inside	33532	25512	NearestLocation	Myo7a
chr7	103388869	103399118	10250	1	1	3	4	seq_272187	FALSE	259073	103383062	103384000	-	upstream	-4869	4869	NearestLocation	Olfr603
chr7	106476501	106485542	9042	3	3	0	2	seq_272550	FALSE	668128	106323414	106330688	-	upstream	-145813	145813	NearestLocation	Gm8989
chr7	112685356	112697039	11684	4	0	0	4	seq_273399	FALSE	21676	112679318	112906807	+	inside	6038	6038	NearestLocation	Tead1
chr7	115920286	115928915	8630	1	2	3	2	seq_273840	FALSE	68469	116031979	116032550	+	upstream	-111693	103064	NearestLocation	Sox6os
chr7	115942303	115955509	13207	3	3	2	2	seq_273843	FALSE	68469	116031979	116032550	+	upstream	-89676	76470	NearestLocation	Sox6os
chr7	117028519	117035513	6995	3	2	2	1	seq_273986	FALSE	233781	117380979	117673580	+	upstream	-352460	345466	NearestLocation	Xylt1
chr7	117259138	117266678	7541	0	1	2	5	seq_274019	FALSE	233781	117380979	117673580	+	upstream	-121841	114301	NearestLocation	Xylt1
chr7	118783473	118795340	11868	2	1	1	5	seq_274234	FALSE	71517	118740226	118842966	+	inside	43247	43247	NearestLocation	Vps35l
chr7	119399067	119409468	10402	2	2	1	3	seq_274316	FALSE	67133	119442537	119459285	-	downstream	60218	33069	NearestLocation	Gp2
chr7	119449901	119457240	7340	2	3	1	2	seq_274322	FALSE	67133	119442537	119459285	-	inside	9384	2045	NearestLocation	Gp2
chr7	119893388	119903025	9638	2	3	2	2	seq_274392	FALSE	73919	119895861	119956963	+	overlapStart	-2473	2473	NearestLocation	Lyrm1
chr7	120465515	120479251	13737	0	3	2	4	seq_274467	FALSE	233810	120409647	120544813	+	inside	55868	55868	NearestLocation	Abca16
chr7	121500585	121508314	7730	1	1	3	3	seq_274602	FALSE	69407	121589903	121591591	+	upstream	-89318	81589	NearestLocation	1700025J12Rik
chr7	122083780	122096936	13157	0	2	3	5	seq_274683	FALSE	70316	122085403	122101886	-	overlapEnd	18106	1623	NearestLocation	Ndufab1
chr7	122593383	122607500	14118	0	5	2	5	seq_274751	FALSE	54376	122670492	122769393	+	upstream	-77109	62992	NearestLocation	Cacng3
chr7	122794191	122806096	11906	3	3	2	0	seq_274776	FALSE	54376	122670492	122769393	+	downstream	123699	24798	NearestLocation	Cacng3
chr7	123338691	123347428	8738	3	1	4	0	seq_274851	FALSE	30949	123369784	123430358	+	upstream	-31093	22356	NearestLocation	Lcmt1
chr7	123370359	123380715	10357	2	0	3	3	seq_274855	FALSE	70497	123279218	123369915	-	upstream	-444	444	NearestLocation	Arhgap17
chr7	123827231	123835462	8232	3	2	2	1	seq_274910	FALSE	628779	123982869	124398989	+	upstream	-155638	147407	NearestLocation	Hs3st4
chr7	123982984	123993993	11010	0	0	5	3	seq_274933	FALSE	628779	123982869	124398989	+	inside	115	115	NearestLocation	Hs3st4
chr7	124485509	124495983	10475	2	3	3	1	seq_275002	FALSE	73076	124625670	124708935	-	downstream	223426	129687	NearestLocation	3100003L05Rik
chr7	124868101	124884089	15989	3	3	4	2	seq_275059	FALSE	73076	124625670	124708935	-	upstream	-159166	159166	NearestLocation	3100003L05Rik
chr7	124971824	124984451	12628	2	4	1	1	seq_275071	FALSE	73076	124625670	124708935	-	upstream	-262889	262889	NearestLocation	3100003L05Rik
chr7	125183276	125191136	7861	1	1	4	2	seq_275101	FALSE	71208	125284025	125349788	-	downstream	166512	92889	NearestLocation	4933440M02Rik
chr7	125617490	125631341	13852	4	3	1	0	seq_275160	FALSE	60504	125603429	125633570	+	inside	14061	2229	NearestLocation	Il21r
chr7	125723943	125733588	9646	1	1	1	5	seq_275173	FALSE	233865	125707888	125874793	+	inside	16055	16055	NearestLocation	D430042O09Rik
chr7	125734187	125745101	10915	1	0	4	3	seq_275174	FALSE	233865	125707888	125874793	+	inside	26299	26299	NearestLocation	D430042O09Rik
chr7	127308521	127318763	10243	3	0	5	1	seq_275377	FALSE	16408	127296260	127335138	+	inside	12261	12261	NearestLocation	Itgal
chr7	127484733	127495845	11113	3	0	4	2	seq_275397	FALSE	102465642	127489251	127489387	+	includeFeature	-4518	4518	NearestLocation	Mir7060
chr7	127544607	127553291	8685	1	2	1	4	seq_275402	FALSE	105180375	127560085	127566940	+	upstream	-15478	6794	NearestLocation	Tmem265
chr7	127785182	127793554	8373	3	1	1	3	seq_275423	FALSE	101502	127799391	127803802	+	upstream	-14209	5837	NearestLocation	Hsd3b7
chr7	129071747	129083339	11593	2	0	1	5	seq_275590	FALSE	381925	129257031	129391412	+	upstream	-185284	173692	NearestLocation	Plpp4
chr7	130623543	130636635	13093	1	4	2	2	seq_275794	FALSE	57752	130577438	130764785	+	inside	46105	46105	NearestLocation	Tacc2
chr7	131458967	131465902	6936	1	1	6	1	seq_275901	FALSE	66885	131410601	131448944	+	downstream	48366	10023	NearestLocation	Acadsb
chr7	133801726	133808747	7022	2	2	3	2	seq_276232	FALSE	101437	133720942	133782726	-	upstream	-19000	19000	NearestLocation	Dhx32
chr7	133837520	133849678	12159	5	0	3	1	seq_276239	FALSE	101437	133720942	133782726	-	upstream	-54794	54794	NearestLocation	Dhx32
chr7	135451935	135462947	11013	2	3	3	2	seq_276476	FALSE	270004	135410308	135413622	+	downstream	41627	38313	NearestLocation	Foxi2
chr7	136515158	136529451	14294	1	5	3	4	seq_276626	FALSE	330664	136332216	136349415	-	upstream	-165743	165743	NearestLocation	C230079O03Rik
chr7	137083372	137097315	13944	3	0	2	6	seq_276703	FALSE	100038555	137234683	137242609	+	upstream	-151311	137368	NearestLocation	Gm10578
chr7	138006791	138017422	10632	2	3	0	3	seq_276839	FALSE	70571	138208974	138397730	-	downstream	390939	191552	NearestLocation	Tcerg1l
chr7	138377236	138388511	11276	2	0	2	5	seq_276892	FALSE	70571	138208974	138397730	-	inside	20494	9219	NearestLocation	Tcerg1l
chr7	138398610	138408567	9958	4	1	1	2	seq_276894	FALSE	70571	138208974	138397730	-	upstream	-880	880	NearestLocation	Tcerg1l
chr7	138900130	138913445	13316	4	0	4	1	seq_276963	FALSE	12176	138890836	138909519	-	overlapStart	9389	3926	NearestLocation	Bnip3
chr7	139169525	139177689	8165	4	1	1	2	seq_276992	FALSE	76612	139212988	139242979	+	upstream	-43463	35299	NearestLocation	Lrrc27
chr7	140594707	140607334	12628	1	3	1	3	seq_277209	FALSE	18345	140601269	140617678	+	overlapStart	-6562	6065	NearestLocation	Olfr46
chr7	141606191	141616370	10180	4	2	1	1	seq_277335	FALSE	100036523	141610066	141613747	-	includeFeature	7556	2623	NearestLocation	Gm16982
chr7	142738045	142745469	7425	3	1	4	0	seq_277488	FALSE	16334	142678656	142743381	-	overlapStart	5336	2088	NearestLocation	Ins2
chr7	142789171	142798244	9074	4	0	1	3	seq_277494	FALSE	16334	142678656	142743381	-	upstream	-45790	45790	NearestLocation	Ins2
chr7	144006732	144018119	11388	2	2	1	4	seq_277662	FALSE	100526562	144009254	144009338	+	includeFeature	-2522	2522	NearestLocation	Mir3105
chr7	144081958	144094867	12910	4	2	2	5	seq_277671	FALSE	100526562	144009254	144009338	+	downstream	72704	72620	NearestLocation	Mir3105
chr8	3358294	3371181	12888	3	2	2	1	seq_277917	FALSE	102098	3353415	3456601	+	inside	4879	4879	NearestLocation	Arhgef18
chr8	3439254	3450170	10917	3	2	2	2	seq_277930	FALSE	69129	3457105	3467680	-	downstream	28426	6935	NearestLocation	Pex11g
chr8	3490629	3508875	18247	3	3	4	3	seq_277937	FALSE	140482	3493138	3497208	+	includeFeature	-2509	2509	NearestLocation	Zfp358
chr8	3976403	3990189	13787	4	3	2	0	seq_278007	FALSE	170776	3940222	3954746	-	upstream	-21657	21657	NearestLocation	Cd209c
chr8	6034563	6043635	9073	4	0	0	4	seq_278258	FALSE	20494	5083219	5105351	-	upstream	-929212	929212	NearestLocation	Slc10a2
chr8	10465269	10477691	12423	2	1	3	4	seq_278855	FALSE	244281	10153911	10634742	+	inside	311358	157051	NearestLocation	Myo16
chr8	10685220	10696149	10930	6	1	1	1	seq_278889	FALSE	320014	10870422	10882454	-	downstream	197234	174273	NearestLocation	B930025P03Rik
chr8	12817365	12833075	15711	2	2	5	1	seq_279197	FALSE	100504249	12828335	12833865	-	overlapEnd	16500	790	NearestLocation	Gm15350
chr8	13432740	13445097	12358	2	2	5	1	seq_279275	FALSE	272465	13435189	13468473	+	overlapStart	-2449	2449	NearestLocation	Tmem255b
chr8	14736358	14744474	8117	4	1	2	1	seq_279448	FALSE	26889	14881335	14901720	+	upstream	-144977	136861	NearestLocation	Cln8
chr8	15366778	15380316	13539	5	1	1	2	seq_279533	FALSE	17930	15057653	15133541	+	downstream	309125	233237	NearestLocation	Myom2
chr8	15699984	15714089	14106	3	2	3	2	seq_279580	FALSE	100526464	16168757	16168838	-	downstream	468854	454668	NearestLocation	Mir3106
chr8	19699061	19706820	7760	2	3	2	4	seq_280115	TRUE	626415	19729576	19753527	+	upstream	-30515	22756	NearestLocation	4930467E23Rik
chr8	19905391	19913853	8463	1	2	5	3	seq_280134	TRUE	626415	19729576	19753527	+	downstream	175815	151864	NearestLocation	4930467E23Rik
chr8	20359726	20372131	12406	1	2	2	5	seq_280182	TRUE	100040599	20337664	20363210	-	overlapStart	3484	3484	NearestLocation	Gm15319
chr8	20374116	20382294	8179	2	1	6	2	seq_280183	TRUE	100040599	20337664	20363210	-	upstream	-10906	10906	NearestLocation	Gm15319
chr8	20508853	20538028	29176	8	3	13	2	seq_280196	TRUE	100861668	20614919	20640703	+	upstream	-106066	76891	NearestLocation	Gm21119
chr8	20538808	20550556	11749	5	2	5	4	seq_280197	TRUE	100861668	20614919	20640703	+	upstream	-76111	64363	NearestLocation	Gm21119
chr8	20592771	20601772	9002	2	2	2	5	seq_280203	TRUE	100861668	20614919	20640703	+	upstream	-22148	13147	NearestLocation	Gm21119
chr8	20676170	20687599	11430	2	2	3	3	seq_280213	TRUE	100861668	20614919	20640703	+	downstream	61251	35467	NearestLocation	Gm21119
chr8	20811547	20820295	8749	2	1	6	5	seq_280219	TRUE	654453	20892669	20897723	+	upstream	-81122	72374	NearestLocation	Defb33
chr8	20887008	20900436	13429	1	4	4	2	seq_280229	FALSE	654453	20892669	20897723	+	includeFeature	-5661	2713	NearestLocation	Defb33
chr8	22848083	22857423	9341	3	1	2	2	seq_280480	FALSE	244349	22859535	22943259	+	upstream	-11452	2112	NearestLocation	Kat6a
chr8	23038476	23048167	9692	2	1	5	2	seq_280505	FALSE	11733	22974844	23150497	+	inside	63632	63632	NearestLocation	Ank1
chr8	23924268	23938674	14407	1	4	6	3	seq_280622	FALSE	320158	23636019	24156585	+	inside	288249	217911	NearestLocation	Zmat4
chr8	24066665	24079771	13107	4	2	1	2	seq_280639	FALSE	69068	24437180	24438984	-	downstream	372319	357409	NearestLocation	Tcim
chr8	26152353	26163835	11483	5	0	2	2	seq_280915	FALSE	73754	26158141	26164151	+	overlapStart	-5788	316	NearestLocation	Thap1
chr8	27377751	27386856	9106	4	2	1	1	seq_281076	FALSE	108043	27368711	27399730	+	inside	9040	9040	NearestLocation	Chrnb3
chr8	28030982	28039378	8397	0	0	5	4	seq_281161	FALSE	666422	28082694	28084920	-	downstream	53938	43316	NearestLocation	Gm8096
chr8	28749280	28761895	12616	4	1	1	2	seq_281261	FALSE	210801	28646717	29219636	-	inside	470356	102563	NearestLocation	Unc5d
chr8	29265244	29274029	8786	5	0	2	1	seq_281327	FALSE	210801	28646717	29219636	-	upstream	-45608	45608	NearestLocation	Unc5d
chr8	30461192	30469902	8711	0	2	3	3	seq_281471	FALSE	71314	30568393	30575573	+	upstream	-107201	98491	NearestLocation	4933433F19Rik
chr8	30816425	30825881	9457	2	1	5	1	seq_281520	FALSE	71314	30568393	30575573	+	downstream	248032	240852	NearestLocation	4933433F19Rik
chr8	32136497	32145198	8702	0	4	5	0	seq_281712	FALSE	211323	31814551	32884797	-	inside	748300	321946	NearestLocation	Nrg1
chr8	45439645	45454328	14684	0	1	6	2	seq_283376	FALSE	142980	45395665	45411080	-	upstream	-28565	28565	NearestLocation	Tlr3
chr8	46084842	46094767	9926	2	3	2	2	seq_283458	FALSE	66756	46151771	46195590	+	upstream	-66929	57004	NearestLocation	Cfap97
chr8	46819769	46834786	15018	3	3	5	2	seq_283564	FALSE	16363	46739732	46847458	+	inside	80037	12672	NearestLocation	Irf2
chr8	55345049	55352040	6992	3	1	4	1	seq_284565	TRUE	234267	54954843	55060871	+	downstream	390206	284178	NearestLocation	Gpm6a
chr8	55393123	55403079	9957	2	4	4	1	seq_284570	TRUE	234267	54954843	55060871	+	downstream	438280	332252	NearestLocation	Gpm6a
chr8	56468432	56476746	8315	0	4	1	3	seq_284698	FALSE	75123	56465622	56484968	-	inside	16536	2810	NearestLocation	4930518J21Rik
chr8	64411415	64420018	8604	1	0	3	4	seq_285639	FALSE	735270	64514332	64514441	-	downstream	103026	94314	NearestLocation	Mir710
chr8	66247315	66253193	5879	2	3	2	1	seq_285878	FALSE	66282	66473118	66486530	-	downstream	239215	219925	NearestLocation	Tma16
chr8	71172711	71181579	8869	3	1	2	2	seq_286545	FALSE	69419	70948246	71085758	-	upstream	-86953	86953	NearestLocation	1700026F02Rik
chr8	71814649	71828281	13633	1	4	6	11	seq_286638	TRUE	236193	71882019	71895727	+	upstream	-67370	53738	NearestLocation	Zfp709
chr8	71828568	71844484	15917	4	1	4	5	seq_286639	TRUE	236193	71882019	71895727	+	upstream	-53451	37535	NearestLocation	Zfp709
chr8	72078334	72086814	8481	4	1	4	1	seq_286670	FALSE	258532	72099762	72100706	+	upstream	-21428	12948	NearestLocation	Olfr373
chr8	76135411	76148478	13068	2	4	2	3	seq_287206	FALSE	71831	75448694	75984503	+	downstream	686717	150908	NearestLocation	Iqcm
chr8	76576594	76586952	10359	3	2	3	1	seq_287266	FALSE	110784	76899442	77245012	+	upstream	-322848	312490	NearestLocation	Nr3c2
chr8	79491949	79500094	8146	1	2	3	2	seq_287660	FALSE	17125	79338395	79399518	-	upstream	-92431	92431	NearestLocation	Smad1
chr8	80897120	80907362	10243	2	1	5	1	seq_287850	FALSE	14388	80764438	80880519	-	upstream	-16601	16601	NearestLocation	Gab1
chr8	81613726	81623321	9596	0	3	2	3	seq_287941	FALSE	234515	81342556	82127914	+	inside	271170	271170	NearestLocation	Inpp4b
chr8	82896750	82907591	10842	3	4	0	3	seq_288098	FALSE	330812	82863356	83091268	+	inside	33394	33394	NearestLocation	Rnf150
chr8	83098277	83112792	14516	2	1	2	4	seq_288127	FALSE	71310	83165352	83272934	+	upstream	-67075	52560	NearestLocation	Tbc1d9
chr8	87119442	87127713	8272	1	2	1	4	seq_288654	FALSE	100038706	87169747	87199850	-	downstream	80408	42034	NearestLocation	Gm10637
chr8	87714627	87725567	10941	4	1	0	3	seq_288732	FALSE	330820	87563853	87589424	+	downstream	150774	125203	NearestLocation	4933402J07Rik
chr8	89593071	89604223	11153	3	1	3	1	seq_288988	FALSE	58198	89027235	89044162	-	upstream	-548909	548909	NearestLocation	Sall1
chr8	89996950	90006095	9146	2	1	4	1	seq_289048	FALSE	244579	90247040	90348343	-	downstream	351393	240945	NearestLocation	Tox3
chr8	90153320	90165146	11827	4	4	1	1	seq_289070	FALSE	244579	90247040	90348343	-	downstream	195023	81894	NearestLocation	Tox3
chr8	90533907	90546832	12926	3	2	1	2	seq_289123	FALSE	244579	90247040	90348343	-	upstream	-185564	185564	NearestLocation	Tox3
chr8	90812733	90825659	12927	0	3	5	1	seq_289160	FALSE	100503868	90816145	90817393	-	includeFeature	4660	3412	NearestLocation	Gm19935
chr8	91784058	91792866	8809	3	1	3	1	seq_289287	FALSE	16373	91798525	91802067	-	downstream	18009	5659	NearestLocation	Irx3
chr8	93672259	93681256	8998	0	1	4	3	seq_289535	FALSE	108167546	93707015	93719975	-	downstream	47716	25759	NearestLocation	Gm30606
chr8	97229814	97240947	11134	3	2	1	2	seq_290005	FALSE	14719	95864134	95888547	-	upstream	-1341267	1341267	NearestLocation	Got2
chr8	101266044	101279300	13257	3	0	4	2	seq_290521	FALSE	12552	102632095	102785642	-	downstream	1519598	1352795	NearestLocation	Cdh11
chr8	104926637	104934840	8204	2	4	1	1	seq_291000	FALSE	234673	104926260	104934672	+	overlapEnd	377	168	NearestLocation	Ces2e
chr8	108493327	108505242	11916	1	2	3	3	seq_291486	FALSE	109215	108553252	108584595	-	downstream	91268	48010	NearestLocation	Lncbate1
chr8	109535786	109547328	11543	1	1	5	1	seq_291629	FALSE	64340	109548011	109565861	-	downstream	30075	683	NearestLocation	Dhx38
chr8	109563656	109570146	6491	0	4	1	3	seq_291632	FALSE	64340	109548011	109565861	-	overlapStart	2205	2205	NearestLocation	Dhx38
chr8	112391041	112400421	9381	2	3	3	0	seq_291998	FALSE	102640845	112554617	112569575	-	downstream	178534	154196	NearestLocation	Gm26994
chr8	113850015	113864138	14124	3	2	4	1	seq_292183	FALSE	208936	113697126	113848738	-	upstream	-1277	1277	NearestLocation	Adamts18
chr8	117861393	117870911	9519	2	1	4	3	seq_292764	FALSE	68533	117791645	117801943	-	upstream	-59450	59450	NearestLocation	Mphosph6
chr8	118873381	118880664	7284	3	1	2	3	seq_292914	FALSE	68196	119344488	119348922	+	upstream	-471107	463824	NearestLocation	Hsbp1
chr8	119948064	119960259	12196	3	1	1	4	seq_293077	FALSE	78892	119992438	120052793	+	upstream	-44374	32179	NearestLocation	Crispld2
chr8	121600663	121612132	11470	1	5	1	2	seq_293314	FALSE	67443	121590361	121598760	+	downstream	10302	1903	NearestLocation	Map1lc3b
chr8	123218346	123239362	21017	2	7	2	7	seq_293525	FALSE	71186	123230799	123242359	+	overlapStart	-12453	2997	NearestLocation	4933417D19Rik
chr8	123419917	123429662	9746	4	1	3	2	seq_293549	FALSE	23854	123423527	123463270	+	overlapStart	-3610	3610	NearestLocation	Def8
chr8	123731992	123747735	15744	3	1	3	4	seq_293590	FALSE	234863	123733958	123739941	+	includeFeature	-1966	1966	NearestLocation	6030466F02Rik
chr8	124081445	124093235	11791	3	0	2	5	seq_293638	FALSE	100316819	124022641	124022722	+	downstream	58804	58723	NearestLocation	Mir1967
chr8	125405233	125417485	12253	2	0	4	2	seq_293827	FALSE	244668	125418063	125569808	-	downstream	164575	578	NearestLocation	Sipa1l2
chr8	125596675	125610570	13896	2	2	2	3	seq_293850	FALSE	75930	125584632	125625605	+	inside	12043	12043	NearestLocation	4930567H12Rik
chr8	127160881	127172615	11735	2	1	4	1	seq_294070	FALSE	93742	127063893	127612286	+	inside	96988	96988	NearestLocation	Pard3
chr9	2998999	3043223	44225	7032	5364	6662	7274	seq_294357	TRUE	100628572	3038669	3038743	-	includeFeature	39744	4480	NearestLocation	Mir101c
chr9	3057106	3070158	13053	1	6	2	6	seq_294360	FALSE	100628572	3038669	3038743	-	upstream	-18363	18363	NearestLocation	Mir101c
chr9	6707754	6715114	7361	2	5	1	2	seq_294828	FALSE	71829	6262733	6269846	-	upstream	-437908	437908	NearestLocation	Ddi1
chr9	8686338	8696982	10645	2	3	0	3	seq_295104	FALSE	102634431	8644073	8740988	-	inside	54650	42265	NearestLocation	Gm32014
chr9	11658633	11667119	8487	0	2	1	5	seq_295472	FALSE	244682	9660891	10904775	-	upstream	-753858	753858	NearestLocation	Cntn5
chr9	12159855	12166409	6555	4	1	2	1	seq_295534	FALSE	78219	13091256	13105858	-	downstream	946003	924847	NearestLocation	4930568E12Rik
chr9	13908478	13921400	12923	2	0	1	5	seq_295771	FALSE	72826	13827716	13854987	+	downstream	80762	53491	NearestLocation	Fam76b
chr9	14524661	14536141	11481	1	2	2	4	seq_295862	FALSE	66070	14500617	14510577	+	downstream	24044	14084	NearestLocation	Cwc15
chr9	14735070	14747561	12492	1	3	2	2	seq_295890	FALSE	330890	14696230	14740733	-	overlapStart	5663	5663	NearestLocation	Piwil4
chr9	15069552	15077753	8202	3	0	3	2	seq_295933	FALSE	55991	15002128	15045478	-	upstream	-24074	24074	NearestLocation	Panx1
chr9	16790593	16797296	6704	2	0	4	2	seq_296158	FALSE	270120	15910189	16501285	-	upstream	-289308	289308	NearestLocation	Fat3
chr9	18633229	18648093	14865	4	5	1	4	seq_296385	FALSE	18322	18754553	18755709	-	downstream	122480	106460	NearestLocation	Olfr24
chr9	19550993	19561723	10731	4	1	2	3	seq_296511	FALSE	258515	19566435	19567382	-	downstream	16389	4712	NearestLocation	Olfr854
chr9	22001234	22009647	8414	3	0	4	1	seq_296854	FALSE	77609	21989871	22002634	-	overlapStart	1400	1400	NearestLocation	Ccdc151
chr9	23017212	23033373	16162	2	0	4	3	seq_296977	FALSE	73230	23223076	23485200	+	upstream	-205864	189703	NearestLocation	Bmper
chr9	23058793	23070843	12051	4	2	3	3	seq_296980	FALSE	73230	23223076	23485200	+	upstream	-164283	152233	NearestLocation	Bmper
chr9	25048341	25056521	8181	4	0	1	3	seq_297234	FALSE	102631612	24974208	24998420	+	downstream	74133	49921	NearestLocation	E130101E03Rik
chr9	27639200	27649191	9992	3	1	3	1	seq_297587	FALSE	330908	27790947	28925410	+	upstream	-151747	141756	NearestLocation	Opcml
chr9	28235326	28246971	11646	1	1	3	6	seq_297667	FALSE	330908	27790947	28925410	+	inside	444379	444379	NearestLocation	Opcml
chr9	29580013	29591593	11581	2	2	3	2	seq_297853	FALSE	235106	28994750	29963141	-	inside	383128	371548	NearestLocation	Ntm
chr9	30001349	30010741	9393	3	2	0	4	seq_297909	FALSE	235106	28994750	29963141	-	upstream	-38208	38208	NearestLocation	Ntm
chr9	30618769	30628064	9296	3	1	0	4	seq_297982	FALSE	102607	30427108	30466733	+	downstream	191661	152036	NearestLocation	Snx19
chr9	30647312	30656964	9653	4	1	0	3	seq_297986	TRUE	102607	30427108	30466733	+	downstream	220204	180579	NearestLocation	Snx19
chr9	34278110	34286458	8349	1	1	4	2	seq_298464	FALSE	67703	34486125	35036716	+	upstream	-208015	199667	NearestLocation	Kirrel3
chr9	34599315	34610790	11476	5	1	0	2	seq_298510	FALSE	67703	34486125	35036716	+	inside	113190	113190	NearestLocation	Kirrel3
chr9	35302970	35307195	4226	744	593	748	823	seq_298609	TRUE	71133	35281105	35285423	+	downstream	21865	17547	NearestLocation	4933422A05Rik
chr9	35535472	35548784	13313	2	4	0	6	seq_298645	FALSE	30959	35536647	35558528	-	overlapEnd	23056	1175	NearestLocation	Ddx25
chr9	35785434	35793296	7863	2	1	4	1	seq_298673	FALSE	68171	35788050	35790112	-	includeFeature	4678	2616	NearestLocation	Pate6
chr9	36151619	36156247	4629	0	2	2	4	seq_298718	FALSE	100041618	36134246	36135630	-	upstream	-15989	15989	NearestLocation	Gm3434
chr9	36186761	36199651	12891	3	0	5	0	seq_298721	FALSE	100041618	36134246	36135630	-	upstream	-51131	51131	NearestLocation	Gm3434
chr9	37696799	37710578	13780	2	3	2	1	seq_298931	FALSE	80706	37711348	37712277	-	downstream	15478	770	NearestLocation	Olfr160
chr9	38380066	38390538	10473	2	0	6	0	seq_299011	FALSE	258874	38377883	38378833	+	downstream	2183	1233	NearestLocation	Olfr900
chr9	40986761	40996699	9939	1	3	1	3	seq_299345	FALSE	54698	40969691	41004628	-	inside	17867	7929	NearestLocation	Crtam
chr9	41495513	41504279	8767	1	3	3	2	seq_299416	FALSE	723892	41531425	41531504	+	upstream	-35912	27146	NearestLocation	Mir100
chr9	41835619	41847056	11438	4	3	1	2	seq_299465	FALSE	387236	41581926	41582002	+	downstream	253693	253617	NearestLocation	Mir125b-1
chr9	44145155	44154349	9195	2	2	3	1	seq_299780	FALSE	100038560	44122186	44134485	-	upstream	-10670	10670	NearestLocation	Gm10687
chr9	44665662	44670707	5046	0	3	3	2	seq_299853	FALSE	58866	44673233	44686305	+	upstream	-7571	2526	NearestLocation	Treh
chr9	46596481	46604147	7667	1	1	2	4	seq_300109	FALSE	74361	46303361	46319986	-	upstream	-276495	276495	NearestLocation	4931429L15Rik
chr9	46916109	46924753	8645	3	0	3	2	seq_300160	FALSE	73040	46913493	46927366	+	inside	2616	2613	NearestLocation	2900052N01Rik
chr9	47063335	47073702	10368	4	0	4	1	seq_300183	FALSE	215467	46998741	47003860	+	downstream	64594	59475	NearestLocation	Gm4791
chr9	47335208	47341123	5916	1	1	1	5	seq_300217	FALSE	54725	47530173	47857637	+	upstream	-194965	189050	NearestLocation	Cadm1
chr9	47418709	47426955	8247	2	1	2	4	seq_300229	FALSE	54725	47530173	47857637	+	upstream	-111464	103218	NearestLocation	Cadm1
chr9	48114372	48125822	11451	2	2	2	3	seq_300328	FALSE	244853	48162023	48400025	+	upstream	-47651	36201	NearestLocation	Nxpe4
chr9	49991191	49999783	8593	4	2	1	1	seq_300594	FALSE	17967	49502136	49798925	-	upstream	-192266	192266	NearestLocation	Ncam1
chr9	50374842	50383247	8406	2	3	2	1	seq_300649	FALSE	76509	50494525	50505482	+	upstream	-119683	111278	NearestLocation	Plet1
chr9	51196652	51208579	11928	0	1	6	1	seq_300749	FALSE	18985	51213708	51240080	+	upstream	-17056	5129	NearestLocation	Pou2af1
chr9	52659641	52670809	11169	2	1	3	3	seq_300948	FALSE	330941	52673042	52679780	-	downstream	20139	2233	NearestLocation	AI593442
chr9	54931308	54936881	5574	2	0	2	4	seq_301244	FALSE	26441	54950790	54958030	+	upstream	-19482	13909	NearestLocation	Psma4
chr9	55118370	55132588	14219	4	2	4	3	seq_301267	FALSE	109161	55148854	55207529	+	upstream	-30484	16266	NearestLocation	Ube2q2
chr9	55498296	55508765	10470	2	2	0	4	seq_301314	FALSE	110842	55454508	55512243	-	inside	13947	3478	NearestLocation	Etfa
chr9	56783237	56794006	10770	2	2	2	2	seq_301469	FALSE	235402	56618475	56796468	-	inside	13231	2462	NearestLocation	Lingo1
chr9	58347620	58360772	13153	3	3	2	0	seq_301694	FALSE	74286	58359704	58370455	-	overlapEnd	22835	1068	NearestLocation	Tbc1d21
chr9	60729932	60739133	9202	0	2	5	2	seq_302004	TRUE	67557	60712989	60738801	+	overlapEnd	16943	332	NearestLocation	Larp6
chr9	61709749	61719163	9415	4	2	1	2	seq_302144	FALSE	56040	61913284	61914542	-	downstream	204793	194121	NearestLocation	Rplp1
chr9	61842633	61851974	9342	0	4	1	4	seq_302162	FALSE	56040	61913284	61914542	-	downstream	71909	61310	NearestLocation	Rplp1
chr9	62715574	62723963	8390	1	0	3	4	seq_302289	FALSE	319480	62677826	62783982	+	inside	37748	37748	NearestLocation	Itga11
chr9	63160309	63172153	11845	4	1	2	2	seq_302350	FALSE	207667	63138170	63148961	-	upstream	-11348	11348	NearestLocation	Skor1
chr9	63806263	63815569	9307	4	2	2	2	seq_302448	FALSE	17127	63646767	63757994	-	upstream	-48269	48269	NearestLocation	Smad3
chr9	64509534	64523281	13748	5	1	2	2	seq_302544	FALSE	214058	64385626	64709205	+	inside	123908	123908	NearestLocation	Megf11
chr9	66145418	66155324	9907	1	1	4	2	seq_302761	FALSE	13143	66158223	66272242	+	upstream	-12805	2899	NearestLocation	Dapk2
chr9	68023244	68030513	7270	2	0	3	3	seq_303028	FALSE	434412	68017964	68025714	-	overlapStart	2470	2470	NearestLocation	Gm20745
chr9	68273750	68284546	10797	3	1	3	2	seq_303065	FALSE	74951	68470902	68520200	-	downstream	246450	186356	NearestLocation	4930502A04Rik
chr9	71234028	71245533	11506	3	4	0	3	seq_303465	FALSE	19378	71215789	71296243	+	inside	18239	18239	NearestLocation	Aldh1a2
chr9	71272613	71281861	9249	2	3	2	2	seq_303469	FALSE	19378	71215789	71296243	+	inside	56824	14382	NearestLocation	Aldh1a2
chr9	72680652	72692107	11456	4	1	2	2	seq_303659	FALSE	17999	72662346	72749852	+	inside	18306	18306	NearestLocation	Nedd4
chr9	75273184	75287525	14342	3	3	2	3	seq_304022	FALSE	14697	75306288	75345876	+	upstream	-33104	18763	NearestLocation	Gnb5
chr9	77516139	77525423	9285	3	2	1	3	seq_304292	FALSE	214345	77430823	77544870	-	inside	28731	19447	NearestLocation	Lrrc1
chr9	97992857	98004712	11856	1	2	5	2	seq_306843	FALSE	66737	98003420	98012175	+	overlapStart	-10563	1292	NearestLocation	4921534H16Rik
chr9	100132324	100143613	11290	3	2	3	1	seq_307134	FALSE	108970	100022300	100034672	+	downstream	110024	97652	NearestLocation	4930519F24Rik
chr9	101614232	101627317	13086	4	0	2	2	seq_307318	FALSE	102633035	101342194	101348017	+	downstream	272038	266215	NearestLocation	Gm28979
chr9	101823480	101834064	10585	0	1	4	3	seq_307349	FALSE	102466241	102304924	102304975	-	downstream	481495	470860	NearestLocation	Mir7243
chr9	102003389	102013963	10575	0	1	3	4	seq_307370	FALSE	102466241	102304924	102304975	-	downstream	301586	290961	NearestLocation	Mir7243
chr9	105879505	105888211	8707	0	2	5	1	seq_307908	FALSE	245026	105687809	105828160	-	upstream	-51345	51345	NearestLocation	Col6a6
chr9	106427966	106439103	11138	2	0	6	2	seq_307978	FALSE	109652	106432981	106438319	-	includeFeature	10353	784	NearestLocation	Acy1
chr9	109812440	109820609	8170	0	1	3	6	seq_308427	FALSE	78709	109812280	109826633	+	inside	160	160	NearestLocation	Spink8
chr9	111401946	111409761	7816	2	1	2	3	seq_308640	FALSE	245038	111439081	111489118	+	upstream	-37135	29320	NearestLocation	Dclk3
chr9	111508653	111517279	8627	2	1	1	5	seq_308651	FALSE	245038	111439081	111489118	+	downstream	69572	19535	NearestLocation	Dclk3
chr9	114888658	114899576	10919	2	1	4	1	seq_309113	FALSE	333433	114899341	114933987	-	overlapEnd	45329	235	NearestLocation	Gpd1l
chr9	115669345	115679284	9940	1	1	2	4	seq_309224	FALSE	73748	115909455	116076176	+	upstream	-240110	230171	NearestLocation	Gadl1
chr9	116267288	116276523	9236	1	4	3	0	seq_309308	FALSE	100043817	116189180	116194886	+	downstream	78108	72402	NearestLocation	Gm4668
chr9	117898119	117906027	7909	4	2	1	2	seq_309529	FALSE	27215	118040499	118069794	+	upstream	-142380	134472	NearestLocation	Azi2
chr9	117909666	117923721	14056	4	1	3	2	seq_309530	FALSE	27215	118040499	118069794	+	upstream	-130833	116778	NearestLocation	Azi2
chr9	118619905	118633014	13110	3	4	1	1	seq_309623	FALSE	104099	118606690	118901003	+	inside	13215	13215	NearestLocation	Itga9
chr9	121421905	121429513	7609	0	2	1	5	seq_310013	FALSE	12424	121489824	121495694	-	downstream	73789	60311	NearestLocation	Cck
chr9	123459536	123466331	6796	5	1	3	4	seq_310288	TRUE	29806	123478706	123521552	+	upstream	-19170	12375	NearestLocation	Limd1
chr9	123926545	123937106	10562	2	0	2	4	seq_310345	TRUE	12768	123962124	123968692	-	downstream	42147	25018	NearestLocation	Ccr1
chr9	124252531	124259014	6484	4	2	6	5	seq_310375	TRUE	630836	124291804	124312696	-	downstream	60165	32790	NearestLocation	2010315B03Rik
chrX	31156634	31165052	8419	4	2	2	3	seq_312471	TRUE	668963	4289286	31383886	-	inside	227252	218834	NearestLocation	Btbd35f20
chrX	31166776	31187045	20270	3	3	6	7	seq_312472	TRUE	668963	4289286	31383886	-	inside	217110	196841	NearestLocation	Btbd35f20
chrX	31720892	31729118	8227	2	0	4	3	seq_312506	TRUE	74851	31962044	31962821	+	upstream	-241152	232926	NearestLocation	Spin2-ps1
chrX	31758192	31779422	21231	8	3	4	5	seq_312511	TRUE	74851	31962044	31962821	+	upstream	-203852	182622	NearestLocation	Spin2-ps1
chrX	33927038	33935039	8002	2	2	5	2	seq_312678	TRUE	100040732	33700649	33702349	-	upstream	-224689	224689	NearestLocation	Btbd35f14
chrX	51720399	51729929	9531	2	0	3	3	seq_314073	FALSE	50786	51387212	51681856	-	upstream	-38543	38543	NearestLocation	Hs6st2
chrX	76595451	76600138	4688	16	7	21	13	seq_315985	TRUE	74987	76582610	76602924	-	inside	7473	2786	NearestLocation	Cldn34d
chrX	143482004	143484110	2107	6	10	1	7	seq_321085	TRUE	18481	143518591	143797796	+	upstream	-36587	34481	NearestLocation	Pak3
chrX	169972227	169979877	7651	0	5	0	4	seq_323201	TRUE	66747	169776257	169779635	-	upstream	-192592	192592	NearestLocation	4933400A11Rik
chrY	256826	267447	10622	9	2	3	6	seq_323222	TRUE	22767	725128	797409	-	downstream	540583	457681	NearestLocation	Zfy1
chrY	90736337	90748235	11899	6	5	9	13	seq_325893	TRUE	170942	90784738	90816465	+	upstream	-48401	36503	NearestLocation	Erdr1
chrY	90795877	90814959	19083	11	4	12	10	seq_325897	TRUE	170942	90784738	90816465	+	inside	11139	1506	NearestLocation	Erdr1

## Sheet: Foglio1
								Supplementary Table S1
					Main properties of annoted genes closest to all SCR
Chromosome			SCR					CR	black		position		feat		distance	short	location
n	start	end	size	L1	C1	C2	L1	ID	flag	feature	start	end	strand	insideFeature	toFeature	distance	over/near	gene
1	5868561	5877408	8848	2	3	3	1	380		226304	5913707	5917398	-	downstream	48837	36299	nearest	Npbwr1
1	7348292	7360059	11768	1	2	2	4	564		319263	7088920	7173628	+	downstream	259372	174664	nearest	Pcmtd1
1	9561722	9569626	7905	2	0	4	2	826		76187	9547948	9580673	+	inside	13774	11047	nearest	Adhfe1
1	10711150	10723318	12169	1	2	3	3	977		329093	10324720	10719945	-	overlapStart	8795	3373	nearest	Cpa6
1	11991884	12003392	11509	0	1	2	6	1152		102465961	12425986	12426106	+	upstream	-434102	422594	nearest	Mir6341
1	15397228	15405834	8607	0	2	3	3	1617		98741	15287254	15723750	+	inside	109974	109974	nearest	Kcnb2
1	18212973	18221286	8314	3	2	4	1	1990		654454	18210053	18223564	-	inside	10591	2278	nearest	Defb44-ps
1	21388722	21399506	10785	3	2	2	2	2399		98582	21383556	21386373	+	downstream	5166	2349	nearest	Khdc1b
1	23962496	23978799	16304	4	1	2	4	2741		68002	23995939	24005656	-	downstream	43160	17140	nearest	Sdhaf4
1	24610806	24614400	3595	0	20	10	0	2818	^	12823	24261890	24587472	-	upstream	-23334	23334	nearest	Col19a1
1	26220296	26230739	10444	1	0	4	4	3025		210933	25067476	25829707	-	upstream	-390589	390589	nearest	Adgrb3
1	26680642	26689276	8635	4	1	3	1	3075	^	210940	26681814	26687460	-	includeFeature	6818	1172	nearest	4931408C20Rik
1	30719888	30733785	13898	1	2	3	3	3561		213109	30802339	30873921	-	downstream	154033	68554	nearest	Phf3
1	34809660	34817693	8034	2	1	2	3	4106		214469	34813219	34843065	-	overlapEnd	33405	3559	nearest	Fam168b
1	35607672	35615811	8140	2	1	3	2	4214		50785	36068400	36106446	+	upstream	-460728	452589	nearest	Hs6st1
1	35620032	35632704	12673	4	2	2	3	4215		50785	36068400	36106446	+	upstream	-448368	435696	nearest	Hs6st1
1	35903004	35916088	13085	3	0	5	3	4257		50785	36068400	36106446	+	upstream	-165396	152312	nearest	Hs6st1
1	36044186	36057401	13216	2	3	0	3	4275		50785	36068400	36106446	+	upstream	-24214	10999	nearest	Hs6st1
1	36263518	36270388	6871	1	5	0	2	4304		214854	36264597	36274679	-	overlapEnd	11161	1079	nearest	Neurl3
1	39645045	39657239	12195	3	1	3	1	4770		263764	39618406	39651474	-	overlapStart	6429	5765	nearest	Creg2
1	40929683	40945368	15686	1	1	5	4	4942		381339	40805601	40856887	+	downstream	124082	72796	nearest	Tmem182
1	41382863	41394076	11214	6	0	3	1	4996		74897	41167587	41181252	-	upstream	-201611	201611	nearest	4930448I06Rik
1	43045744	43057590	11847	2	1	1	5	5218		73122	43047200	43098637	-	overlapEnd	52893	1456	nearest	Tgfbrap1
1	48684698	48697887	13190	1	2	2	5	5934		442837	49244616	49340443	+	upstream	-559918	546729	nearest	C230029F24Rik
1	54761718	54772594	10877	2	3	2	1	6677		329154	54645340	54926387	-	inside	164669	116378	nearest	Ankrd44
1	55866283	55876141	9859	1	1	4	3	6816		329159	55931241	55972328	+	upstream	-64958	55100	nearest	9130227L01Rik
1	56983179	56997170	13992	3	3	2	4	6946		212712	56793981	56978650	-	upstream	-4529	4529	nearest	Satb2
1	57720892	57731684	10793	2	4	3	2	7053		67198	57774162	57948394	+	upstream	-53270	42478	nearest	Spats2l
1	58045863	58055112	9250	1	2	3	3	7105		11761	58029931	58106413	+	inside	15932	15932	nearest	Aox1
1	59899723	59909873	10151	2	2	3	3	7353		72750	59913006	59985346	+	upstream	-13283	3133	nearest	Fam117b
1	64406223	64419069	12847	3	2	2	1	7959		12912	64532645	64604548	+	upstream	-126422	113576	nearest	Creb1
1	74424867	74439921	15055	2	2	1	6	9202		22349	74409376	74435559	+	overlapEnd	15491	4362	nearest	Vil1
1	78211131	78222730	11600	1	3	4	4	9694		18505	78101267	78197134	-	upstream	-13997	13997	nearest	Pax3
1	84127972	84139015	11044	2	0	4	3	10435		102465181	84218849	84218961	-	downstream	90989	79834	nearest	Mir6353
1	85007485	85016288	8804	2	2	3	1	10548	^	71781	84905898	84935134	-	upstream	-72351	72351	nearest	Slc16a14
1	85065115	85076436	11322	3	2	3	2	10555	^	381287	85083069	85109853	-	downstream	44738	6633	nearest	A530032D15Rik
1	85083784	85097523	13740	3	2	4	5	10557	^	381287	85083069	85109853	-	inside	26069	715	nearest	A530032D15Rik
1	85104516	85119475	14960	7	9	5	4	10559	^	381287	85083069	85109853	-	overlapStart	5337	5337	nearest	A530032D15Rik
1	85179284	85189522	10239	3	2	2	3	10569	^	665378	85199613	85213786	+	upstream	-20329	10091	nearest	Gm7609
1	85244010	85261015	17006	6	7	8	8	10580	^	620078	85112267	85270566	-	inside	26556	9551	nearest	C130026I21Rik
1	85268381	85278030	9650	1	1	3	6	10582	^	620078	85112267	85270566	-	overlapStart	2185	2185	nearest	C130026I21Rik
1	85324476	85334378	9903	2	3	4	4	10589	^	620078	85112267	85270566	-	upstream	-53910	53910	nearest	C130026I21Rik
1	85338196	85347791	9596	5	3	4	2	10590	^	620078	85112267	85270566	-	upstream	-67630	67630	nearest	C130026I21Rik
1	85499346	85509344	9999	3	6	0	4	10600	^	109032	85576899	85598817	-	downstream	99471	67555	nearest	Sp110
1	85549399	85562437	13039	1	4	4	3	10606	^	109032	85576899	85598817	-	downstream	49418	14462	nearest	Sp110
1	87761632	87775871	14240	1	6	0	4	10888		77040	87755870	87792428	+	inside	5762	5762	nearest	Atg16l1
1	88211334	88254196	42863	19	22	32	27	10943	^	394436	88211959	88218997	+	includeFeature	-625	625	nearest	Ugt1a1
1	88257012	88270738	13727	9	4	4	7	10945	^	381280	88262471	88277633	-	overlapEnd	20621	5459	nearest	Hjurp
1	88271854	88291711	19858	9	6	6	10	10946	^	381280	88262471	88277633	-	overlapStart	5779	5779	nearest	Hjurp
1	88293574	88311191	17618	9	4	9	10	10947	^	171382	88277661	88389293	+	inside	15913	15913	nearest	Trpm8
1	89136824	89148640	11817	1	1	2	4	11058		98402	89070415	89155068	+	inside	66409	6428	nearest	Sh3bp4
1	89473594	89484869	11276	1	1	3	3	11100		347722	89454806	89897617	+	inside	18788	18788	nearest	Agap1
1	91198692	91210041	11350	1	2	4	2	11354		51801	91179822	91225196	+	inside	18870	15155	nearest	Ramp1
1	92542923	92556516	13594	2	1	3	3	11533		259039	92573125	92574206	+	upstream	-30202	16609	nearest	Olfr1413
1	93060625	93068875	8251	2	2	4	0	11605		16560	93015464	93101951	-	inside	41326	33076	nearest	Kif1a
1	93671748	93682095	10348	2	2	3	3	11692		51800	93685660	93695764	+	upstream	-13912	3565	nearest	Bok
1	94530294	94540121	9828	2	2	1	3	11801		74689	94797083	94802472	+	upstream	-266789	256962	nearest	4930440C22Rik
1	97998508	98011697	13190	1	1	4	3	12247		78603	98031116	98047793	-	downstream	49285	19419	nearest	B230216N24Rik
1	98190845	98201385	10541	2	2	2	2	12269		102634194	98173648	98190698	+	downstream	17197	147	nearest	Gm29461
1	98719464	98727866	8403	3	1	1	3	12331		70866	98421124	98516991	+	downstream	298340	202473	nearest	Slco6d1
1	99591129	99602428	11300	4	2	1	1	12446		241175	99772765	100485942	+	upstream	-181636	170337	nearest	Cntnap5b
1	100673077	100681742	8666	1	4	3	1	12592		100504525	101155809	101175202	+	upstream	-482732	474067	nearest	Gm20268
1	101688658	101698043	9386	1	3	2	2	12712		100504525	101155809	101175202	+	downstream	532849	513456	nearest	Gm20268
1	102008903	102018941	10039	3	1	3	1	12761		100504525	101155809	101175202	+	downstream	853094	833701	nearest	Gm20268
1	102188986	102196447	7462	3	1	3	1	12784		100504525	101155809	101175202	+	downstream	1033177	1013784	nearest	Gm20268
1	105485441	105497792	12352	1	2	4	1	13216		320311	105276914	105356710	-	upstream	-128731	128731	nearest	Rnf152
1	107157637	107166352	8716	0	2	2	4	13439		394252	107078167	107083506	-	upstream	-74131	74131	nearest	Serpinb3d
1	110735751	110747997	12247	3	1	1	3	13893		227485	110888326	110977584	-	downstream	241833	140329	nearest	Cdh19
1	112584162	112593322	9161	1	1	1	5	14105		319901	111858702	111864918	-	upstream	-719244	719244	nearest	Dsel
1	113089533	113100607	11075	2	3	3	3	14168		319901	111858702	111864918	-	upstream	-1224615	1224615	nearest	Dsel
1	115862797	115869482	6686	1	2	4	1	14513		636808	115684756	116587323	+	inside	178041	178041	nearest	Cntnap5a
1	116207286	116214266	6981	4	0	3	1	14559		636808	115684756	116587323	+	inside	522530	373057	nearest	Cntnap5a
1	117022354	117032957	10604	1	2	3	2	14662		22099	118294778	118311462	-	downstream	1289108	1261821	nearest	Tsn
1	117424551	117439979	15429	4	2	2	3	14716		22099	118294778	118311462	-	downstream	886911	854799	nearest	Tsn
1	117953105	117961891	8787	1	3	5	0	14797		22099	118294778	118311462	-	downstream	358357	332887	nearest	Tsn
1	119003081	119014806	11726	3	1	2	3	14943		14633	118834132	119053619	-	inside	50538	38813	nearest	Gli2
1	119229074	119237845	8772	2	4	2	1	14974		14633	118834132	119053619	-	upstream	-175455	175455	nearest	Gli2
1	119300500	119309441	8942	2	2	3	1	14984		16324	119415465	119422248	-	downstream	121748	106024	nearest	Inhbb
1	122441839	122451921	10083	3	1	3	1	15427		102638832	122205145	122252180	+	downstream	236694	189659	nearest	Gm28590
1	125079246	125091860	12615	3	3	1	2	15785		269109	123321471	124846039	-	upstream	-233207	233207	nearest	Dpp10
1	127474757	127483341	8585	2	1	4	1	16098		72160	127486546	127679548	-	downstream	204791	3205	nearest	Tmem163
1	130809231	130820696	11466	0	3	3	3	16556		18703	130826684	130852249	+	upstream	-17453	5988	nearest	Pigr
1	131058316	131063658	5343	1	0	2	5	16589		17164	131053700	131097826	-	inside	39510	4616	nearest	Mapkapk2
1	134408498	134417409	8912	1	3	1	3	17065		72674	134415378	134433351	+	overlapStart	-6880	2031	nearest	Adipor1
1	134987172	134998815	11644	0	4	2	3	17134		67196	134962565	134974162	+	downstream	24607	13010	nearest	Ube2t
1	135376761	135387228	10468	2	2	1	3	17190		77552	135371057	135375237	-	upstream	-1524	1524	nearest	Shisa4
1	141242917	141249924	7008	1	2	4	1	17933		75910	140570176	140656404	-	upstream	-586513	586513	nearest	4930590L20Rik
1	152669434	152679385	9952	2	3	2	1	19264		71281	152750551	152757544	+	upstream	-81117	71166	nearest	Apobec4
1	153341675	153350057	8383	1	1	5	1	19356		226519	153218922	153332786	-	upstream	-8889	8889	nearest	Lamc1
1	153637906	153649537	11632	2	4	1	3	19392		67792	153653025	153700323	+	upstream	-15119	3488	nearest	Rgs8
1	154659232	154669035	9804	2	1	3	2	19529		12290	154390731	154884501	-	inside	225269	215466	nearest	Cacna1e
1	156709681	156717589	7909	3	2	2	1	19802		215015	156678532	156719086	-	inside	9405	1497	nearest	Fam20b
1	157070875	157084824	13950	4	2	3	1	19856		73435	157099139	157108680	-	downstream	37805	14315	nearest	Tex35
1	164077325	164085363	8039	2	1	1	4	20781		20343	164061982	164084181	+	overlapEnd	15343	1182	nearest	Sell
1	164174691	164185318	10628	2	3	2	2	20793		100503816	164148591	164152217	-	upstream	-22474	22474	nearest	Gm16548
1	164592754	164603254	10501	1	3	1	3	20844		102635083	164503309	164514882	+	downstream	89445	77872	nearest	Gm26685
1	166088487	166102143	13657	2	1	4	1	21035		240892	166098148	166127922	-	overlapEnd	39435	3995	nearest	Dusp27
1	166487313	166495702	8390	3	1	1	3	21088		226601	166483613	166497588	-	inside	10275	1886	nearest	Gm4846
1	166875876	166885844	9969	2	2	2	3	21140		100503962	166974023	166999728	-	downstream	123852	88179	nearest	Gm16701
1	167644307	167661315	17009	4	1	0	3	21249		110648	167689237	167848741	+	upstream	-44930	27922	nearest	Lmx1a
1	168894090	168905295	11206	3	1	3	1	21426		102466632	169018974	169019089	-	downstream	124999	113679	nearest	Mir6354
1	169383839	169391997	8159	3	3	1	3	21484		66977	169497934	169531464	-	downstream	147625	105937	nearest	Nuf2
1	171865312	171879516	14205	5	1	2	4	21820		12523	171839697	171890718	+	inside	25615	11202	nearest	Cd84
1	175241383	175255093	13711	2	3	1	3	22274		24012	175059087	175492500	-	inside	251117	182296	nearest	Rgs7
1	177888016	177897894	9879	3	1	2	3	22602		631584	177808431	177962678	+	inside	79585	64784	nearest	Catspere1
1	177949274	177955889	6616	0	1	6	1	22610		545391	177983423	178172705	+	upstream	-34149	27534	nearest	Catspere2
1	179119044	179130000	10957	1	0	4	4	22768		69726	178951960	179518041	-	inside	398997	167084	nearest	Smyd3
1	179602055	179614972	12918	3	1	4	2	22832		109232	179668210	179687189	+	upstream	-66155	53238	nearest	Sccpdh
1	182587934	182595981	8048	3	2	1	2	23234		170725	182565007	182632352	+	inside	22927	22927	nearest	Capn8
1	183092545	183104386	11842	6	0	2	2	23299		68897	183086266	183221522	-	inside	128977	6279	nearest	Disp1
1	183295512	183302554	7043	7	6	9	4	23326	^	108909	183297049	183325476	+	overlapStart	-1537	1537	nearest	Aida
1	183416410	183424246	7837	3	1	1	3	23339		78772	183418462	183436808	+	overlapStart	-2052	2052	nearest	Hhipl2
1	187719763	187737129	17367	5	2	1	4	23920		26381	187608791	188214885	+	inside	110972	110972	nearest	Esrrg
1	193164803	193176347	11545	0	2	4	4	24653		319266	193168046	193177832	+	overlapStart	-3243	1485	nearest	A130010J15Rik
1	194412697	194422834	10138	2	2	3	1	24832		74942	194212187	194222759	-	upstream	-189938	189938	nearest	4930503O07Rik
1	195297184	195305576	8393	1	2	1	4	24952		12902	195136811	195176716	-	upstream	-120468	120468	nearest	Cr2
2	4660339	4673423	13085	0	3	2	4	159000		67229	4622058	4652113	-	upstream	-8226	8226	nearest	Prpf18
2	6136608	6146537	9930	2	1	3	2	159198		100038358	6132869	6140568	+	overlapEnd	3739	3739	nearest	Gm10857
2	6514455	6524774	10320	3	1	1	3	159257		98910	6322667	6446390	+	downstream	191788	68065	nearest	Usp6nl
2	8269885	8279054	9170	1	1	3	3	159476	^	14007	6539694	7509563	-	upstream	-760322	760322	nearest	Celf2
2	10791465	10802760	11296	3	0	3	2	159801		100316831	10518155	10518279	+	downstream	273310	273186	nearest	Mir669h
2	11210564	11222066	11503	5	0	2	3	159859		18761	11172108	11301222	+	inside	38456	38456	nearest	Prkcq
2	11292574	11303067	10494	3	1	2	2	159869		100503147	11339488	11344111	+	upstream	-46914	36421	nearest	Gm13293
2	11734543	11742095	7553	4	3	1	0	159937		16169	11705290	11734317	+	downstream	29253	226	nearest	Il15ra
2	13091880	13107452	15573	3	4	4	1	160113		227580	13003457	13011806	-	upstream	-80074	80074	nearest	C1ql3
2	13116052	13126537	10486	4	1	0	4	160115		227580	13003457	13011806	-	upstream	-104246	104246	nearest	C1ql3
2	15775948	15787757	11810	1	2	3	2	160440		102635496	15526479	16255555	+	inside	249469	249469	nearest	Malrd1
2	18999826	19009877	10052	1	2	3	2	160860		74629	18998343	18999804	+	downstream	1483	22	nearest	4930426L09Rik
2	19213738	19225389	11652	0	0	2	6	160893		70882	19199302	19310241	+	inside	14436	14436	nearest	Armc3
2	20211385	20225704	14320	2	5	1	4	161013		208618	19909780	20810713	+	inside	301605	301605	nearest	Etl4
2	21206745	21217928	11184	2	1	4	2	161149		208967	21205724	21215009	+	overlapEnd	1021	1021	nearest	Thnsl1
2	24123036	24135382	12347	2	3	3	2	161520		69677	24153161	24160519	+	upstream	-30125	17779	nearest	Il1f8
2	24140367	24150787	10421	2	2	3	1	161521		69677	24153161	24160519	+	upstream	-12794	2374	nearest	Il1f8
2	24748237	24761120	12884	2	1	1	4	161606		12287	24603887	24763152	-	inside	14915	2032	nearest	Cacna1b
2	25331920	25343963	12044	1	4	0	3	161694		227619	25332338	25352212	+	overlapStart	-418	418	nearest	Man1b1
2	27740366	27749784	9419	4	1	2	1	162034		20181	27676440	27762957	+	inside	63926	13173	nearest	Rxra
2	28261056	28269162	8107	1	2	1	5	162103		56177	28192992	28230736	+	downstream	68064	30320	nearest	Olfm1
2	28721493	28732781	11289	2	3	2	2	162172		100526498	28733278	28733351	+	upstream	-11785	497	nearest	Mir3088
2	31526792	31536089	9298	1	2	1	4	162573		432466	31497772	31520531	+	downstream	29020	6261	nearest	Gm5424
2	31884720	31897032	12313	3	0	4	1	162625		23928	31887291	31946539	+	overlapStart	-2571	2571	nearest	Lamc3
2	32561077	32577490	16414	3	0	5	2	162714		227733	32575718	32583782	+	overlapStart	-14641	1772	nearest	Pip5kl1
2	32884009	32895282	11274	1	1	2	4	162758		227737	32876114	32925254	+	inside	7895	7895	nearest	Fam129b
2	33012789	33020471	7683	2	1	1	4	162774		56017	32972990	32982083	-	upstream	-30706	30706	nearest	Slc2a8
2	33101769	33110637	8869	2	2	3	2	162788		99326	32986224	33131654	-	inside	29885	21017	nearest	Garnl3
2	35674767	35689823	15057	1	4	1	3	163146		100042194	35549538	35558702	-	upstream	-116065	116065	nearest	Gm13446
2	35958592	35971022	12431	1	4	1	2	163190		74410	35751241	35979913	-	inside	21321	8891	nearest	Ttll11
2	36618558	36629934	11377	1	5	3	1	163280		258947	36640041	36640976	+	upstream	-21483	10107	nearest	Olfr345
2	37162694	37169609	6916	3	0	3	2	163353	^	258656	37201243	37202181	+	upstream	-38549	31634	nearest	Olfr365
2	38411999	38425241	13243	1	0	2	6	163510		16870	38339281	38369733	+	downstream	72718	42266	nearest	Lhx2
2	40420765	40434315	13551	1	3	3	1	163761		67857	39194354	39226451	-	upstream	-1194314	1194314	nearest	Ppp6c
2	41194739	41208307	13569	0	2	2	4	163852		102465171	42447439	42447568	-	downstream	1252829	1239132	nearest	Mir6336
2	48369281	48377797	8517	4	1	2	1	164754		11480	48814109	48903269	+	upstream	-444828	436312	nearest	Acvr2a
2	48690781	48703346	12566	3	0	5	6	164792		11480	48814109	48903269	+	upstream	-123328	110763	nearest	Acvr2a
2	51620546	51631362	10817	2	2	2	2	165181		387511	51627511	51628408	+	includeFeature	-6965	2954	nearest	Tas2r134
2	53027031	53035937	8907	5	1	1	2	165372		56194	53134704	53191284	-	downstream	164253	98767	nearest	Prpf40a
2	70843806	70858848	15043	1	5	2	4	167637		228012	70712407	70825728	-	upstream	-18078	18078	nearest	Tlk1
2	71802241	71813613	11373	3	1	4	1	167755		16403	71745616	71858416	+	inside	56625	44803	nearest	Itga6
2	72023773	72033330	9558	2	2	2	3	167782		56508	71981240	72257474	+	inside	42533	42533	nearest	Rapgef4
2	73492739	73505577	12839	1	3	2	3	167995		215280	73429610	73529734	-	inside	36995	24157	nearest	Wipf1
2	76734777	76747101	12325	3	2	3	4	168425		83435	76675281	76696828	+	downstream	59496	37949	nearest	Plekha3
2	77978255	77991907	13653	4	1	1	3	168598		80744	77881159	77946375	-	upstream	-31880	31880	nearest	Cwc22
2	80606406	80613466	7061	2	1	0	5	168916		68082	80617045	80632361	+	upstream	-10639	3579	nearest	Dusp19
2	89421456	89430366	8911	2	0	3	3	169984		258972	89417494	89418411	-	upstream	-3045	3045	nearest	Olfr1239
2	90925513	90935250	9738	3	0	3	3	170157		13046	90940382	91019497	+	upstream	-14869	5132	nearest	Celf1
2	93228543	93238197	9655	2	0	2	4	170479		277414	93187548	93201759	+	downstream	40995	26784	nearest	Trp53i11
2	94709186	94717942	8757	1	0	2	5	170696		11800	94411682	94438136	-	upstream	-271050	271050	nearest	Api5
2	94872329	94884272	11944	1	1	3	3	170719	^	11800	94411682	94438136	-	upstream	-434193	434193	nearest	Api5
2	98661228	98669875	8648	14360	10690	13618	14881	171180	^	241568	96318169	97631666	+	downstream	2343059	1029562	nearest	Lrrc4c
2	98762852	98773312	10461	4	2	3	1	171195		241568	96318169	97631666	+	downstream	2444683	1131186	nearest	Lrrc4c
2	101773764	101784509	10746	2	0	5	1	171532		22034	101678429	101701669	+	downstream	95335	72095	nearest	Traf6
2	103050950	103061077	10128	3	2	2	1	171703		27402	103021075	103073513	-	inside	22563	12436	nearest	Pdhx
2	104345896	104360141	14246	2	2	3	2	171889		241589	104143073	104411013	-	inside	65117	50872	nearest	D430041D05Rik
2	106666249	106674772	8524	4	1	0	3	172187		102640562	106642914	106650364	-	upstream	-15885	15885	nearest	BB218582
2	114086643	114101239	14597	1	3	2	5	173116		11464	114047282	114053548	-	upstream	-33095	33095	nearest	Actc1
2	116554485	116563642	9158	4	1	3	4	173461		67356	116878691	116892494	+	upstream	-324206	315049	nearest	Tmco5
2	117054629	117069410	14782	4	0	2	3	173532		114715	117121374	117182279	+	upstream	-66745	51964	nearest	Spred1
2	117279335	117297102	17768	2	3	2	3	173560		68215	117249739	117271540	+	downstream	29596	7795	nearest	Fam98b
2	118678614	118692117	13504	3	2	1	2	173759		383787	118699103	118703963	-	downstream	25349	6986	nearest	Ankrd63
2	120189397	120200696	11300	4	2	1	1	173964		98878	120089175	120154606	-	upstream	-34791	34791	nearest	Ehd4
2	120638863	120647170	8308	2	2	4	2	174030	^	668880	120629121	120731895	+	inside	9742	9742	nearest	Stard9
2	124113637	124122195	8559	0	4	3	2	174482		74702	124123636	124129956	-	downstream	16319	1441	nearest	4930517E11Rik
2	126588037	126601077	13041	0	2	4	3	174835		15186	126593667	126619299	-	overlapEnd	31262	5630	nearest	Hdc
2	131193078	131204795	11718	3	3	2	1	175421		69596	131207078	131213514	+	upstream	-14000	2283	nearest	Ap5s1
2	142080067	142094561	14495	1	2	4	2	176823		16558	142617474	142901531	-	downstream	821464	522913	nearest	Kif16b
2	142528042	142539746	11705	1	2	4	2	176878		16558	142617474	142901531	-	downstream	373489	77728	nearest	Kif16b
2	143490546	143498846	8301	1	2	2	3	177007		18549	143546156	143816285	+	upstream	-55610	47310	nearest	Pcsk2
2	143959852	143971627	11776	3	4	1	1	177069		81910	143947395	144011263	-	inside	51411	12457	nearest	Rrbp1
2	148418425	148425627	7203	3	0	2	3	177668		21824	148404466	148408188	-	upstream	-10237	10237	nearest	Thbd
2	148478801	148490447	11647	1	3	2	3	177674		17064	148436640	148443563	-	upstream	-35238	35238	nearest	Cd93
2	149844477	149855565	11089	2	4	2	1	177861		433485	149829211	150004392	+	inside	15266	15266	nearest	Syndig1
2	152244466	152254364	9899	3	2	1	2	178170		12995	152226839	152281852	+	inside	17627	17627	nearest	Csnk2a1
2	152767902	152776250	8349	4	1	1	2	178236		84682	152754173	152765037	+	downstream	13729	2865	nearest	Cox4i2
2	153751745	153762915	11171	1	1	4	3	178365		13589	153741274	153773310	+	inside	10471	10395	nearest	Mapre1
2	155271691	155285916	14226	3	1	6	4	178576		66734	155276297	155278073	+	includeFeature	-4606	4606	nearest	Map1lc3a
2	157251220	157261650	10431	3	1	1	5	178853		20014	157279017	157326319	+	upstream	-27797	17367	nearest	Rpn2
2	157828672	157839557	10886	2	1	2	3	178934	^	277432	157914653	157944719	+	upstream	-85981	75096	nearest	Vstm2l
2	158025628	158035434	9807	2	3	5	1	178962		75425	157981803	158028433	-	overlapStart	2805	2805	nearest	Tti1
2	159000512	159011693	11182	4	0	2	3	179091		71715	158794807	158858214	+	downstream	205705	142298	nearest	Dhx35
2	165630581	165641103	10523	1	2	4	1	180036		14049	165595032	165771727	+	inside	35549	35549	nearest	Eya2
2	167276817	167288741	11925	1	1	5	3	180276		19223	167191805	167240604	-	upstream	-36213	36213	nearest	Ptgis
2	169496909	169504114	7206	2	2	2	2	180563		228911	169633013	170071816	+	upstream	-136104	128899	nearest	Tshz2
2	169599004	169612557	13554	5	1	4	1	180576		228911	169633013	170071816	+	upstream	-34009	20456	nearest	Tshz2
2	169727266	169740279	13014	3	2	2	1	180596		228911	169633013	170071816	+	inside	94253	94253	nearest	Tshz2
2	170299615	170309991	10377	1	2	5	0	180678		73303	170356361	170380435	+	upstream	-56746	46370	nearest	Bcas1os2
2	173987119	174002177	15059	2	3	3	5	181176		228960	174076308	174099771	+	upstream	-89189	74131	nearest	Stx16
2	174510887	174527142	16256	2	3	3	3	181251		66390	174465067	174473081	-	upstream	-37806	37806	nearest	Prelid3b
2	174652129	174661992	9864	3	0	3	3	181270		100043757	174643534	174710832	+	inside	8595	8595	nearest	Zfp831
2	174894611	174909839	15229	2	2	3	5	181301		13616	174760619	174784042	+	downstream	133992	110569	nearest	Edn3
2	177312459	177327619	15161	6	1	4	2	181386	^	628308	177464733	177478129	+	upstream	-152274	137114	nearest	Zfp970
2	178481165	178488920	7756	4	1	2	1	181519		381409	178430531	178487366	+	overlapEnd	50634	1554	nearest	Cdh26
2	180265737	180277291	11555	4	3	2	1	181767		252966	180258540	180273496	-	overlapStart	7759	3795	nearest	Cables2
2	180858483	180870415	11933	2	4	2	1	181858		723951	180894040	180895220	+	upstream	-35557	23625	nearest	Mir124a-3
2	181916328	181922425	6098	5	4	3	6	182021	^	67005	181864337	181870830	+	downstream	51991	45498	nearest	Polr3k
2	181923338	181933504	10167	5	2	4	2	182022	^	672125	181991129	182003861	+	upstream	-67791	57625	nearest	Gm14496
3	3006966	3020004	13039	7	1	6	2	182036	^	30942	3508030	3658052	+	upstream	-501064	488026	nearest	Hnf4g
3	3022249	3026435	4187	1	2	3	2	182037	^	30942	3508030	3658052	+	upstream	-485781	481595	nearest	Hnf4g
3	4731220	4743692	12473	2	1	2	3	182262		100503859	4798708	4814911	+	upstream	-67488	55016	nearest	1110015O18Rik
3	5859338	5861790	2453	0	5	2	1	182398	^	19302	5560188	5576239	-	upstream	-283099	283099	nearest	Pex2
3	8244246	8248595	4350	1	2	4	7	182697	^	620966	8462228	8463035	-	downstream	218789	213633	nearest	Gm6194
3	9548391	9565017	16627	4	0	4	4	182866		170753	9427020	9610085	-	inside	61694	45068	nearest	Zfp704
3	9696496	9709012	12517	0	3	3	5	182888		170753	9427020	9610085	-	upstream	-86411	86411	nearest	Zfp704
3	10497671	10510603	12933	4	0	4	2	182987		74718	10417817	10440102	-	upstream	-57569	57569	nearest	Snx16
3	15586587	15596258	9672	3	1	3	2	183633	^	668101	15495751	15575065	-	upstream	-11522	11522	nearest	Sirpb1b
3	15866470	15875892	9423	8	1	0	0	183655	^	100038947	15795145	15848528	-	upstream	-17942	17942	nearest	Sirpb1c
3	16226658	16237761	11104	2	3	3	2	183701		229096	16183212	16217037	+	downstream	43446	9621	nearest	Ythdf3
3	16475970	16486700	10731	3	2	4	1	183737		229096	16183212	16217037	+	downstream	292758	258933	nearest	Ythdf3
3	18440293	18449197	8905	1	2	3	2	183969		73959	18468287	18480477	-	downstream	40184	19090	nearest	4930433B08Rik
3	18901702	18917846	16145	3	1	5	4	184022		74252	19131402	19163065	-	downstream	261363	213556	nearest	Armc1
3	19738078	19751326	13249	2	4	1	5	184129		12918	19693401	19695396	-	upstream	-42682	42682	nearest	Crh
3	27500118	27508557	8440	2	1	2	3	185106		100526525	27584900	27584995	-	downstream	84877	76343	nearest	Mir3092
3	27851558	27862615	11058	2	3	1	2	185154		208613	27866066	27896368	-	downstream	44810	3451	nearest	Tmem212
3	27968737	27979631	10895	3	1	1	3	185171		18805	27938695	28133362	+	inside	30042	30042	nearest	Pld1
3	28160579	28170539	9961	4	1	2	4	185193		665113	28263214	28675858	+	upstream	-102635	92675	nearest	Tnik
3	29918071	29927466	9396	2	2	2	2	185418		102636083	29891014	29924191	+	overlapEnd	27057	3275	nearest	Mannr
3	31203470	31215169	11700	4	2	1	4	185587		18417	31149920	31164324	+	downstream	53550	39146	nearest	Cldn11
3	33308134	33318391	10258	1	0	2	6	185869		58869	32949408	33143247	-	upstream	-164887	164887	nearest	Pex5l
3	33613236	33625686	12451	3	2	0	6	185910		67120	33799832	33814860	+	upstream	-186596	174146	nearest	Ttc14
3	33843204	33851868	8665	2	2	4	1	185938		51938	33812362	33844310	-	overlapStart	1106	1106	nearest	Ccdc39
3	44166459	44175243	8785	1	3	1	4	187270		72511	45280437	45378260	-	downstream	1211801	1105194	nearest	2610316D01Rik
3	50283055	50292730	9676	4	1	2	1	187972		26570	49892526	50443614	-	inside	160559	150884	nearest	Slc7a11
3	53105033	53115177	10145	1	0	2	5	188356		108927	53041528	53261679	+	inside	63505	63505	nearest	Lhfp
3	53894405	53911825	17421	0	4	4	3	188454		67890	53853376	53863830	-	upstream	-30575	30575	nearest	Ufm1
3	56574469	56578584	4116	5	6	2	2	188797	^	26422	55625195	56183701	-	upstream	-390768	390768	nearest	Nbea
3	62677612	62687703	10092	2	1	1	4	189573		229357	62529077	62605140	-	upstream	-72472	72472	nearest	Gpr149
3	69976723	69986623	9901	2	3	1	2	190526		229389	70007613	70028708	+	upstream	-30890	20990	nearest	Otol1
3	79248757	79261718	12962	1	1	3	3	191622		76089	79062516	79286517	-	inside	37760	24799	nearest	Rapgef2
3	79399019	79410659	11641	1	1	6	0	191645		100233207	79336661	79464129	+	inside	62358	53470	nearest	Gm17359
3	83224238	83233534	9297	3	1	1	3	192138		100038599	83125276	83129246	-	upstream	-94992	94992	nearest	Gm10710
3	83316037	83329290	13254	4	3	0	2	192152		100038599	83125276	83129246	-	upstream	-186791	186791	nearest	Gm10710
3	84471628	84481065	9438	2	2	1	3	192309		229474	84442198	84480429	-	overlapStart	8801	636	nearest	Fhdc1
3	85147601	85158608	11008	3	1	3	2	192400		73283	85317519	85332030	+	upstream	-169918	158911	nearest	1700036G14Rik
3	85349817	85366905	17089	2	3	7	2	192428		73283	85317519	85332030	+	downstream	32298	17787	nearest	1700036G14Rik
3	87571065	87582121	11057	2	0	1	5	192734		546801	87550099	87561109	+	downstream	20966	9956	nearest	Etv3l
3	88040543	88052821	12279	1	3	3	3	192797	^	66614	88043108	88055993	+	overlapStart	-2565	2565	nearest	Gpatch4
3	91887270	91898067	10798	3	4	3	0	193311	^	242100	92014583	92031582	+	upstream	-127313	116516	nearest	Pglyrp3
3	94980341	94989314	8974	3	2	3	1	193712		107650	94974731	95006843	+	inside	5610	5610	nearest	Pi4kb
3	97164672	97173591	8920	2	0	5	2	193989		66659	97158777	97176574	+	inside	5895	2983	nearest	Acp6
3	98308362	98319769	11408	3	2	3	1	194149		236539	98313170	98339990	-	overlapEnd	31628	4808	nearest	Phgdh
3	99977759	99983320	5562	2	1	3	2	194363		74362	99885406	100143322	+	inside	92353	92353	nearest	Spag17
3	101517637	101526139	8503	1	2	2	3	194571		11928	101576219	101604684	-	downstream	87047	50080	nearest	Atp1a1
3	105720444	105727883	7440	1	2	3	3	195118		109050	105704599	105720842	+	overlapEnd	15845	398	nearest	Inka2
3	107945886	107956127	10242	2	1	1	4	195432		14867	107938847	107943749	-	upstream	-2137	2137	nearest	Gstm6
3	116077479	116085966	8488	5	1	1	1	196378		22329	116109949	116129688	-	downstream	52209	23983	nearest	Vcam1
3	116970711	116979205	8495	1	2	2	3	196485		114301	116918258	116968987	-	upstream	-1724	1724	nearest	Palmd
3	117476155	117487436	11282	2	2	1	5	196552		75769	117574836	117689507	+	upstream	-98681	87400	nearest	Plppr5
3	122309373	122317793	8421	3	2	1	2	197162	^	29815	122294136	122530191	+	inside	15237	15237	nearest	Bcar3
3	122436244	122448285	12042	1	1	1	5	197177		102465764	122541625	122541681	-	downstream	105437	93340	nearest	Mir7657
3	128854580	128865540	10961	0	2	3	4	197970		18741	129199878	129219591	+	upstream	-345298	334338	nearest	Pitx2
3	128983523	128998428	14906	5	1	0	5	197989		18741	129199878	129219591	+	upstream	-216355	201450	nearest	Pitx2
3	130385819	130393723	7905	1	2	2	3	198176		71760	130617448	130637521	+	upstream	-231629	223725	nearest	Etnppl
3	131318204	131326687	8484	2	2	4	0	198294		71519	131288441	131303227	-	upstream	-14977	14977	nearest	Cyp2u1
3	135653286	135664595	11310	2	3	3	0	198837		18033	135584655	135691547	-	inside	38261	26952	nearest	Nfkb1
3	137199712	137210215	10504	1	2	4	1	199043		229861	137289639	137300708	+	upstream	-89927	79424	nearest	Gm567
3	138104695	138114657	9963	1	3	1	3	199152		17777	138089854	138143388	-	inside	38693	14841	nearest	Mttp
3	138308714	138322551	13838	3	2	4	3	199178		69117	138313286	138331134	+	overlapStart	-4572	4572	nearest	Adh6a
3	141459294	141472148	12855	2	0	4	4	199575		22253	141465216	141834924	+	overlapStart	-5922	5922	nearest	Unc5c
3	142220600	142231367	10768	1	2	1	4	199677		12167	141837136	142169425	-	upstream	-51175	51175	nearest	Bmpr1b
3	143988781	143998181	9401	2	3	2	4	199912		16911	144188530	144205220	-	downstream	216439	190349	nearest	Lmo4
3	144129951	144140775	10825	4	2	3	0	199930		16911	144188530	144205220	-	downstream	75269	47755	nearest	Lmo4
3	147826189	147835800	9612	3	3	2	0	200412		70892	146852367	146984009	+	downstream	973822	842180	nearest	Ttll7
3	151908479	151919605	11127	2	1	2	4	200918		19220	151796502	151837630	-	upstream	-70849	70849	nearest	Ptgfr
3	156820212	156827499	7288	1	2	5	0	201565		320840	156561794	157316445	+	inside	258418	258418	nearest	Negr1
4	3049000	3072637	23638	17	15	14	17	201957	^	100312470	3172083	3173003	+	upstream	-123083	99446	nearest	Vmn1r2
4	3075526	3087561	12036	12	9	13	10	201958	^	100312470	3172083	3173003	+	upstream	-96557	84522	nearest	Vmn1r2
4	3088849	3092125	3277	3	5	2	1	201959	^	100312470	3172083	3173003	+	upstream	-83234	79958	nearest	Vmn1r2
4	3143848	3150518	6671	2	2	1	3	201966	^	100312470	3172083	3173003	+	upstream	-28235	21565	nearest	Vmn1r2
4	3222242	3230734	8493	2	1	2	4	201975	^	100312471	3184348	3185358	-	upstream	-36884	36884	nearest	Vmn1r3
4	3234878	3242530	7653	2	1	4	2	201976	^	100312471	3184348	3185358	-	upstream	-49520	49520	nearest	Vmn1r3
4	5334601	5345836	11236	1	3	3	4	202244		73872	5632328	5642284	+	upstream	-297727	286492	nearest	4930423M02Rik
4	5928025	5937697	9673	3	1	1	3	202326		68053	6191098	6221688	+	upstream	-263073	253401	nearest	Ubxn2b
4	5998600	6012247	13648	1	1	2	5	202335		68053	6191098	6221688	+	upstream	-192498	178851	nearest	Ubxn2b
4	7108170	7120628	12459	1	2	3	2	202482		252838	6686353	6991557	-	upstream	-116613	116613	nearest	Tox
4	7234027	7247217	13191	1	3	3	2	202497		252838	6686353	6991557	-	upstream	-242470	242470	nearest	Tox
4	8607709	8620572	12864	0	1	4	5	202669		320790	8690406	8867659	+	upstream	-82697	69834	nearest	Chd7
4	10162517	10175881	13365	2	3	1	4	202867		74662	9915965	9917635	-	upstream	-244882	244882	nearest	4930448K20Rik
4	10343722	10358603	14882	1	4	1	3	202891		74662	9915965	9917635	-	upstream	-426087	426087	nearest	4930448K20Rik
4	12995870	13008440	12571	2	0	3	3	203241		208820	12906838	12983553	+	downstream	89032	12317	nearest	Triqk
4	14832939	14844317	11379	2	2	1	3	203482		72201	14809498	14826587	-	upstream	-6352	6352	nearest	Otud6b
4	15223809	15233730	9922	2	0	4	2	203521		100201	15265831	15286753	+	upstream	-42022	32101	nearest	Tmem64
4	17845671	17854519	8849	2	1	4	3	203828		17389	17852893	18119145	+	overlapStart	-7222	1626	nearest	Mmp16
4	29232448	29242887	10440	4	2	1	1	205231		102634169	29068079	29088811	+	downstream	164369	143637	nearest	Gm11917
4	30428972	30441041	12070	1	2	3	3	205371		102634169	29068079	29088811	+	downstream	1360893	1340161	nearest	Gm11917
4	31736938	31744896	7959	1	2	3	2	205520		26409	31964097	32023467	+	upstream	-227159	219201	nearest	Map3k7
4	33455569	33465595	10027	2	1	2	4	205725		102465904	33438081	33438209	+	downstream	17488	17360	nearest	Mir8118
4	36541953	36553498	11546	3	1	3	1	206117		100124458	36645373	36645453	-	downstream	103500	91875	nearest	Mir876
4	40074879	40083737	8859	1	4	1	2	206549		11428	40143081	40198338	+	upstream	-68202	59344	nearest	Aco1
4	40458195	40468108	9914	2	0	4	2	206602		320500	40472180	40477168	+	upstream	-13985	4072	nearest	Tmem215
4	40494974	40503496	8523	1	0	3	5	206607		71293	40482840	40525548	-	inside	30574	12134	nearest	4933428C19Rik
4	41549145	41556645	7501	2	0	2	4	206747		71901	41517691	41569538	-	inside	20393	12893	nearest	Fam219a
4	41741370	41753642	12273	2	2	1	3	206774		14430	41755228	41758695	+	upstream	-13858	1586	nearest	Galt
4	43859911	43873693	13783	3	1	3	1	206933		53614	43875530	43944806	+	upstream	-15619	1837	nearest	Reck
4	44159442	44171576	12135	4	2	2	1	206978		100628618	44221195	44221267	-	downstream	61825	49619	nearest	Mir5106
4	47224754	47238485	13732	2	1	4	2	207390		12819	47208161	47313167	+	inside	16593	16593	nearest	Col15a1
4	52450796	52460408	9613	1	1	4	2	208067		14211	52439243	52488260	+	inside	11553	11553	nearest	Smc2
4	56538366	56551704	13339	6	0	3	1	208607		11471	56740005	56741443	-	downstream	203077	188301	nearest	Actl7b
4	56595547	56603587	8041	2	1	2	3	208614		11471	56740005	56741443	-	downstream	145896	136418	nearest	Actl7b
4	58689834	58699742	9909	1	0	5	2	208909		258922	58784779	58785722	-	downstream	95888	85037	nearest	Olfr267
4	59379089	59390352	11264	3	1	0	4	209000		634731	59314683	59438633	-	inside	59544	48281	nearest	Susd1
4	59994382	60008120	13739	3	2	3	2	209081		620807	59964294	60007274	+	overlapEnd	30088	846	nearest	Mup6
4	61799201	61810855	11655	0	3	3	4	209246		100048885	61516520	61782269	-	upstream	-16932	16932	nearest	NA
4	62197025	62210239	13215	2	4	2	0	209300		22696	62189540	62208446	-	overlapStart	11421	1793	nearest	Zfp37
4	68268286	68275649	7364	2	1	1	4	210112		102633975	68312657	68321961	-	downstream	53675	37008	nearest	Gm12911
4	79301161	79307592	6432	3	1	2	3	211464		19266	75941238	78211961	-	upstream	-1089200	1089200	nearest	Ptprd
4	84220365	84228673	8309	4	1	2	1	212098		78238	84042039	84044879	-	upstream	-175486	175486	nearest	6030471H07Rik
4	85782933	85793785	10853	1	2	2	3	212317		77739	85514172	86428385	+	inside	268761	268761	nearest	Adamtsl1
4	91221149	91231949	10801	3	3	4	0	213022		102466157	91373284	91373363	-	downstream	152214	141335	nearest	Mir6402
4	94253488	94266774	13287	0	3	3	3	213389		67770	94500081	94556796	-	downstream	303308	233307	nearest	Caap1
4	104951720	104963219	11500	2	2	2	2	214766		242594	104913456	105016863	+	inside	38264	38264	nearest	Fyb2
4	106137902	106151046	13145	2	1	3	3	214934		105244641	106241216	106290026	+	upstream	-103314	90170	nearest	Gm12724
4	107414101	107423337	9237	2	3	2	1	215107		230587	107434591	107635061	+	upstream	-20490	11254	nearest	Glis1
4	107476906	107490923	14018	4	0	1	4	215117		230587	107434591	107635061	+	inside	42315	42315	nearest	Glis1
4	109830725	109838579	7855	1	1	2	5	215418		242620	109978053	109983687	+	upstream	-147328	139474	nearest	Dmrta2
4	112202321	112217193	14873	4	2	4	1	215712		195564	112232245	112300468	+	upstream	-29924	15052	nearest	Skint3
4	114836582	114848591	12010	4	1	0	4	216061		433746	114821722	114856166	+	inside	14860	7575	nearest	Gm12830
4	116714133	116727558	13426	2	1	3	2	216322		230661	116712723	116805956	+	inside	1410	1410	nearest	Tesk2
4	117374138	117381952	7815	1	1	3	3	216404		66743	117271463	117497052	-	inside	122914	102675	nearest	Rnf220
4	118546216	118554918	8703	3	4	5	6	216553	^	230678	118540941	118544044	-	upstream	-2172	2172	nearest	Tmem125
4	123220205	123233618	13414	1	0	3	4	217129		56198	123233556	123249875	+	overlapStart	-13351	62	nearest	Heyl
4	131749640	131760499	10860	3	2	4	5	218269		19273	131768457	131838288	-	downstream	88648	7958	nearest	Ptpru
4	132167593	132176851	9259	2	2	1	3	218327		18386	132110726	132144486	-	upstream	-23107	23107	nearest	Oprd1
4	133252120	133261642	9523	3	2	1	2	218466		269589	133253090	133263113	-	overlapEnd	10993	970	nearest	Sytl1
4	135706582	135713508	6927	2	1	4	1	218796		230828	135728172	135752140	+	upstream	-21590	14664	nearest	Il22ra1
4	136538435	136551420	12986	3	2	3	4	218905		99982	136550540	136602723	-	overlapEnd	64288	880	nearest	Kdm1a
4	138414131	138425406	11276	0	2	4	2	219146		68350	138434671	138442265	+	upstream	-20540	9265	nearest	Mul1
4	139677731	139688099	10369	5	1	0	2	seq_219331		83770	139653538	139670280	+	downstream	24193	7451	nearest	Tas1r2
4	141458249	141468461	10213	2	1	1	5	seq_219559		22642	141444654	141467930	+	overlapEnd	13595	531	nearest	Zbtb17
4	145665390	145681680	16291	3	3	0	7	seq_220146	^	100041379	145670685	145704441	+	overlapStart	-5295	5295	nearest	Zfp980
4	145683030	145692929	9900	0	3	1	8	seq_220147	^	100041379	145670685	145704441	+	inside	12345	11512	nearest	Zfp980
4	146160941	146176063	15123	8	4	5	4	seq_220188	^	667666	146156824	146198755	+	inside	4117	4117	nearest	Zfp600
4	146450970	146463875	12906	8	2	1	1	seq_220205	^	433791	146449023	146470292	+	inside	1947	1947	nearest	Zfp992
4	146474017	146503055	29039	16	11	18	17	seq_220208	^	100041433	146502027	146539395	+	overlapStart	-28010	1028	nearest	Zfp981
4	146722091	146740151	18061	5	2	4	9	seq_220226	^	67524	146519039	146546873	-	upstream	-175218	175218	nearest	1700095A21Rik
4	146965386	146976336	10951	4	0	3	1	seq_220236	^	100043034	147021850	147060794	+	upstream	-56464	45514	nearest	Rex2
4	147089581	147099281	9701	1	4	3	2	seq_220244	^	71270	147063366	147068436	-	upstream	-21145	21145	nearest	4933438K21Rik
4	147121594	147134515	12922	8	5	4	7	seq_220249	^	71270	147063366	147068436	-	upstream	-53158	53158	nearest	4933438K21Rik
4	147188549	147197642	9094	3	1	2	5	seq_220257	^	71270	147063366	147068436	-	upstream	-120113	120113	nearest	4933438K21Rik
4	147225702	147251610	25909	7	2	10	8	seq_220264	^	71270	147063366	147068436	-	upstream	-157266	157266	nearest	4933438K21Rik
4	147265358	147279221	13864	2	8	3	2	seq_220268	^	71270	147063366	147068436	-	upstream	-196922	196922	nearest	4933438K21Rik
4	147283146	147297671	14526	7	4	7	3	seq_220270	^	195531	147492417	147513486	+	upstream	-209271	194746	nearest	Zfp982
4	147334120	147355606	21487	6	7	11	13	seq_220276	^	195531	147492417	147513486	+	upstream	-158297	136811	nearest	Zfp982
4	147387192	147393924	6733	2	3	2	3	seq_220280	^	195531	147492417	147513486	+	upstream	-105225	98493	nearest	Zfp982
4	147394682	147405586	10905	5	5	9	6	seq_220281	^	195531	147492417	147513486	+	upstream	-97735	86831	nearest	Zfp982
4	147411950	147435370	23421	13	16	14	14	seq_220283	^	195531	147492417	147513486	+	upstream	-80467	57047	nearest	Zfp982
4	147435677	147448514	12838	6	3	3	2	seq_220284	^	195531	147492417	147513486	+	upstream	-56740	43903	nearest	Zfp982
4	147456267	147471434	15168	4	5	1	2	seq_220287	^	195531	147492417	147513486	+	upstream	-36150	20983	nearest	Zfp982
4	147496514	147504702	8189	3	1	3	1	seq_220293	^	195531	147492417	147513486	+	inside	4097	4097	nearest	Zfp982
4	147518141	147531153	13013	0	2	7	6	seq_220296	^	433804	147553277	147585198	+	upstream	-35136	22124	nearest	Zfp985
4	147555195	147564275	9081	5	2	3	3	seq_220299	^	433804	147553277	147585198	+	inside	1918	1918	nearest	Zfp985
4	147730965	147746176	15212	3	2	1	10	seq_220323	^	100503584	147673502	147702553	-	upstream	-28412	28412	nearest	Zfp534
4	147765120	147775897	10778	2	0	3	3	seq_220326	^	100041677	147753974	147809840	-	inside	44720	11146	nearest	Zfp984
4	147794228	147804600	10373	5	1	0	2	seq_220330	^	100041677	147753974	147809840	-	inside	15612	5240	nearest	Zfp984
4	148056988	148068022	11035	3	1	3	2	seq_220368	^	17769	148039077	148059551	+	overlapEnd	17911	2563	nearest	Mthfr
4	149811391	149822840	11450	2	1	2	6	seq_220599	^	70556	149744036	149774277	-	upstream	-37114	37114	nearest	Slc25a33
4	149928926	149938034	9109	2	1	1	4	seq_220611		74646	149896283	149955043	-	inside	26117	17009	nearest	Spsb1
4	150748195	150761728	13534	3	0	2	6	seq_220721		74155	150853919	150868892	+	upstream	-105724	92191	nearest	Errfi1
4	151114330	151126837	12508	2	0	4	3	seq_220774		105704528	151089570	151091449	+	downstream	24760	22881	nearest	Gm13090
4	151758278	151771101	12824	1	0	3	5	seq_220866		100072	150917322	151861876	-	inside	103598	90775	nearest	Camta1
4	151960929	151972238	11310	3	4	2	3	seq_220895		69876	151982639	151988997	-	downstream	28068	10401	nearest	Thap3
4	152572764	152579573	6810	3	2	2	1	seq_220991		16498	152390742	152477910	-	upstream	-94854	94854	nearest	Kcnab2
4	152837303	152845433	8131	3	0	2	3	seq_221029		330004	152697540	152700515	+	downstream	139763	136788	nearest	Gm833
4	153856381	153868339	11959	1	0	4	3	seq_221179		407793	153947633	153950503	-	downstream	94122	79294	nearest	BC039966
4	153902974	153913918	10945	1	3	2	2	seq_221184		407793	153947633	153950503	-	downstream	47529	33715	nearest	BC039966
4	154887248	154896735	9488	1	4	2	2	seq_221335		66469	154895504	154899135	-	overlapEnd	11887	1231	nearest	Prxl2b
4	155261281	155270024	8744	1	0	4	3	seq_221380		67513	155249802	155256687	+	downstream	11479	4594	nearest	Faap20
4	156339582	156344510	4929	0	4	3	1	seq_221519	^	22300	156331135	156339496	+	downstream	8447	86	nearest	Vmn2r123
4	156355804	156358614	2811	5	0	2	5	seq_221520	^	22300	156331135	156339496	+	downstream	24669	16308	nearest	Vmn2r123
5	5173711	5179794	6084	1	2	4	1	seq_221821		18647	4803391	5420312	-	inside	246601	240518	nearest	Cdk14
5	5314519	5326291	11773	1	4	2	1	seq_221839		18647	4803391	5420312	-	inside	105793	94021	nearest	Cdk14
5	10248478	10260315	11838	3	3	2	1	seq_222469		108069	9485541	9725170	-	upstream	-523308	523308	nearest	Grm3
5	14901781	14909545	7765	2	3	3	3	seq_222998	^	381714	14910122	14914899	-	downstream	13118	577	nearest	Gm9758
5	14909681	14922900	13220	5	6	8	3	seq_222999	^	381714	14910122	14914899	-	includeFeature	5218	441	nearest	Gm9758
5	14930472	14937212	6741	1	0	2	5	seq_223001	^	624245	14933221	14938429	-	overlapEnd	7957	1217	nearest	Speer4e
5	14937504	14947722	10219	6	2	5	6	seq_223002	^	624245	14933221	14938429	-	overlapStart	925	925	nearest	Speer4e
5	14951335	14965112	13778	11	6	5	11	seq_223004	^	624245	14933221	14938429	-	upstream	-12906	12906	nearest	Speer4e
5	14967059	14977280	10222	5	3	1	5	seq_223005	^	100503549	14974113	14978935	-	overlapEnd	11876	1655	nearest	Gm10354
5	14977837	14986499	8663	4	1	3	5	seq_223006	^	100503549	14974113	14978935	-	overlapStart	1098	1098	nearest	Gm10354
5	14986667	15047578	60912	28	35	27	33	seq_223007	^	66773	15028950	15032998	-	includeFeature	46331	14580	nearest	Gm17019
5	15050425	15063068	12644	7	4	7	7	seq_223008	^	66773	15028950	15032998	-	upstream	-17427	17427	nearest	Gm17019
5	15457434	15490469	33036	15	20	19	24	seq_223009	^	100861755	15524456	15529222	-	downstream	71788	33987	nearest	Gm21190
5	15502339	15524938	22600	7	7	11	10	seq_223012	^	100861755	15524456	15529222	-	overlapEnd	26883	482	nearest	Gm21190
5	15525151	15534996	9846	1	4	8	3	seq_223013	^	100861755	15524456	15529222	-	overlapStart	4071	695	nearest	Gm21190
5	15550138	15559373	9236	3	4	4	5	seq_223017	^	105242399	15577333	15582078	+	upstream	-27195	17960	nearest	Gm21083
5	15564760	15587167	22408	8	10	7	4	seq_223019	^	105242399	15577333	15582078	+	includeFeature	-12573	5089	nearest	Gm21083
5	15588729	15600681	11953	5	4	6	4	seq_223020	^	105242399	15577333	15582078	+	downstream	11396	6651	nearest	Gm21083
5	15604613	15610247	5635	1	3	2	4	seq_223022	^	360220	15619064	15623864	+	upstream	-14451	8817	nearest	Speer4d
5	15628054	15633572	5519	1	4	2	2	seq_223026	^	360220	15619064	15623864	+	downstream	8990	4190	nearest	Speer4d
5	15635886	15647338	11453	6	5	2	7	seq_223027	^	381715	15652286	15657059	-	downstream	21173	4948	nearest	4930572O03Rik
5	15649998	15656481	6484	5	3	1	0	seq_223028	^	381715	15652286	15657059	-	overlapEnd	7061	578	nearest	4930572O03Rik
5	15668249	15698658	30410	24	17	19	15	seq_223031	^	75858	15680710	15714596	+	overlapStart	-12461	12461	nearest	Speer4cos
5	15698959	15704822	5864	2	1	4	1	seq_223032	^	100502967	15709501	15714271	-	downstream	15312	4679	nearest	Speer4c
5	15704942	15716744	11803	10	5	10	5	seq_223033	^	100502967	15709501	15714271	-	includeFeature	9329	2473	nearest	Speer4c
5	21815863	21832740	16878	1	2	4	4	seq_223797		19181	21785283	21803787	+	downstream	30580	12076	nearest	Psmc2
5	21964873	21976687	11815	2	2	1	4	seq_223818		80979	21810655	21865604	-	upstream	-99269	99269	nearest	Slc26a5
5	22967752	22981966	14215	1	2	3	3	seq_223941		330052	22738910	22746887	-	upstream	-220865	220865	nearest	A930003O13Rik
5	25938387	25949714	11328	3	2	3	1	seq_224318		100862359	25948253	25954417	-	overlapEnd	16030	1461	nearest	Gm21671
5	26041500	26059367	17868	0	6	1	3	seq_224335		75657	26032846	26039558	-	upstream	-1942	1942	nearest	Speer4a
5	27074789	27084266	9478	0	1	3	4	seq_224479		13483	26817203	27727505	+	inside	257586	257586	nearest	Dpp6
5	29303436	29321085	17650	3	1	4	3	seq_224790		56873	29229802	29378390	-	inside	74954	57305	nearest	Lmbr1
5	29656066	29664114	8049	0	2	3	3	seq_224838		23950	29735688	29818134	+	upstream	-79622	71574	nearest	Dnajb6
5	29975042	29984943	9902	1	5	2	1	seq_224887		16193	30013114	30019981	+	upstream	-38072	28171	nearest	Il6
5	30120756	30128362	7607	1	3	0	4	seq_224909		433868	30103584	30106086	-	upstream	-14670	14670	nearest	3110082J24Rik
5	31403296	31411559	8264	3	1	2	2	seq_225085		269639	31452431	31481754	+	upstream	-49135	40872	nearest	Zfp512
5	31625759	31640979	15221	2	2	2	3	seq_225120		102466677	31667231	31667340	-	downstream	41581	26252	nearest	Mir3473e
5	32046194	32056115	9922	1	1	3	3	seq_225172		14284	32135801	32157842	+	upstream	-89607	79686	nearest	Fosl2
5	34642234	34650068	7835	3	1	1	3	seq_225504		68294	34633642	34637212	-	upstream	-5022	5022	nearest	Mfsd10
5	35879868	35890359	10492	3	0	5	0	seq_225680		70292	35893319	36003923	+	upstream	-13451	2960	nearest	Afap1
5	36629184	36631782	2599	4	2	1	1	seq_225789	^	100855	36490604	36593276	-	upstream	-35908	35908	nearest	Tbc1d14
5	37122774	37133232	10459	4	2	3	1	seq_225866		381634	37085370	37229547	+	inside	37404	37404	nearest	Gm1043
5	42719793	42730152	10360	1	1	3	3	seq_226606		231207	43233170	43289724	+	upstream	-513377	503018	nearest	Cpeb2
5	44877329	44885864	8536	1	2	2	3	seq_226897		16826	44472132	44799680	-	upstream	-77649	77649	nearest	Ldb2
5	46092990	46102764	9775	2	3	3	1	seq_227060		78106	45926818	45932409	-	upstream	-160581	160581	nearest	4930405L22Rik
5	50725433	50732723	7291	5	1	2	0	seq_227624		102465903	50252762	50252868	+	downstream	472671	472565	nearest	Mir8117
5	66484130	66494090	9961	5	1	2	1	seq_229601		11787	66298703	66618784	-	inside	134654	124694	nearest	Apbb2
5	66937670	66949230	11561	1	3	1	3	seq_229659		18935	67094399	67099301	-	downstream	161631	145169	nearest	Phox2b
5	67184295	67199156	14862	1	0	3	5	seq_229689		67878	67260565	67291461	+	upstream	-76270	61409	nearest	Tmem33
5	72898293	72909117	10825	1	3	1	4	seq_230394		75991	72914304	72978829	+	upstream	-16011	5187	nearest	Slain2
5	75345618	75356420	10803	5	0	0	4	seq_230704		102465620	75176831	75176904	+	downstream	168787	168714	nearest	Mir7025
5	75372238	75381202	8965	1	1	2	4	seq_230707		16590	75574916	75656722	+	upstream	-202678	193714	nearest	Kit
5	75690799	75697330	6532	3	2	1	2	seq_230751		16590	75574916	75656722	+	downstream	115883	34077	nearest	Kit
5	76957131	76967124	9994	3	0	2	3	seq_230920		231327	76913249	76951578	-	upstream	-5553	5553	nearest	Ppat
5	87221339	87229804	8466	1	2	2	3	seq_232135		112417	87240493	87254804	-	downstream	33465	10689	nearest	Ugt2b37
5	88057369	88065055	7687	0	1	4	3	seq_232233		20600	88086556	88109053	+	upstream	-29187	21501	nearest	Smr2
5	97791171	97799009	7839	1	1	4	2	seq_233384		71914	97882783	98031043	-	downstream	239872	83774	nearest	Antxr2
5	97836240	97850734	14495	2	1	6	3	seq_233387		71914	97882783	98031043	-	downstream	194803	32049	nearest	Antxr2
5	98103004	98111656	8653	1	2	3	2	seq_233424		77630	98167198	98188991	+	upstream	-64194	55542	nearest	Prdm8
5	102307443	102317555	10113	1	2	2	3	seq_233980		231532	102481391	102897937	+	upstream	-173948	163836	nearest	Arhgap24
5	102494435	102504207	9773	1	2	3	2	seq_234003		231532	102481391	102897937	+	inside	13044	13044	nearest	Arhgap24
5	105007220	105014591	7372	1	2	4	1	seq_234330		27405	104935057	104982718	-	upstream	-24502	24502	nearest	Abcg3
5	106320627	106332164	11538	4	0	1	3	seq_234499		102635633	106321340	106323217	+	includeFeature	-713	713	nearest	Gm32921
5	107612662	107622652	9991	4	0	2	3	seq_234671		78443	107630250	107633850	-	downstream	21188	7598	nearest	A930041C12Rik
5	107806381	107815821	9441	1	2	4	2	seq_234696		73318	107830099	107831776	+	upstream	-23718	14278	nearest	Ube2d2b
5	108603301	108616011	12711	2	1	3	3	seq_234799		231580	108569411	108629755	-	inside	26454	13744	nearest	Gak
5	111989357	112000189	10833	2	2	2	2	seq_235269		75569	112206763	112210004	+	upstream	-217406	206574	nearest	1700028D13Rik
5	114921448	114925792	4345	2	2	2	4	seq_235656	^	231655	114923240	114937915	+	overlapStart	-1792	1792	nearest	Oasl1
5	116085645	116093659	8015	3	1	1	3	seq_235827		545798	116038755	116083244	-	upstream	-2401	2401	nearest	Tmem233
5	116717259	116726101	8843	0	3	2	3	seq_235907		68955	116439275	116591817	-	upstream	-125442	125442	nearest	Srrm4
5	117104229	117115931	11703	0	5	3	0	seq_235960		71954	117091680	117116113	-	inside	11884	182	nearest	Suds3
5	117204553	117213683	9131	1	2	5	0	seq_235973		23980	117282654	117287625	-	downstream	83072	68971	nearest	Pebp1
5	118223882	118233596	9715	2	4	1	1	seq_236118		269695	118190736	118245116	-	inside	21234	11520	nearest	Rnft2
5	119884953	119896486	11534	1	3	1	3	seq_236344		21388	119832668	119885219	+	overlapEnd	52285	266	nearest	Tbx5
5	121133737	121147777	14041	3	1	4	3	seq_236512		19247	121130533	121191397	-	inside	57660	3204	nearest	Ptpn11
5	125911460	125917905	6446	2	3	2	1	seq_237143		208151	125531774	125792583	+	downstream	379686	118877	nearest	Tmem132b
5	128049551	128059140	9590	2	1	3	2	seq_237434		243274	127781630	128433077	-	inside	383526	267921	nearest	Tmem132d
5	128560007	128574677	14671	1	2	3	5	seq_237509		319616	128579106	128600693	-	downstream	40686	4429	nearest	Fzd10os
5	128708864	128726248	17385	2	4	2	4	seq_237525		57749	128702524	128755474	+	inside	6340	6340	nearest	Piwil1
5	128899087	128908636	9550	1	3	2	2	seq_237543		231760	128757791	128953486	-	inside	54399	44850	nearest	Rimbp2
5	129326392	129334699	8308	3	1	3	1	seq_237599		231769	129501221	129571384	+	upstream	-174829	166522	nearest	Sfswap
5	129957468	129967504	10037	1	3	1	3	seq_237678		69568	129941970	129986692	+	inside	15498	15498	nearest	Vkorc1l1
5	132721017	132730944	9928	3	4	1	1	seq_238081		319974	131437333	132543344	-	upstream	-177673	177673	nearest	Auts2
5	133234397	133246090	11694	1	3	3	1	seq_238155		319974	131437333	132543344	-	upstream	-691053	691053	nearest	Auts2
5	135397100	135411054	13955	2	2	1	4	seq_238462		107939	135376141	135394546	-	upstream	-2554	2554	nearest	Pom121
5	136977747	136985415	7669	1	2	2	4	seq_238668		26433	136987019	136996648	+	upstream	-9272	1604	nearest	Plod3
5	137147256	137154413	7158	0	0	5	5	seq_238686	^	666339	137134922	137166070	-	inside	18814	11657	nearest	Muc3
5	137291284	137303179	11896	2	0	4	2	seq_238699		102466887	137293780	137293876	+	includeFeature	-2496	2496	nearest	Mir8116
5	139743348	139751982	8635	3	2	1	2	seq_239022		231830	139706696	139736336	-	upstream	-7012	7012	nearest	Micall2
5	140028972	140043522	14551	2	3	1	7	seq_239060		243312	139907943	139974722	+	downstream	121029	54250	nearest	Elfn1
5	141733258	141741267	8010	2	2	2	3	seq_239300		330222	141241490	142215586	+	inside	491768	474319	nearest	Sdk1
5	142224196	142233665	9470	3	0	3	2	seq_239371		17425	142401497	142462011	+	upstream	-177301	167832	nearest	Foxk1
5	142433298	142442453	9156	1	3	3	3	seq_239394		231855	142463944	142478710	+	upstream	-30646	21491	nearest	Ap5z1
5	143455077	143468094	13018	1	2	4	2	seq_239540		231871	143464584	143505942	+	overlapStart	-9507	3510	nearest	Daglb
5	145663974	145672153	8180	2	2	2	3	seq_239826		53973	145694049	145720136	-	downstream	56162	21896	nearest	Cyp3a41a
5	145924379	145942911	18533	5	2	4	5	seq_239874		13112	145854426	145879964	-	upstream	-44415	44415	nearest	Cyp3a11
5	149145810	149157953	12144	2	4	0	6	seq_240284		667410	149155439	149156209	-	includeFeature	10399	1744	nearest	Gm8615
5	149577160	149593935	16776	4	0	1	6	seq_240349		100415916	149489056	149538030	-	upstream	-39130	39130	nearest	Gm15997
6	9040989	9054815	13827	1	0	6	2	seq_241408		18231	8948431	9249032	+	inside	92558	92558	nearest	Nxph1
6	17252305	17265831	13527	1	3	3	4	seq_242406		12390	17281185	17289115	+	upstream	-28880	15354	nearest	Cav2
6	18517348	18526483	9136	1	2	3	4	seq_242559		30785	18366478	18514843	-	upstream	-2505	2505	nearest	Cttnbp2
6	24733270	24745758	12489	3	2	0	3	seq_243290		74409	24733245	24745452	+	overlapEnd	25	25	nearest	Hyal6
6	28847163	28855306	8144	2	5	0	3	seq_243828		192198	28828133	28831747	-	upstream	-15416	15416	nearest	Lrrc4
6	29746162	29750701	4540	8	4	10	11	seq_243943	^	319757	29735694	29761365	+	inside	10468	10468	nearest	Smo
6	31584756	31597231	12476	4	0	1	4	seq_244174	^	105242621	31574967	31576723	+	downstream	9789	8033	nearest	Gm6117
6	34482653	34492035	9383	3	3	1	1	seq_244562		12183	34476207	34505613	+	inside	6446	6446	nearest	Bpgm
6	34879928	34889078	9151	5	1	2	2	seq_244610		78412	34871771	34878060	-	upstream	-1868	1868	nearest	Cyren
6	36843542	36852525	8984	1	0	6	1	seq_244873		19242	36714929	36810220	-	upstream	-33322	33322	nearest	Ptn
6	37197560	37211301	13742	1	2	5	3	seq_244919		320127	36846022	37300184	-	inside	102624	88883	nearest	Dgki
6	37503654	37514960	11307	2	2	1	3	seq_244961		208665	37530173	37568815	+	upstream	-26519	15213	nearest	Akr1d1
6	38764346	38774961	10616	0	1	3	4	seq_245115		21391	38875404	39084585	+	upstream	-111058	100443	nearest	Tbxas1
6	41229811	41242446	12636	2	1	3	2	seq_245433		22074	41302269	41305532	+	upstream	-72458	59823	nearest	Try4
6	53605407	53615182	9776	4	1	2	2	seq_247034		66873	53815468	53820830	-	downstream	215423	200286	nearest	Tril
6	54995001	55007944	12944	3	2	4	1	seq_247224		110175	54982580	54992950	-	upstream	-2051	2051	nearest	Ggct
6	56582691	56598671	15981	1	2	3	3	seq_247439		18575	56069804	56652487	-	inside	69796	53816	nearest	Pde1c
6	57773994	57783599	9606	4	1	0	3	seq_247601		232023	57727807	57825159	-	inside	51165	41560	nearest	Vopp1
6	68000662	68010737	10076	0	2	4	2	seq_248858		75070	67565191	67566446	-	upstream	-434216	434216	nearest	4930515G16Rik
6	70202712	70216638	13927	5	2	0	3	seq_249137	^	19895	70765720	70792232	-	downstream	589520	549082	nearest	Rpia
6	71374819	71383432	8614	3	0	2	3	seq_249301		12525	71373427	71379173	+	overlapEnd	1392	1392	nearest	Cd8a
6	71475326	71483430	8105	0	3	1	4	seq_249313		22644	71493894	71510881	+	upstream	-18568	10464	nearest	Rnf103
6	71728920	71736629	7710	2	2	3	1	seq_249343		52250	71707561	71810710	+	inside	21359	21359	nearest	Reep1
6	72646553	72653865	7313	4	1	3	0	seq_249476		100038714	72629288	72637717	+	downstream	17265	8836	nearest	Gm15401
6	72767668	72780282	12615	2	4	2	3	seq_249494		21415	72626378	72789254	-	inside	21586	8972	nearest	Tcf7l1
6	73260745	73276420	15676	1	3	1	4	seq_249559		56451	73248382	73276911	+	inside	12363	491	nearest	Suclg1
6	73896853	73906479	9627	1	2	3	3	seq_249635		102634075	73586109	73608673	-	upstream	-288180	288180	nearest	Gm31747
6	77000787	77012067	11281	2	2	2	4	seq_250007		74342	77242689	77257791	+	upstream	-241902	230622	nearest	Lrrtm1
6	77509184	77529560	20377	4	0	6	6	seq_250074		70753	77380260	77382459	-	upstream	-126725	126725	nearest	6330415B21Rik
6	77605413	77615763	10351	4	1	3	3	seq_250086		70753	77380260	77382459	-	upstream	-222954	222954	nearest	6330415B21Rik
6	84301151	84309709	8559	3	0	5	0	seq_250930		100038556	84412942	84423838	-	downstream	122687	103233	nearest	Gm10445
6	85822292	85830070	7779	3	2	0	4	seq_251135		69049	85817218	85820972	-	upstream	-1320	1320	nearest	Nat8f5
6	88949019	88962147	13129	4	3	4	3	seq_251562		232217	88950683	89110031	+	overlapStart	-1664	1664	nearest	4933427D06Rik
6	89135386	89145184	9799	4	2	2	0	seq_251589		434065	89140994	89147388	+	overlapStart	-5608	2204	nearest	Gm1965
6	89436522	89451860	15339	3	1	3	4	seq_251631		18844	89316314	89362620	-	upstream	-73902	73902	nearest	Plxna1
6	89475990	89490867	14878	1	3	5	4	seq_251634		66098	89383146	89595652	-	inside	119662	92844	nearest	Chchd6
6	89906444	89915940	9497	0	2	1	6	seq_251696		113854	89893177	89894284	+	downstream	13267	12160	nearest	Vmn1r44
6	90455218	90466620	11403	2	1	3	2	seq_251768		66277	90462576	90475238	+	overlapStart	-7358	4044	nearest	Klf15
6	90690824	90700677	9854	1	1	1	5	seq_251797		71699	90604725	90646412	+	downstream	86099	44412	nearest	Slc41a3
6	93256172	93265676	9505	1	1	3	3	seq_252173		101401	92772699	92943492	-	upstream	-312680	312680	nearest	Adamts9
6	95243063	95260117	17055	2	4	3	4	seq_252426		414067	95255726	95333993	-	overlapEnd	90930	4391	nearest	AY512915
6	96232190	96241443	9254	5	1	3	0	seq_252565		78482	96164497	96166243	-	upstream	-65947	65947	nearest	1700123L14Rik
6	98237736	98259669	21934	3	5	3	8	seq_252837		330390	98235708	98342754	-	inside	105018	2028	nearest	Gm765
6	98539764	98554466	14703	2	1	3	2	seq_252871		330390	98235708	98342754	-	upstream	-197010	197010	nearest	Gm765
6	99963650	99971591	7942	2	0	1	5	seq_253069		50501	99711299	99726392	-	upstream	-237258	237258	nearest	Prok2
6	100168174	100177248	9075	3	3	1	1	seq_253099		56353	100228565	100287485	-	downstream	119311	51317	nearest	Rybp
6	100983886	100994352	10467	3	3	1	1	seq_253216		232314	100833622	100869934	+	downstream	150264	113952	nearest	Ppp4r2
6	101027482	101040026	12545	3	3	1	3	seq_253222		232314	100833622	100869934	+	downstream	193860	157548	nearest	Ppp4r2
6	102481071	102490490	9420	1	6	1	2	seq_253414	^	18488	102163304	102573101	-	inside	92030	82611	nearest	Cntn3
6	103312843	103317412	4570	1	3	3	1	seq_253528	^	12661	103510586	103750211	+	upstream	-197743	193174	nearest	Chl1
6	103648040	103650294	2255	316	253	343	332	seq_253574	^	12661	103510586	103750211	+	inside	137454	99917	nearest	Chl1
6	109485974	109496017	10044	2	0	1	5	seq_254311		192193	108828641	108859356	+	downstream	657333	626618	nearest	Edem1
6	111577631	111586355	8725	1	3	3	2	seq_254577		67336	112210708	112212519	+	upstream	-633077	624353	nearest	1700054K19Rik
6	112574314	112584693	10380	2	2	4	0	seq_254718		18430	112473683	112489943	-	upstream	-84371	84371	nearest	Oxtr
6	114180233	114192438	12206	3	4	4	1	seq_254946		243616	114131241	114249952	+	inside	48992	48992	nearest	Slc6a11
6	114260065	114271689	11625	2	2	1	3	seq_254954		232333	114282635	114317532	+	upstream	-22570	10946	nearest	Slc6a1
6	118377764	118388106	10343	2	0	3	4	seq_255528		213895	118383381	118419474	-	overlapEnd	41710	4725	nearest	Bms1
6	118890867	118904196	13330	3	1	2	2	seq_255597		319618	119175253	119221616	+	upstream	-284386	271057	nearest	Dcp1b
6	119308050	119319617	11568	2	1	1	6	seq_255653		211187	119315133	119330766	-	overlapEnd	22716	4484	nearest	Lrtm2
6	125697420	125708629	11210	2	3	2	1	seq_256482		243634	125690419	126040126	+	inside	7001	7001	nearest	Ano2
6	125958631	125971436	12806	3	2	1	6	seq_256521		18205	126101412	126166910	-	downstream	208279	129976	nearest	Ntf3
6	126323108	126332265	9158	2	4	2	2	seq_256565		100038574	126286649	126328686	-	overlapStart	5578	3579	nearest	Gm10415
6	126574723	126585240	10518	0	0	5	3	seq_256600		16493	126532551	126535412	-	upstream	-39311	39311	nearest	Kcna5
6	127849265	127856386	7122	3	1	2	2	seq_256781		68498	127887589	127953977	+	upstream	-38324	31203	nearest	Tspan11
6	128240088	128250776	10689	1	1	1	5	seq_256834		21679	128224288	128300823	-	inside	60735	15800	nearest	Tead4
6	129915827	129927303	11477	1	3	2	2	seq_257044		16636	129898996	129917650	-	overlapStart	1823	1823	nearest	Klra5
6	132530882	132540604	9723	3	0	3	2	seq_257371		19131	132569809	132572941	+	upstream	-38927	29205	nearest	Prh1
6	134059871	134066576	6706	3	1	1	3	seq_257561		14011	134035700	134270158	+	inside	24171	24171	nearest	Etv6
6	136300705	136312075	11371	4	2	1	1	seq_257905		668137	136327539	136329983	+	upstream	-26834	15464	nearest	Eif4a3l1
6	137459916	137473299	13384	1	2	3	2	seq_258064		13860	137477245	137654876	-	downstream	194960	3946	nearest	Eps8
6	138076713	138088256	11544	2	2	4	1	seq_258153		277898	137983586	138079916	-	overlapStart	3203	3203	nearest	Slc15a5
6	140515598	140523862	8265	3	1	3	2	seq_258457		109135	140424054	140597110	+	inside	91544	73248	nearest	Plekha5
6	144350138	144362284	12147	2	0	4	2	seq_258960		66760	144672868	144693834	+	upstream	-322730	310584	nearest	Sox5os3
6	144674467	144682377	7911	1	1	4	2	seq_259009		66760	144672868	144693834	+	inside	1599	1599	nearest	Sox5os3
6	145136652	145147161	10510	4	0	3	1	seq_259064		16970	145115653	145174934	+	inside	20999	20999	nearest	Lrmp
6	145324650	145331509	6860	1	1	2	4	seq_259088		381827	145391426	145392166	+	upstream	-66776	59917	nearest	1700073E17Rik
6	146819320	146829912	10593	4	1	2	1	seq_259274		69371	146850104	146871406	+	upstream	-30784	20192	nearest	Smco2
6	148433500	148446785	13286	3	2	4	0	seq_259490		387314	148232430	148444389	-	overlapStart	10889	2396	nearest	Tmtc1
6	149397282	149405420	8139	0	2	4	2	seq_259616		12121	149408984	149563329	+	upstream	-11702	3564	nearest	Bicd1
7	8425598	8440882	15285	5	5	2	1	seq_260261		434113	8366164	8383333	-	upstream	-42265	42265	nearest	Vmn2r44
7	8451136	8461299	10164	3	2	1	2	seq_260264		100042810	8469563	8489075	-	downstream	37939	8264	nearest	Vmn2r45
7	12230245	12242341	12097	3	3	4	0	seq_260663		100043092	12221316	12225807	+	downstream	8929	4438	nearest	Gm4224
7	12328576	12341438	12863	4	2	3	0	seq_260675		171243	12321180	12322175	-	upstream	-6401	6401	nearest	Vmn1r83
7	14175452	14190249	14798	3	3	1	2	seq_260917		629203	14067446	14123044	-	upstream	-52408	52408	nearest	Sult2a3
7	15314144	15324738	10595	0	2	5	5	seq_261075	^	246792	15388721	15398545	+	upstream	-74577	63983	nearest	Obox2
7	15394567	15408393	13827	0	1	5	7	seq_261087	^	71468	15388948	15556866	+	inside	5619	5619	nearest	Obox1
7	15409426	15417605	8180	0	4	3	2	seq_261088	^	71468	15388948	15556866	+	inside	20478	20478	nearest	Obox1
7	16120954	16130991	10038	2	2	2	3	seq_261181		110891	16129826	16161063	+	overlapStart	-8872	1165	nearest	Slc8a2
7	17716180	17728547	12368	1	1	4	3	seq_261384		73250	17713238	17761132	+	inside	2942	2942	nearest	Ceacam5
7	17896696	17906051	9356	3	1	2	2	seq_261410		66996	17972124	17978556	+	upstream	-75428	66073	nearest	Ceacam11
7	18097857	18109522	11666	4	4	0	2	seq_261439		67315	18065929	18077986	+	downstream	31928	19871	nearest	Ceacam12
7	18237780	18250500	12721	3	1	3	3	seq_261455		266815	18245347	18266092	+	overlapStart	-7567	5153	nearest	Mill1
7	18527953	18540588	12636	3	3	2	3	seq_261502		114868	18519702	18532269	-	overlapStart	4316	4316	nearest	Psg25
7	19968324	19979054	10731	3	3	2	2	seq_261694		71601	19965412	19991104	+	inside	2912	2912	nearest	Ceacam20
7	22764036	22771228	7193	3	0	4	1	seq_261841	^	667551	22761697	22762590	+	downstream	2339	1446	nearest	Vmn1r157
7	22796165	22809759	13595	3	3	1	3	seq_261846	^	100043067	22789859	22790782	-	upstream	-5383	5383	nearest	Vmn1r158
7	24340968	24349022	8055	4	2	2	0	seq_262018		76942	24349196	24355109	+	upstream	-8228	174	nearest	Lypd5
7	24491165	24499917	8753	4	1	1	2	seq_262035		232969	24507006	24515682	+	upstream	-15841	7089	nearest	Zfp428
7	24937534	24947398	9865	2	2	3	1	seq_262091		232974	24927445	24944494	-	overlapStart	6960	2904	nearest	Gm4881
7	25764756	25773857	9102	1	3	1	3	seq_262205		232989	25721165	25754757	-	upstream	-9999	9999	nearest	Hnrnpul1
7	25881900	25891489	9590	0	0	5	4	seq_262218		13088	25897620	25926624	+	upstream	-15720	6131	nearest	Cyp2b10
7	26051650	26062791	11142	3	1	4	1	seq_262240	^	13089	26061497	26096197	+	overlapStart	-9847	1294	nearest	Cyp2b13
7	26346158	26358747	12590	1	3	3	2	seq_262288		13086	26307169	26315088	+	downstream	38989	31070	nearest	Cyp2a4
7	26748436	26755950	7515	1	2	3	2	seq_262338		13090	26757142	26772630	+	upstream	-8706	1192	nearest	Cyp2b19
7	27261802	27273033	11232	3	1	1	3	seq_262410		18223	27258433	27282144	+	inside	3369	3369	nearest	Numbl
7	28401314	28411592	10279	1	1	3	5	seq_262559		54624	28392951	28399388	+	downstream	8363	1926	nearest	Paf1
7	30417408	30426309	8902	2	2	0	4	seq_262803		23900	30417712	30419854	-	includeFeature	2446	304	nearest	Hcst
7	31371225	31380680	9456	2	5	0	2	seq_262936	^	384585	31375592	31376916	+	includeFeature	-4367	3764	nearest	Scgb1b3
7	31460305	31469550	9246	2	2	1	3	seq_262951		384585	31375592	31376916	+	downstream	84713	83389	nearest	Scgb1b3
7	31960664	31969087	8424	3	0	4	1	seq_263016	^	100043842	32209173	32211145	-	downstream	250481	240086	nearest	Scgb2b11
7	32082904	32091873	8970	3	2	0	3	seq_263031		100043842	32209173	32211145	-	downstream	128241	117300	nearest	Scgb2b11
7	33816214	33826130	9917	3	1	3	2	seq_263200		100043860	33743799	33744982	+	downstream	72415	71232	nearest	Scgb1b24
7	33842412	33854402	11991	3	4	0	2	seq_263203		110187	33943002	33945040	-	downstream	102628	88600	nearest	Scgb2b26
7	34048571	34056566	7996	3	2	2	3	seq_263226		11354	34021483	34022881	+	downstream	27088	25690	nearest	Scgb1b27
7	34816050	34825571	9522	4	0	3	3	seq_263329		68947	34674468	34812711	-	upstream	-3339	3339	nearest	Chst8
7	35423601	35436936	13336	2	2	5	1	seq_263411		30962	35448796	35466036	+	upstream	-25195	11860	nearest	Slc7a9
7	39134104	39146716	12613	2	3	2	2	seq_263886	^	330513	39407294	39413160	-	downstream	279056	260578	nearest	Gm5114
7	40069904	40076762	6859	3	2	3	0	seq_263983		70227	39517766	39540420	+	downstream	552138	529484	nearest	Zfp619
7	40127118	40141895	14778	2	1	5	6	seq_263990		71029	40674737	40691273	+	upstream	-547619	532842	nearest	4933402C06Rik
7	40183848	40197668	13821	1	2	4	2	seq_263999		71029	40674737	40691273	+	upstream	-490889	477069	nearest	4933402C06Rik
7	43129988	43144812	14825	6	2	1	2	seq_264386	^	668620	43114229	43192109	+	inside	15759	15759	nearest	Zfp936
7	43185346	43200110	14765	4	5	4	1	seq_264392	^	100170401	43214039	43226842	+	upstream	-28693	13929	nearest	EU599041
7	43726159	43737325	11167	3	2	2	1	seq_264466		626834	43712567	43727534	+	overlapEnd	13592	1375	nearest	Klk13
7	45304737	45320073	15337	1	2	3	3	seq_264667		100040970	45324965	45325617	+	upstream	-20228	4892	nearest	Rpl14-ps1
7	45877565	45885467	7903	2	2	4	0	seq_264737		68137	45872772	45883732	+	overlapEnd	4793	1735	nearest	Kdelr1
7	46369872	46382316	12445	0	3	3	3	seq_264815		17927	46376474	46379099	+	includeFeature	-6602	3217	nearest	Myod1
7	47231656	47246526	14871	3	1	3	3	seq_264922		668725	47234861	47252848	-	overlapEnd	21192	3205	nearest	Mrgpra9
7	47284318	47300122	15805	5	1	0	3	seq_264929		668725	47234861	47252848	-	upstream	-31470	31470	nearest	Mrgpra9
7	47542787	47553772	10986	2	3	3	1	seq_264970		235712	47463806	47528862	-	upstream	-13925	13925	nearest	Mrgpra2b
7	47863217	47871670	8454	1	1	1	5	seq_265014		235854	47980837	47982095	-	downstream	118878	109167	nearest	Mrgpra4
7	48563550	48581422	17873	4	1	6	2	seq_265101		243979	48550965	48558086	-	upstream	-5464	5464	nearest	Mrgprb2
7	49188200	49198095	9896	5	0	3	2	seq_265182		108167511	49122334	49159819	-	upstream	-28381	28381	nearest	9130015G15Rik
7	52446317	52463631	17315	3	1	3	6	seq_265604		100503036	52011683	52015728	-	upstream	-430589	430589	nearest	1700015G11Rik
7	58131633	58138341	6709	0	3	2	3	seq_266322		11982	58658246	58829420	+	upstream	-526613	519905	nearest	Atp10a
7	59085170	59097806	12637	1	0	3	5	seq_266445		22215	59228750	59311536	+	upstream	-143580	130944	nearest	Ube3a
7	59758758	59775842	17085	11	10	7	8	seq_266533	^	64243	59751489	59751582	-	upstream	-7176	7176	nearest	Gm26504
7	63219620	63226238	6619	0	3	2	3	seq_266936		11441	63098692	63212569	-	upstream	-7051	7051	nearest	Chrna7
7	64077835	64090797	12963	7	7	3	4	seq_267058	^	17364	64153835	64269775	+	upstream	-76000	63038	nearest	Trpm1
7	64302938	64312726	9789	3	0	4	2	seq_267087		233315	64287653	64340806	+	inside	15285	15285	nearest	Mtmr10
7	64466778	64478413	11636	4	4	2	2	seq_267111	^	11784	64501706	64753878	+	upstream	-34928	23293	nearest	Apba2
7	64761427	64772333	10907	2	2	0	4	seq_267146		66647	64867052	64872997	-	downstream	111570	94719	nearest	Nsmce3
7	65181886	65190790	8905	4	2	2	1	seq_267201	^	70638	64756091	65156570	-	upstream	-25316	25316	nearest	Fam189a1
7	66772315	66785990	13676	1	2	1	6	seq_267416		545975	66743504	66823691	+	inside	28811	28811	nearest	Cers3
7	68212342	68225252	12911	2	2	2	2	seq_267609		78444	68236610	68264233	-	downstream	51891	11358	nearest	Pgpep1l
7	73437129	73449435	12307	2	2	3	3	seq_268305		319783	73314003	73375774	-	upstream	-61355	61355	nearest	A730056A06Rik
7	73457096	73466954	9859	2	1	1	4	seq_268308		244059	73426638	73541746	-	inside	84650	30458	nearest	Chd2
7	74350843	74361481	10639	2	3	3	2	seq_268433		108116	74275419	74554780	-	inside	203937	75424	nearest	Slco3a1
7	75023797	75031253	7457	1	2	1	4	seq_268530		75205	75030194	75075164	+	overlapStart	-6397	1059	nearest	4930533N22Rik
7	75213204	75223701	10498	3	1	1	3	seq_268556		68954	75308696	75331419	+	upstream	-95492	84995	nearest	1500012K07Rik
7	75626713	75638926	12214	1	0	4	3	seq_268611		75547	75455534	75754609	+	inside	171179	115683	nearest	Akap13
7	77926199	77937304	11106	1	4	3	2	seq_268927		18213	78175959	78578408	-	downstream	652209	238655	nearest	Ntrk3
7	79444396	79456822	12427	2	1	1	4	seq_269125		18975	79446231	79466362	-	overlapEnd	21966	1835	nearest	Polg
7	80233006	80243625	10620	2	3	2	1	seq_269222		269952	80232865	80242061	+	overlapEnd	141	141	nearest	Gdpgp1
7	80564967	80572917	7951	2	1	3	2	seq_269261		12144	80454733	80535119	-	upstream	-29848	29848	nearest	Blm
7	93072380	93084800	12421	1	3	1	3	seq_270846		100040298	93178983	93184176	-	downstream	111796	94183	nearest	Gm15501
7	93936963	93948090	11128	2	2	2	2	seq_270952		100040298	93178983	93184176	-	upstream	-752787	752787	nearest	Gm15501
7	97778626	97787493	8868	2	2	2	2	seq_271442		18479	97788541	97912381	+	upstream	-9915	1048	nearest	Pak1
7	98085992	98094012	8021	3	1	2	2	seq_271481		17921	98051060	98119524	-	inside	33532	25512	nearest	Myo7a
7	103388869	103399118	10250	1	1	3	4	seq_272187		259073	103383062	103384000	-	upstream	-4869	4869	nearest	Olfr603
7	106476501	106485542	9042	3	3	0	2	seq_272550		668128	106323414	106330688	-	upstream	-145813	145813	nearest	Gm8989
7	112685356	112697039	11684	4	0	0	4	seq_273399		21676	112679318	112906807	+	inside	6038	6038	nearest	Tead1
7	115920286	115928915	8630	1	2	3	2	seq_273840		68469	116031979	116032550	+	upstream	-111693	103064	nearest	Sox6os
7	115942303	115955509	13207	3	3	2	2	seq_273843		68469	116031979	116032550	+	upstream	-89676	76470	nearest	Sox6os
7	117028519	117035513	6995	3	2	2	1	seq_273986		233781	117380979	117673580	+	upstream	-352460	345466	nearest	Xylt1
7	117259138	117266678	7541	0	1	2	5	seq_274019		233781	117380979	117673580	+	upstream	-121841	114301	nearest	Xylt1
7	118783473	118795340	11868	2	1	1	5	seq_274234		71517	118740226	118842966	+	inside	43247	43247	nearest	Vps35l
7	119399067	119409468	10402	2	2	1	3	seq_274316		67133	119442537	119459285	-	downstream	60218	33069	nearest	Gp2
7	119449901	119457240	7340	2	3	1	2	seq_274322		67133	119442537	119459285	-	inside	9384	2045	nearest	Gp2
7	119893388	119903025	9638	2	3	2	2	seq_274392		73919	119895861	119956963	+	overlapStart	-2473	2473	nearest	Lyrm1
7	120465515	120479251	13737	0	3	2	4	seq_274467		233810	120409647	120544813	+	inside	55868	55868	nearest	Abca16
7	121500585	121508314	7730	1	1	3	3	seq_274602		69407	121589903	121591591	+	upstream	-89318	81589	nearest	1700025J12Rik
7	122083780	122096936	13157	0	2	3	5	seq_274683		70316	122085403	122101886	-	overlapEnd	18106	1623	nearest	Ndufab1
7	122593383	122607500	14118	0	5	2	5	seq_274751		54376	122670492	122769393	+	upstream	-77109	62992	nearest	Cacng3
7	122794191	122806096	11906	3	3	2	0	seq_274776		54376	122670492	122769393	+	downstream	123699	24798	nearest	Cacng3
7	123338691	123347428	8738	3	1	4	0	seq_274851		30949	123369784	123430358	+	upstream	-31093	22356	nearest	Lcmt1
7	123370359	123380715	10357	2	0	3	3	seq_274855		70497	123279218	123369915	-	upstream	-444	444	nearest	Arhgap17
7	123827231	123835462	8232	3	2	2	1	seq_274910		628779	123982869	124398989	+	upstream	-155638	147407	nearest	Hs3st4
7	123982984	123993993	11010	0	0	5	3	seq_274933		628779	123982869	124398989	+	inside	115	115	nearest	Hs3st4
7	124485509	124495983	10475	2	3	3	1	seq_275002		73076	124625670	124708935	-	downstream	223426	129687	nearest	3100003L05Rik
7	124868101	124884089	15989	3	3	4	2	seq_275059		73076	124625670	124708935	-	upstream	-159166	159166	nearest	3100003L05Rik
7	124971824	124984451	12628	2	4	1	1	seq_275071		73076	124625670	124708935	-	upstream	-262889	262889	nearest	3100003L05Rik
7	125183276	125191136	7861	1	1	4	2	seq_275101		71208	125284025	125349788	-	downstream	166512	92889	nearest	4933440M02Rik
7	125617490	125631341	13852	4	3	1	0	seq_275160		60504	125603429	125633570	+	inside	14061	2229	nearest	Il21r
7	125723943	125733588	9646	1	1	1	5	seq_275173		233865	125707888	125874793	+	inside	16055	16055	nearest	D430042O09Rik
7	125734187	125745101	10915	1	0	4	3	seq_275174		233865	125707888	125874793	+	inside	26299	26299	nearest	D430042O09Rik
7	127308521	127318763	10243	3	0	5	1	seq_275377		16408	127296260	127335138	+	inside	12261	12261	nearest	Itgal
7	127484733	127495845	11113	3	0	4	2	seq_275397		102465642	127489251	127489387	+	includeFeature	-4518	4518	nearest	Mir7060
7	127544607	127553291	8685	1	2	1	4	seq_275402		105180375	127560085	127566940	+	upstream	-15478	6794	nearest	Tmem265
7	127785182	127793554	8373	3	1	1	3	seq_275423		101502	127799391	127803802	+	upstream	-14209	5837	nearest	Hsd3b7
7	129071747	129083339	11593	2	0	1	5	seq_275590		381925	129257031	129391412	+	upstream	-185284	173692	nearest	Plpp4
7	130623543	130636635	13093	1	4	2	2	seq_275794		57752	130577438	130764785	+	inside	46105	46105	nearest	Tacc2
7	131458967	131465902	6936	1	1	6	1	seq_275901		66885	131410601	131448944	+	downstream	48366	10023	nearest	Acadsb
7	133801726	133808747	7022	2	2	3	2	seq_276232		101437	133720942	133782726	-	upstream	-19000	19000	nearest	Dhx32
7	133837520	133849678	12159	5	0	3	1	seq_276239		101437	133720942	133782726	-	upstream	-54794	54794	nearest	Dhx32
7	135451935	135462947	11013	2	3	3	2	seq_276476		270004	135410308	135413622	+	downstream	41627	38313	nearest	Foxi2
7	136515158	136529451	14294	1	5	3	4	seq_276626		330664	136332216	136349415	-	upstream	-165743	165743	nearest	C230079O03Rik
7	137083372	137097315	13944	3	0	2	6	seq_276703		100038555	137234683	137242609	+	upstream	-151311	137368	nearest	Gm10578
7	138006791	138017422	10632	2	3	0	3	seq_276839		70571	138208974	138397730	-	downstream	390939	191552	nearest	Tcerg1l
7	138377236	138388511	11276	2	0	2	5	seq_276892		70571	138208974	138397730	-	inside	20494	9219	nearest	Tcerg1l
7	138398610	138408567	9958	4	1	1	2	seq_276894		70571	138208974	138397730	-	upstream	-880	880	nearest	Tcerg1l
7	138900130	138913445	13316	4	0	4	1	seq_276963		12176	138890836	138909519	-	overlapStart	9389	3926	nearest	Bnip3
7	139169525	139177689	8165	4	1	1	2	seq_276992		76612	139212988	139242979	+	upstream	-43463	35299	nearest	Lrrc27
7	140594707	140607334	12628	1	3	1	3	seq_277209		18345	140601269	140617678	+	overlapStart	-6562	6065	nearest	Olfr46
7	141606191	141616370	10180	4	2	1	1	seq_277335		100036523	141610066	141613747	-	includeFeature	7556	2623	nearest	Gm16982
7	142738045	142745469	7425	3	1	4	0	seq_277488		16334	142678656	142743381	-	overlapStart	5336	2088	nearest	Ins2
7	142789171	142798244	9074	4	0	1	3	seq_277494		16334	142678656	142743381	-	upstream	-45790	45790	nearest	Ins2
7	144006732	144018119	11388	2	2	1	4	seq_277662		100526562	144009254	144009338	+	includeFeature	-2522	2522	nearest	Mir3105
7	144081958	144094867	12910	4	2	2	5	seq_277671		100526562	144009254	144009338	+	downstream	72704	72620	nearest	Mir3105
8	3358294	3371181	12888	3	2	2	1	seq_277917		102098	3353415	3456601	+	inside	4879	4879	nearest	Arhgef18
8	3439254	3450170	10917	3	2	2	2	seq_277930		69129	3457105	3467680	-	downstream	28426	6935	nearest	Pex11g
8	3490629	3508875	18247	3	3	4	3	seq_277937		140482	3493138	3497208	+	includeFeature	-2509	2509	nearest	Zfp358
8	3976403	3990189	13787	4	3	2	0	seq_278007		170776	3940222	3954746	-	upstream	-21657	21657	nearest	Cd209c
8	6034563	6043635	9073	4	0	0	4	seq_278258		20494	5083219	5105351	-	upstream	-929212	929212	nearest	Slc10a2
8	10465269	10477691	12423	2	1	3	4	seq_278855		244281	10153911	10634742	+	inside	311358	157051	nearest	Myo16
8	10685220	10696149	10930	6	1	1	1	seq_278889		320014	10870422	10882454	-	downstream	197234	174273	nearest	B930025P03Rik
8	12817365	12833075	15711	2	2	5	1	seq_279197		100504249	12828335	12833865	-	overlapEnd	16500	790	nearest	Gm15350
8	13432740	13445097	12358	2	2	5	1	seq_279275		272465	13435189	13468473	+	overlapStart	-2449	2449	nearest	Tmem255b
8	14736358	14744474	8117	4	1	2	1	seq_279448		26889	14881335	14901720	+	upstream	-144977	136861	nearest	Cln8
8	15366778	15380316	13539	5	1	1	2	seq_279533		17930	15057653	15133541	+	downstream	309125	233237	nearest	Myom2
8	15699984	15714089	14106	3	2	3	2	seq_279580		100526464	16168757	16168838	-	downstream	468854	454668	nearest	Mir3106
8	19699061	19706820	7760	2	3	2	4	seq_280115	^	626415	19729576	19753527	+	upstream	-30515	22756	nearest	4930467E23Rik
8	19905391	19913853	8463	1	2	5	3	seq_280134	^	626415	19729576	19753527	+	downstream	175815	151864	nearest	4930467E23Rik
8	20359726	20372131	12406	1	2	2	5	seq_280182	^	100040599	20337664	20363210	-	overlapStart	3484	3484	nearest	Gm15319
8	20374116	20382294	8179	2	1	6	2	seq_280183	^	100040599	20337664	20363210	-	upstream	-10906	10906	nearest	Gm15319
8	20508853	20538028	29176	8	3	13	2	seq_280196	^	100861668	20614919	20640703	+	upstream	-106066	76891	nearest	Gm21119
8	20538808	20550556	11749	5	2	5	4	seq_280197	^	100861668	20614919	20640703	+	upstream	-76111	64363	nearest	Gm21119
8	20592771	20601772	9002	2	2	2	5	seq_280203	^	100861668	20614919	20640703	+	upstream	-22148	13147	nearest	Gm21119
8	20676170	20687599	11430	2	2	3	3	seq_280213	^	100861668	20614919	20640703	+	downstream	61251	35467	nearest	Gm21119
8	20811547	20820295	8749	2	1	6	5	seq_280219	^	654453	20892669	20897723	+	upstream	-81122	72374	nearest	Defb33
8	20887008	20900436	13429	1	4	4	2	seq_280229		654453	20892669	20897723	+	includeFeature	-5661	2713	nearest	Defb33
8	22848083	22857423	9341	3	1	2	2	seq_280480		244349	22859535	22943259	+	upstream	-11452	2112	nearest	Kat6a
8	23038476	23048167	9692	2	1	5	2	seq_280505		11733	22974844	23150497	+	inside	63632	63632	nearest	Ank1
8	23924268	23938674	14407	1	4	6	3	seq_280622		320158	23636019	24156585	+	inside	288249	217911	nearest	Zmat4
8	24066665	24079771	13107	4	2	1	2	seq_280639		69068	24437180	24438984	-	downstream	372319	357409	nearest	Tcim
8	26152353	26163835	11483	5	0	2	2	seq_280915		73754	26158141	26164151	+	overlapStart	-5788	316	nearest	Thap1
8	27377751	27386856	9106	4	2	1	1	seq_281076		108043	27368711	27399730	+	inside	9040	9040	nearest	Chrnb3
8	28030982	28039378	8397	0	0	5	4	seq_281161		666422	28082694	28084920	-	downstream	53938	43316	nearest	Gm8096
8	28749280	28761895	12616	4	1	1	2	seq_281261		210801	28646717	29219636	-	inside	470356	102563	nearest	Unc5d
8	29265244	29274029	8786	5	0	2	1	seq_281327		210801	28646717	29219636	-	upstream	-45608	45608	nearest	Unc5d
8	30461192	30469902	8711	0	2	3	3	seq_281471		71314	30568393	30575573	+	upstream	-107201	98491	nearest	4933433F19Rik
8	30816425	30825881	9457	2	1	5	1	seq_281520		71314	30568393	30575573	+	downstream	248032	240852	nearest	4933433F19Rik
8	32136497	32145198	8702	0	4	5	0	seq_281712		211323	31814551	32884797	-	inside	748300	321946	nearest	Nrg1
8	45439645	45454328	14684	0	1	6	2	seq_283376		142980	45395665	45411080	-	upstream	-28565	28565	nearest	Tlr3
8	46084842	46094767	9926	2	3	2	2	seq_283458		66756	46151771	46195590	+	upstream	-66929	57004	nearest	Cfap97
8	46819769	46834786	15018	3	3	5	2	seq_283564		16363	46739732	46847458	+	inside	80037	12672	nearest	Irf2
8	55345049	55352040	6992	3	1	4	1	seq_284565	^	234267	54954843	55060871	+	downstream	390206	284178	nearest	Gpm6a
8	55393123	55403079	9957	2	4	4	1	seq_284570	^	234267	54954843	55060871	+	downstream	438280	332252	nearest	Gpm6a
8	56468432	56476746	8315	0	4	1	3	seq_284698		75123	56465622	56484968	-	inside	16536	2810	nearest	4930518J21Rik
8	64411415	64420018	8604	1	0	3	4	seq_285639		735270	64514332	64514441	-	downstream	103026	94314	nearest	Mir710
8	66247315	66253193	5879	2	3	2	1	seq_285878		66282	66473118	66486530	-	downstream	239215	219925	nearest	Tma16
8	71172711	71181579	8869	3	1	2	2	seq_286545		69419	70948246	71085758	-	upstream	-86953	86953	nearest	1700026F02Rik
8	71814649	71828281	13633	1	4	6	11	seq_286638	^	236193	71882019	71895727	+	upstream	-67370	53738	nearest	Zfp709
8	71828568	71844484	15917	4	1	4	5	seq_286639	^	236193	71882019	71895727	+	upstream	-53451	37535	nearest	Zfp709
8	72078334	72086814	8481	4	1	4	1	seq_286670		258532	72099762	72100706	+	upstream	-21428	12948	nearest	Olfr373
8	76135411	76148478	13068	2	4	2	3	seq_287206		71831	75448694	75984503	+	downstream	686717	150908	nearest	Iqcm
8	76576594	76586952	10359	3	2	3	1	seq_287266		110784	76899442	77245012	+	upstream	-322848	312490	nearest	Nr3c2
8	79491949	79500094	8146	1	2	3	2	seq_287660		17125	79338395	79399518	-	upstream	-92431	92431	nearest	Smad1
8	80897120	80907362	10243	2	1	5	1	seq_287850		14388	80764438	80880519	-	upstream	-16601	16601	nearest	Gab1
8	81613726	81623321	9596	0	3	2	3	seq_287941		234515	81342556	82127914	+	inside	271170	271170	nearest	Inpp4b
8	82896750	82907591	10842	3	4	0	3	seq_288098		330812	82863356	83091268	+	inside	33394	33394	nearest	Rnf150
8	83098277	83112792	14516	2	1	2	4	seq_288127		71310	83165352	83272934	+	upstream	-67075	52560	nearest	Tbc1d9
8	87119442	87127713	8272	1	2	1	4	seq_288654		100038706	87169747	87199850	-	downstream	80408	42034	nearest	Gm10637
8	87714627	87725567	10941	4	1	0	3	seq_288732		330820	87563853	87589424	+	downstream	150774	125203	nearest	4933402J07Rik
8	89593071	89604223	11153	3	1	3	1	seq_288988		58198	89027235	89044162	-	upstream	-548909	548909	nearest	Sall1
8	89996950	90006095	9146	2	1	4	1	seq_289048		244579	90247040	90348343	-	downstream	351393	240945	nearest	Tox3
8	90153320	90165146	11827	4	4	1	1	seq_289070		244579	90247040	90348343	-	downstream	195023	81894	nearest	Tox3
8	90533907	90546832	12926	3	2	1	2	seq_289123		244579	90247040	90348343	-	upstream	-185564	185564	nearest	Tox3
8	90812733	90825659	12927	0	3	5	1	seq_289160		100503868	90816145	90817393	-	includeFeature	4660	3412	nearest	Gm19935
8	91784058	91792866	8809	3	1	3	1	seq_289287		16373	91798525	91802067	-	downstream	18009	5659	nearest	Irx3
8	93672259	93681256	8998	0	1	4	3	seq_289535		108167546	93707015	93719975	-	downstream	47716	25759	nearest	Gm30606
8	97229814	97240947	11134	3	2	1	2	seq_290005		14719	95864134	95888547	-	upstream	-1341267	1341267	nearest	Got2
8	101266044	101279300	13257	3	0	4	2	seq_290521		12552	102632095	102785642	-	downstream	1519598	1352795	nearest	Cdh11
8	104926637	104934840	8204	2	4	1	1	seq_291000		234673	104926260	104934672	+	overlapEnd	377	168	nearest	Ces2e
8	108493327	108505242	11916	1	2	3	3	seq_291486		109215	108553252	108584595	-	downstream	91268	48010	nearest	Lncbate1
8	109535786	109547328	11543	1	1	5	1	seq_291629		64340	109548011	109565861	-	downstream	30075	683	nearest	Dhx38
8	109563656	109570146	6491	0	4	1	3	seq_291632		64340	109548011	109565861	-	overlapStart	2205	2205	nearest	Dhx38
8	112391041	112400421	9381	2	3	3	0	seq_291998		102640845	112554617	112569575	-	downstream	178534	154196	nearest	Gm26994
8	113850015	113864138	14124	3	2	4	1	seq_292183		208936	113697126	113848738	-	upstream	-1277	1277	nearest	Adamts18
8	117861393	117870911	9519	2	1	4	3	seq_292764		68533	117791645	117801943	-	upstream	-59450	59450	nearest	Mphosph6
8	118873381	118880664	7284	3	1	2	3	seq_292914		68196	119344488	119348922	+	upstream	-471107	463824	nearest	Hsbp1
8	119948064	119960259	12196	3	1	1	4	seq_293077		78892	119992438	120052793	+	upstream	-44374	32179	nearest	Crispld2
8	121600663	121612132	11470	1	5	1	2	seq_293314		67443	121590361	121598760	+	downstream	10302	1903	nearest	Map1lc3b
8	123218346	123239362	21017	2	7	2	7	seq_293525		71186	123230799	123242359	+	overlapStart	-12453	2997	nearest	4933417D19Rik
8	123419917	123429662	9746	4	1	3	2	seq_293549		23854	123423527	123463270	+	overlapStart	-3610	3610	nearest	Def8
8	123731992	123747735	15744	3	1	3	4	seq_293590		234863	123733958	123739941	+	includeFeature	-1966	1966	nearest	6030466F02Rik
8	124081445	124093235	11791	3	0	2	5	seq_293638		100316819	124022641	124022722	+	downstream	58804	58723	nearest	Mir1967
8	125405233	125417485	12253	2	0	4	2	seq_293827		244668	125418063	125569808	-	downstream	164575	578	nearest	Sipa1l2
8	125596675	125610570	13896	2	2	2	3	seq_293850		75930	125584632	125625605	+	inside	12043	12043	nearest	4930567H12Rik
8	127160881	127172615	11735	2	1	4	1	seq_294070		93742	127063893	127612286	+	inside	96988	96988	nearest	Pard3
9	2998999	3043223	44225	7032	5364	6662	7274	seq_294357	^	100628572	3038669	3038743	-	includeFeature	39744	4480	nearest	Mir101c
9	3057106	3070158	13053	1	6	2	6	seq_294360		100628572	3038669	3038743	-	upstream	-18363	18363	nearest	Mir101c
9	6707754	6715114	7361	2	5	1	2	seq_294828		71829	6262733	6269846	-	upstream	-437908	437908	nearest	Ddi1
9	8686338	8696982	10645	2	3	0	3	seq_295104		102634431	8644073	8740988	-	inside	54650	42265	nearest	Gm32014
9	11658633	11667119	8487	0	2	1	5	seq_295472		244682	9660891	10904775	-	upstream	-753858	753858	nearest	Cntn5
9	12159855	12166409	6555	4	1	2	1	seq_295534		78219	13091256	13105858	-	downstream	946003	924847	nearest	4930568E12Rik
9	13908478	13921400	12923	2	0	1	5	seq_295771		72826	13827716	13854987	+	downstream	80762	53491	nearest	Fam76b
9	14524661	14536141	11481	1	2	2	4	seq_295862		66070	14500617	14510577	+	downstream	24044	14084	nearest	Cwc15
9	14735070	14747561	12492	1	3	2	2	seq_295890		330890	14696230	14740733	-	overlapStart	5663	5663	nearest	Piwil4
9	15069552	15077753	8202	3	0	3	2	seq_295933		55991	15002128	15045478	-	upstream	-24074	24074	nearest	Panx1
9	16790593	16797296	6704	2	0	4	2	seq_296158		270120	15910189	16501285	-	upstream	-289308	289308	nearest	Fat3
9	18633229	18648093	14865	4	5	1	4	seq_296385		18322	18754553	18755709	-	downstream	122480	106460	nearest	Olfr24
9	19550993	19561723	10731	4	1	2	3	seq_296511		258515	19566435	19567382	-	downstream	16389	4712	nearest	Olfr854
9	22001234	22009647	8414	3	0	4	1	seq_296854		77609	21989871	22002634	-	overlapStart	1400	1400	nearest	Ccdc151
9	23017212	23033373	16162	2	0	4	3	seq_296977		73230	23223076	23485200	+	upstream	-205864	189703	nearest	Bmper
9	23058793	23070843	12051	4	2	3	3	seq_296980		73230	23223076	23485200	+	upstream	-164283	152233	nearest	Bmper
9	25048341	25056521	8181	4	0	1	3	seq_297234		102631612	24974208	24998420	+	downstream	74133	49921	nearest	E130101E03Rik
9	27639200	27649191	9992	3	1	3	1	seq_297587		330908	27790947	28925410	+	upstream	-151747	141756	nearest	Opcml
9	28235326	28246971	11646	1	1	3	6	seq_297667		330908	27790947	28925410	+	inside	444379	444379	nearest	Opcml
9	29580013	29591593	11581	2	2	3	2	seq_297853		235106	28994750	29963141	-	inside	383128	371548	nearest	Ntm
9	30001349	30010741	9393	3	2	0	4	seq_297909		235106	28994750	29963141	-	upstream	-38208	38208	nearest	Ntm
9	30618769	30628064	9296	3	1	0	4	seq_297982		102607	30427108	30466733	+	downstream	191661	152036	nearest	Snx19
9	30647312	30656964	9653	4	1	0	3	seq_297986	^	102607	30427108	30466733	+	downstream	220204	180579	nearest	Snx19
9	34278110	34286458	8349	1	1	4	2	seq_298464		67703	34486125	35036716	+	upstream	-208015	199667	nearest	Kirrel3
9	34599315	34610790	11476	5	1	0	2	seq_298510		67703	34486125	35036716	+	inside	113190	113190	nearest	Kirrel3
9	35302970	35307195	4226	744	593	748	823	seq_298609	^	71133	35281105	35285423	+	downstream	21865	17547	nearest	4933422A05Rik
9	35535472	35548784	13313	2	4	0	6	seq_298645		30959	35536647	35558528	-	overlapEnd	23056	1175	nearest	Ddx25
9	35785434	35793296	7863	2	1	4	1	seq_298673		68171	35788050	35790112	-	includeFeature	4678	2616	nearest	Pate6
9	36151619	36156247	4629	0	2	2	4	seq_298718		100041618	36134246	36135630	-	upstream	-15989	15989	nearest	Gm3434
9	36186761	36199651	12891	3	0	5	0	seq_298721		100041618	36134246	36135630	-	upstream	-51131	51131	nearest	Gm3434
9	37696799	37710578	13780	2	3	2	1	seq_298931		80706	37711348	37712277	-	downstream	15478	770	nearest	Olfr160
9	38380066	38390538	10473	2	0	6	0	seq_299011		258874	38377883	38378833	+	downstream	2183	1233	nearest	Olfr900
9	40986761	40996699	9939	1	3	1	3	seq_299345		54698	40969691	41004628	-	inside	17867	7929	nearest	Crtam
9	41495513	41504279	8767	1	3	3	2	seq_299416		723892	41531425	41531504	+	upstream	-35912	27146	nearest	Mir100
9	41835619	41847056	11438	4	3	1	2	seq_299465		387236	41581926	41582002	+	downstream	253693	253617	nearest	Mir125b-1
9	44145155	44154349	9195	2	2	3	1	seq_299780		100038560	44122186	44134485	-	upstream	-10670	10670	nearest	Gm10687
9	44665662	44670707	5046	0	3	3	2	seq_299853		58866	44673233	44686305	+	upstream	-7571	2526	nearest	Treh
9	46596481	46604147	7667	1	1	2	4	seq_300109		74361	46303361	46319986	-	upstream	-276495	276495	nearest	4931429L15Rik
9	46916109	46924753	8645	3	0	3	2	seq_300160		73040	46913493	46927366	+	inside	2616	2613	nearest	2900052N01Rik
9	47063335	47073702	10368	4	0	4	1	seq_300183		215467	46998741	47003860	+	downstream	64594	59475	nearest	Gm4791
9	47335208	47341123	5916	1	1	1	5	seq_300217		54725	47530173	47857637	+	upstream	-194965	189050	nearest	Cadm1
9	47418709	47426955	8247	2	1	2	4	seq_300229		54725	47530173	47857637	+	upstream	-111464	103218	nearest	Cadm1
9	48114372	48125822	11451	2	2	2	3	seq_300328		244853	48162023	48400025	+	upstream	-47651	36201	nearest	Nxpe4
9	49991191	49999783	8593	4	2	1	1	seq_300594		17967	49502136	49798925	-	upstream	-192266	192266	nearest	Ncam1
9	50374842	50383247	8406	2	3	2	1	seq_300649		76509	50494525	50505482	+	upstream	-119683	111278	nearest	Plet1
9	51196652	51208579	11928	0	1	6	1	seq_300749		18985	51213708	51240080	+	upstream	-17056	5129	nearest	Pou2af1
9	52659641	52670809	11169	2	1	3	3	seq_300948		330941	52673042	52679780	-	downstream	20139	2233	nearest	AI593442
9	54931308	54936881	5574	2	0	2	4	seq_301244		26441	54950790	54958030	+	upstream	-19482	13909	nearest	Psma4
9	55118370	55132588	14219	4	2	4	3	seq_301267		109161	55148854	55207529	+	upstream	-30484	16266	nearest	Ube2q2
9	55498296	55508765	10470	2	2	0	4	seq_301314		110842	55454508	55512243	-	inside	13947	3478	nearest	Etfa
9	56783237	56794006	10770	2	2	2	2	seq_301469		235402	56618475	56796468	-	inside	13231	2462	nearest	Lingo1
9	58347620	58360772	13153	3	3	2	0	seq_301694		74286	58359704	58370455	-	overlapEnd	22835	1068	nearest	Tbc1d21
9	60729932	60739133	9202	0	2	5	2	seq_302004	^	67557	60712989	60738801	+	overlapEnd	16943	332	nearest	Larp6
9	61709749	61719163	9415	4	2	1	2	seq_302144		56040	61913284	61914542	-	downstream	204793	194121	nearest	Rplp1
9	61842633	61851974	9342	0	4	1	4	seq_302162		56040	61913284	61914542	-	downstream	71909	61310	nearest	Rplp1
9	62715574	62723963	8390	1	0	3	4	seq_302289		319480	62677826	62783982	+	inside	37748	37748	nearest	Itga11
9	63160309	63172153	11845	4	1	2	2	seq_302350		207667	63138170	63148961	-	upstream	-11348	11348	nearest	Skor1
9	63806263	63815569	9307	4	2	2	2	seq_302448		17127	63646767	63757994	-	upstream	-48269	48269	nearest	Smad3
9	64509534	64523281	13748	5	1	2	2	seq_302544		214058	64385626	64709205	+	inside	123908	123908	nearest	Megf11
9	66145418	66155324	9907	1	1	4	2	seq_302761		13143	66158223	66272242	+	upstream	-12805	2899	nearest	Dapk2
9	68023244	68030513	7270	2	0	3	3	seq_303028		434412	68017964	68025714	-	overlapStart	2470	2470	nearest	Gm20745
9	68273750	68284546	10797	3	1	3	2	seq_303065		74951	68470902	68520200	-	downstream	246450	186356	nearest	4930502A04Rik
9	71234028	71245533	11506	3	4	0	3	seq_303465		19378	71215789	71296243	+	inside	18239	18239	nearest	Aldh1a2
9	71272613	71281861	9249	2	3	2	2	seq_303469		19378	71215789	71296243	+	inside	56824	14382	nearest	Aldh1a2
9	72680652	72692107	11456	4	1	2	2	seq_303659		17999	72662346	72749852	+	inside	18306	18306	nearest	Nedd4
9	75273184	75287525	14342	3	3	2	3	seq_304022		14697	75306288	75345876	+	upstream	-33104	18763	nearest	Gnb5
9	77516139	77525423	9285	3	2	1	3	seq_304292		214345	77430823	77544870	-	inside	28731	19447	nearest	Lrrc1
9	97992857	98004712	11856	1	2	5	2	seq_306843		66737	98003420	98012175	+	overlapStart	-10563	1292	nearest	4921534H16Rik
9	100132324	100143613	11290	3	2	3	1	seq_307134		108970	100022300	100034672	+	downstream	110024	97652	nearest	4930519F24Rik
9	101614232	101627317	13086	4	0	2	2	seq_307318		102633035	101342194	101348017	+	downstream	272038	266215	nearest	Gm28979
9	101823480	101834064	10585	0	1	4	3	seq_307349		102466241	102304924	102304975	-	downstream	481495	470860	nearest	Mir7243
9	102003389	102013963	10575	0	1	3	4	seq_307370		102466241	102304924	102304975	-	downstream	301586	290961	nearest	Mir7243
9	105879505	105888211	8707	0	2	5	1	seq_307908		245026	105687809	105828160	-	upstream	-51345	51345	nearest	Col6a6
9	106427966	106439103	11138	2	0	6	2	seq_307978		109652	106432981	106438319	-	includeFeature	10353	784	nearest	Acy1
9	109812440	109820609	8170	0	1	3	6	seq_308427		78709	109812280	109826633	+	inside	160	160	nearest	Spink8
9	111401946	111409761	7816	2	1	2	3	seq_308640		245038	111439081	111489118	+	upstream	-37135	29320	nearest	Dclk3
9	111508653	111517279	8627	2	1	1	5	seq_308651		245038	111439081	111489118	+	downstream	69572	19535	nearest	Dclk3
9	114888658	114899576	10919	2	1	4	1	seq_309113		333433	114899341	114933987	-	overlapEnd	45329	235	nearest	Gpd1l
9	115669345	115679284	9940	1	1	2	4	seq_309224		73748	115909455	116076176	+	upstream	-240110	230171	nearest	Gadl1
9	116267288	116276523	9236	1	4	3	0	seq_309308		100043817	116189180	116194886	+	downstream	78108	72402	nearest	Gm4668
9	117898119	117906027	7909	4	2	1	2	seq_309529		27215	118040499	118069794	+	upstream	-142380	134472	nearest	Azi2
9	117909666	117923721	14056	4	1	3	2	seq_309530		27215	118040499	118069794	+	upstream	-130833	116778	nearest	Azi2
9	118619905	118633014	13110	3	4	1	1	seq_309623		104099	118606690	118901003	+	inside	13215	13215	nearest	Itga9
9	121421905	121429513	7609	0	2	1	5	seq_310013		12424	121489824	121495694	-	downstream	73789	60311	nearest	Cck
9	123459536	123466331	6796	5	1	3	4	seq_310288	^	29806	123478706	123521552	+	upstream	-19170	12375	nearest	Limd1
9	123926545	123937106	10562	2	0	2	4	seq_310345	^	12768	123962124	123968692	-	downstream	42147	25018	nearest	Ccr1
9	124252531	124259014	6484	4	2	6	5	seq_310375	^	630836	124291804	124312696	-	downstream	60165	32790	nearest	2010315B03Rik
10	3106000	3118550	12551	17	8	10	13	seq_24961	^	215728	3119841	3129546	+	upstream	-13841	1291	nearest	9230019H11Rik
10	3153702	3163688	9987	3	1	1	3	seq_24965		619314	3125091	3133193	-	upstream	-20509	20509	nearest	B020014A21Rik
10	4147846	4158244	10399	2	2	1	3	seq_25102		102632515	4206426	4213114	-	downstream	65268	48182	nearest	Gm30570
10	6385580	6395525	9946	4	0	3	1	seq_25387		18390	6758506	7038198	+	upstream	-372926	362981	nearest	Oprm1
10	8666998	8673178	6181	2	2	2	2	seq_25675		338362	8204756	8518825	-	upstream	-148173	148173	nearest	Ust
10	9014366	9031560	17195	4	1	1	5	seq_25718		70097	8722219	8886070	-	upstream	-128296	128296	nearest	Sash1
10	11629306	11636781	7476	2	3	2	3	seq_26047	^	13853	11343404	11459644	+	downstream	285902	169662	nearest	Epm2a
10	13339671	13355218	15548	3	0	8	2	seq_26252		215789	13207717	13474412	-	inside	134741	119194	nearest	Phactr2
10	14044860	14058755	13896	2	4	0	5	seq_26347		15273	13966075	14151374	+	inside	78785	78785	nearest	Hivep2
10	18621446	18630833	9388	2	3	2	1	seq_26934		56016	18539498	18546076	-	upstream	-75370	75370	nearest	Hebp2
10	19727892	19739935	12044	2	0	3	3	seq_27092		237313	19712570	19760053	+	inside	15322	15322	nearest	Il20ra
10	20013693	20025775	12083	1	0	2	5	seq_27125		26408	19934472	20142753	+	inside	79221	79221	nearest	Map3k5
10	22141237	22145142	3906	2	1	3	6	seq_27408	^	319887	22113050	22149270	-	inside	8033	4128	nearest	E030030I06Rik
10	23680959	23692157	11199	4	2	0	3	seq_27607		100529074	23785347	23785475	-	downstream	104516	93190	nearest	Snora33
10	25133242	25146006	12765	0	2	1	5	seq_27791		432442	25169090	25307870	-	downstream	174628	23084	nearest	Akap7
10	26201602	26211236	9635	3	1	2	2	seq_27937		268288	26229707	26272172	+	upstream	-28105	18471	nearest	Samd3
10	38660671	38676392	15722	2	0	3	3	seq_29501		215919	38820541	38821779	-	downstream	161108	144149	nearest	Rfpl4b
10	38967872	38981075	13204	2	0	4	2	seq_29540		16775	38965515	39110188	+	inside	2357	2357	nearest	Lama4
10	40679472	40686977	7506	5	2	1	0	seq_29750		327747	40683282	40811083	+	overlapStart	-3810	3695	nearest	Mettl24
10	43603559	43618177	14619	2	2	0	5	seq_30136		414125	43593397	43709668	+	inside	10162	10162	nearest	F930017D23Rik
10	45152957	45161169	8213	1	2	1	4	seq_30336		78977	45178098	45318452	+	upstream	-25141	16929	nearest	Popdc3
10	45302396	45309654	7259	2	1	3	3	seq_30361		102638854	45287311	45289424	-	upstream	-12972	12972	nearest	Gm15934
10	48397744	48408079	10336	2	1	3	2	seq_30754		14806	49094833	49788766	-	downstream	1391022	686754	nearest	Grik2
10	50850208	50856582	6375	2	1	2	3	seq_31036		20464	50895651	50989152	+	upstream	-45443	39069	nearest	Sim1
10	54382431	54392762	10332	1	0	4	3	seq_31494		17155	53904785	54076609	-	upstream	-305822	305822	nearest	Man1a
10	58220429	58235080	14652	13	8	6	17	seq_31907		664783	58230651	58232675	-	includeFeature	12246	2405	nearest	Dux
10	61843041	61863873	20833	7	1	6	2	seq_32397		404634	61738665	61784147	-	upstream	-58894	58894	nearest	Macroh2a2
10	63350980	63360654	9675	2	2	2	2	seq_32587		93759	63319005	63381704	-	inside	30724	21050	nearest	Sirt1
10	72249969	72264626	14658	2	2	3	6	seq_33711		108950	71980092	71980634	-	upstream	-269335	269335	nearest	1700049L16Rik
10	74948464	74953935	5472	0	3	2	3	seq_34025		14687	74967177	75016907	+	upstream	-18713	13242	nearest	Gnaz
10	76426088	76433768	7681	4	1	3	0	seq_34218		18541	76351263	76442786	-	inside	16698	9018	nearest	Pcnt
10	76626787	76636627	9841	1	2	1	4	seq_34247		12834	76595762	76623630	-	upstream	-3157	3157	nearest	Col6a2
10	77751218	77761425	10208	2	0	3	3	seq_34413		77763	77750521	77751354	-	overlapStart	136	136	nearest	Gm9736
10	77932057	77943644	11588	1	1	4	5	seq_34437		28240	77907722	77970563	-	inside	38506	24335	nearest	Trpm2
10	78091003	78102808	11806	1	2	2	4	seq_34454		50723	78069302	78083913	+	downstream	21701	7090	nearest	Icosl
10	79629470	79639234	9765	2	2	3	1	seq_34656		216148	79618051	79637918	-	overlapStart	8448	1316	nearest	Shc2
10	79644244	79656857	12614	5	0	3	5	seq_34658		382384	79639526	79645738	-	overlapStart	1494	1494	nearest	Odf3l2
10	80399155	80410311	11157	2	3	3	3	seq_34751		17192	80392539	80399550	-	overlapStart	395	395	nearest	Mbd3
10	80778982	80787083	8102	1	2	3	2	seq_34806		20222	80798198	80804924	+	upstream	-19216	11115	nearest	Sf3a2
10	81380878	81392814	11937	3	2	3	1	seq_34890		102115	81384428	81391560	+	includeFeature	-3550	1254	nearest	Dohh
10	82367883	82375011	7129	3	1	2	2	seq_35001		432480	82486537	82492618	-	downstream	124735	111526	nearest	Gm1553
10	84611255	84625090	13836	1	1	3	3	seq_35309		70428	84622292	84727178	+	overlapStart	-11037	2798	nearest	Polr3b
10	84625561	84638041	12481	2	0	3	4	seq_35310		70428	84622292	84727178	+	inside	3269	3269	nearest	Polr3b
10	86116276	86125756	9481	1	1	4	4	seq_35519		78170	86095859	86113586	+	downstream	20417	2690	nearest	4930486F22Rik
10	86527420	86534458	7039	3	2	0	3	seq_35575		27204	86055125	86498896	-	upstream	-28524	28524	nearest	Syn3
10	86862867	86876937	14071	0	1	4	3	seq_35619		103466	86763972	86838389	+	downstream	98895	24478	nearest	Nt5dc3
10	87865796	87880687	14892	3	1	1	4	seq_35754		16000	87858265	87937042	+	inside	7531	7531	nearest	Igf1
10	89089633	89101891	12259	3	0	3	2	seq_35924		216225	88885992	88929515	+	downstream	203641	160118	nearest	Slc5a8
10	90575388	90584496	9109	3	1	2	2	seq_36108		11783	90989311	91082770	-	downstream	507382	404815	nearest	Apaf1
10	92313782	92326969	13188	2	2	4	1	seq_36349		627800	92171301	92375373	-	inside	61591	48404	nearest	Gm20757
10	92589635	92597977	8343	5	1	1	2	seq_36383		17997	92684746	92722420	-	downstream	132785	86769	nearest	Nedd1
10	92626135	92634870	8736	0	1	2	5	seq_36386		17997	92684746	92722420	-	downstream	96285	49876	nearest	Nedd1
10	93011054	93023248	12195	3	1	3	3	seq_36435		380654	92775619	93081618	-	inside	70564	58370	nearest	Cfap54
10	99076882	99086610	9729	2	2	3	3	seq_37244		382406	99107036	99198074	+	upstream	-30154	20426	nearest	Poc1b
10	102260209	102270608	10400	1	1	4	2	seq_37651		67405	102481756	102490486	-	downstream	230277	211148	nearest	Nts
10	102295074	102307405	12332	0	3	3	2	seq_37654		67405	102481756	102490486	-	downstream	195412	174351	nearest	Nts
10	112603970	112615603	11634	1	1	4	3	seq_38896	^	69355	112726888	112785602	+	upstream	-122918	111285	nearest	1700010J16Rik
10	116795466	116804682	9217	0	1	5	2	seq_39400		75878	116729253	116739760	+	downstream	66213	55706	nearest	4930579P08Rik
10	118030634	118043994	13361	0	3	3	2	seq_39564	^	17245	118141811	118168997	+	upstream	-111177	97817	nearest	Mdm1
10	118124149	118133851	9703	1	2	2	3	seq_39576		17245	118141811	118168997	+	upstream	-17662	7960	nearest	Mdm1
10	118368256	118380093	11838	3	2	1	2	seq_39602		15978	118441046	118445892	+	upstream	-72790	60953	nearest	Ifng
10	120420462	120429234	8773	2	2	3	1	seq_39869		791076	120447991	120448110	-	downstream	27648	18757	nearest	Mir763
10	120783983	120795523	11541	2	3	2	1	seq_39914		70874	120765732	120778886	+	downstream	18251	5097	nearest	4921513I03Rik
10	125011937	125025244	13308	2	3	3	1	seq_40459		20503	125219270	125389465	-	downstream	377528	194026	nearest	Slc16a7
10	127205985	127217501	11517	1	1	5	1	seq_40763		117150	127197067	127211585	-	overlapStart	5600	5600	nearest	Pip4k2c
10	127910952	127922437	11486	2	3	1	5	seq_40856		70061	127898518	127911761	+	overlapEnd	12434	809	nearest	Sdr9c7
11	3099021	3106754	7734	7	9	7	10	seq_41188	^	236604	3125904	3131004	+	upstream	-26883	19150	nearest	Pisd-ps1
11	3150487	3156609	6123	2	3	1	2	seq_41194	^	236604	3125904	3131004	+	downstream	24583	19483	nearest	Pisd-ps1
11	3180554	3201063	20510	49	34	52	56	seq_41199	^	74203	3202392	3244588	+	upstream	-21838	1329	nearest	Eif4enif1
11	5932869	5942962	10094	4	2	0	4	seq_41576		103988	5900820	5950081	-	inside	17212	7119	nearest	Gck
11	6205989	6213290	7302	2	2	2	2	seq_41615		209586	6105691	6200415	-	upstream	-5574	5574	nearest	Nudcd3
11	8014734	8026084	11351	2	1	4	1	seq_41865		319939	8431652	8664681	-	downstream	649947	405568	nearest	Tns3
11	10117635	10128841	11207	3	3	3	3	seq_42158		268379	9191942	9684259	+	downstream	925693	433376	nearest	Abca13
11	12448899	12461096	12198	1	1	6	1	seq_42461		12808	12236608	12464960	-	inside	16061	3864	nearest	Cobl
11	12877425	12885250	7826	2	1	1	5	seq_42516		12808	12236608	12464960	-	upstream	-412465	412465	nearest	Cobl
11	13219092	13231116	12025	0	5	4	3	seq_42558		12808	12236608	12464960	-	upstream	-754132	754132	nearest	Cobl
11	19693498	19703574	10077	4	1	1	4	seq_43408		114716	19924375	20024026	+	upstream	-230877	220801	nearest	Spred2
11	22427529	22436235	8707	2	2	2	2	seq_43765	^	103765	22512088	22519234	+	upstream	-84559	75853	nearest	Tmem17
11	22483577	22497193	13617	1	3	4	2	seq_43771		103765	22512088	22519234	+	upstream	-28511	14895	nearest	Tmem17
11	27002177	27013519	11343	1	4	2	1	seq_44354		69922	26471322	26593999	-	upstream	-408178	408178	nearest	Vrk2
11	28633078	28642544	9467	2	2	0	4	seq_44546		72818	28681564	28693276	+	upstream	-48486	39020	nearest	2810471M01Rik
11	31475277	31489862	14586	2	0	4	4	seq_44915		20856	31357307	31370074	-	upstream	-105203	105203	nearest	Stc2
11	33826502	33838254	11753	2	0	2	4	seq_45228		16533	33963013	33973641	+	upstream	-136511	124759	nearest	Kcnmb1
11	35803782	35810533	6752	2	1	2	3	seq_45490		237730	35797382	35798884	-	upstream	-4898	4898	nearest	Fbll1
11	42928172	42936775	8604	0	2	2	4	seq_46383		319767	43149877	43262285	+	upstream	-221705	213102	nearest	Atp10b
11	43377988	43386673	8686	0	0	5	3	seq_46445		387164	43374397	43374461	-	upstream	-3527	3527	nearest	Mir146
11	43568301	43580912	12612	1	0	6	1	seq_46470		16204	43596049	43601540	-	downstream	33239	15137	nearest	Fabp6
11	45837515	45848604	11090	1	2	2	4	seq_46787		216705	45851964	45910625	+	upstream	-14449	3360	nearest	Clint1
11	46144939	46150909	5971	0	1	2	5	seq_46822		214112	46148155	46166508	-	overlapEnd	21569	2754	nearest	Nipal4
11	47095229	47107011	11783	2	1	2	4	seq_46952		276891	46810800	46844332	+	downstream	284429	250897	nearest	Timd4
11	47110316	47120235	9920	1	2	3	2	seq_46954		276891	46810800	46844332	+	downstream	299516	265984	nearest	Timd4
11	48726341	48736870	10530	3	0	2	3	seq_47171		14694	48800332	48806434	+	upstream	-73991	63462	nearest	Rack1
11	49211342	49221100	9759	1	5	3	0	seq_47237		22720	49203292	49218816	+	overlapEnd	8050	2284	nearest	Zfp62
11	49625538	49635165	9628	2	2	2	4	seq_47295		14257	49609263	49652739	+	inside	16275	16275	nearest	Flt4
11	49875820	49887683	11864	2	3	3	3	seq_47329		74563	49901835	49980994	+	upstream	-26015	14152	nearest	Rasgef1c
11	50577255	50590337	13083	1	4	1	6	seq_47427		216725	50602084	50807573	+	upstream	-24829	11747	nearest	Adamts2
11	51471318	51477738	6421	1	4	1	2	seq_47551		72947	51584757	51604489	+	upstream	-113439	107019	nearest	Phykpl
11	52646998	52657934	10937	3	5	1	0	seq_47709		320027	52764634	53188538	+	upstream	-117636	106700	nearest	Fstl4
11	52683810	52693388	9579	1	2	5	2	seq_47714		320027	52764634	53188538	+	upstream	-80824	71246	nearest	Fstl4
11	52965130	52971475	6346	5	3	1	0	seq_47751		790909	53111451	53120056	-	downstream	154926	139976	nearest	Gm11186
11	53772758	53784292	11535	2	3	3	1	seq_47861		16362	53770014	53778374	+	overlapEnd	2744	2744	nearest	Irf1
11	54139028	54141719	2692	1	3	5	1	seq_47908	^	18452	54100095	54131665	+	downstream	38933	7363	nearest	P4ha2
11	54151138	54158455	7318	1	1	4	2	seq_47911		18452	54100095	54131665	+	downstream	51043	19473	nearest	P4ha2
11	54315526	54324760	9235	2	2	3	2	seq_47934		216739	54303798	54364756	+	inside	11728	11728	nearest	Acsl6
11	55854308	55864872	10565	2	0	2	4	seq_48126		216749	56024987	56041010	-	downstream	186702	160115	nearest	Nmur2
11	56001506	56015840	14335	3	4	2	3	seq_48145		216749	56024987	56041010	-	downstream	39504	9147	nearest	Nmur2
11	56286624	56299535	12912	3	2	1	3	seq_48178		216749	56024987	56041010	-	upstream	-245614	245614	nearest	Nmur2
11	57398558	57406257	7700	1	2	5	0	seq_48329		67726	57482993	57518617	-	downstream	120059	76736	nearest	Fam114a2
11	57986187	57996353	10167	0	1	4	3	seq_48407		73158	58009064	58062034	+	upstream	-22877	12711	nearest	Larp1
11	58348493	58355020	6528	2	0	3	3	seq_48458		79566	58330724	58347728	+	downstream	17769	765	nearest	Sh3bp5l
11	59167679	59175015	7337	3	1	3	2	seq_48564		216792	59155369	59163739	-	upstream	-3940	3940	nearest	Iba57
11	59369071	59380465	11395	2	3	2	1	seq_48589		216797	59372669	59375657	-	includeFeature	6586	3598	nearest	Prss38
11	60032965	60045263	12299	1	1	3	5	seq_48692		18618	59970614	60046489	-	inside	13524	1226	nearest	Pemt
11	61715902	61726259	10358	1	2	3	3	seq_48921		109342	61672781	61720826	-	overlapStart	4924	4924	nearest	Slc5a10
11	62189614	62200830	11217	1	2	4	2	seq_48981		11541	62248984	62266453	+	upstream	-59370	48154	nearest	Adora2b
11	62218638	62228970	10333	1	3	1	3	seq_48983		11541	62248984	62266453	+	upstream	-30346	20014	nearest	Adora2b
11	63140037	63146862	6826	0	4	3	1	seq_49105		18858	63128982	63159547	+	inside	11055	11055	nearest	Pmp22
11	63561597	63574630	13034	1	0	4	3	seq_49168		54710	63885792	63922290	-	downstream	360693	311162	nearest	Hs3st3b1
11	64271955	64283172	11218	3	2	2	2	seq_49256		15478	64435332	64522841	+	upstream	-163377	152160	nearest	Hs3st3a1
11	66258800	66273419	14620	4	2	4	4	seq_49539		237806	65831282	66168551	-	upstream	-90249	90249	nearest	Dnah9
11	66455293	66462185	6893	2	1	4	2	seq_49566		380702	66211725	66525964	-	inside	70671	63779	nearest	Shisa6
11	66504304	66517078	12775	1	5	1	1	seq_49573		380702	66211725	66525964	-	inside	21660	8886	nearest	Shisa6
11	67213408	67223631	10224	0	4	2	3	seq_49668		17879	67200052	67224575	+	inside	13356	944	nearest	Myh1
11	67296402	67306108	9707	1	4	2	1	seq_49677		544791	67321658	67371586	+	upstream	-25256	15550	nearest	Myh13
11	70400832	70410054	9223	2	3	3	0	seq_50090		75273	70392883	70410031	-	overlapStart	9199	23	nearest	Pelp1
11	71488060	71498224	10165	3	1	2	2	seq_50229		619299	71512377	71573183	+	upstream	-24317	14153	nearest	9230020A06Rik
11	72078382	72088132	9751	1	1	2	4	seq_50313		109212	72042032	72047370	+	downstream	36350	31012	nearest	Pimreg
11	74569975	74580951	10977	0	4	2	2	seq_50636		380711	74383356	74610915	-	inside	40940	29964	nearest	Rap1gap2
11	76064679	76075313	10635	2	2	2	3	seq_50836		76566	76019194	76027782	-	upstream	-36897	36897	nearest	Rflnb
11	78728439	78738501	10063	3	2	1	2	seq_51196		69109	78750506	78751729	-	downstream	23290	12005	nearest	Ccnq
11	79302280	79314854	12575	0	6	1	3	seq_51270		18015	79339693	79581612	+	upstream	-37413	24839	nearest	Nf1
11	79657047	79667102	10056	5	0	2	2	seq_51319		72218	79670372	79675128	-	downstream	18081	3270	nearest	Rab11fip4os2
11	81698185	81712616	14432	2	2	1	3	seq_51597		237880	81572655	81573473	-	upstream	-124712	124712	nearest	1700071K01Rik
11	81905505	81917961	12457	4	1	1	4	seq_51625		71388	81860673	81894582	+	downstream	44832	10923	nearest	5530401A14Rik
11	82807181	82814685	7505	2	3	1	3	seq_51744		16882	82781108	82804274	+	downstream	26073	2907	nearest	Lig3
11	83731150	83742539	11390	1	3	3	1	seq_51856		66107	83746940	83752642	+	upstream	-15790	4401	nearest	Wfdc21
11	84384997	84395231	10235	5	2	1	0	seq_51945		56321	84422855	84513522	-	downstream	128525	27624	nearest	Aatf
11	85668415	85675689	7275	2	1	2	3	seq_52094		71489	85702200	85719744	-	downstream	51329	26511	nearest	Bcas3os1
11	89149387	89158062	8676	1	3	3	2	seq_52543		217071	89073841	89093040	+	downstream	75546	56347	nearest	Gm525
11	90213373	90223949	10577	2	1	2	3	seq_52697		67468	90187684	90278589	+	inside	25689	25689	nearest	Mmd
11	93720186	93731092	10907	0	3	3	2	seq_53169		217109	93859243	93885766	-	downstream	165580	128151	nearest	Utp18
11	94689278	94697164	7887	3	1	3	1	seq_53304		432589	94694498	94704499	-	overlapEnd	15221	2666	nearest	Gm11541
11	96829770	96838482	8713	2	1	3	2	seq_53569		18023	96817414	96829968	-	overlapStart	198	198	nearest	Nfe2l1
11	96916356	96929085	12730	3	2	1	3	seq_53584		80280	96907426	96916496	-	overlapStart	140	140	nearest	Cdk5rap3
11	98662990	98676022	13033	3	3	4	0	seq_53835	^	57911	98664351	98677708	+	overlapStart	-1361	1361	nearest	Gsdma
11	100514621	100524098	9478	0	3	2	3	seq_54075		104112	100476353	100528000	-	inside	13379	3902	nearest	Acly
11	100965293	100976975	11683	1	2	2	3	seq_54137		19285	100956733	100970887	-	overlapStart	5594	5594	nearest	Cavin1
11	101046764	101057351	10588	1	0	5	2	seq_54148		27419	101070012	101077672	+	upstream	-23248	12661	nearest	Naglu
11	103683822	103693197	9376	3	0	2	3	seq_54479		399609	103697724	103722832	+	upstream	-13902	4527	nearest	C130046K22Rik
11	104319907	104333014	13108	4	1	4	1	seq_54551		17762	104231390	104332090	+	overlapEnd	88517	924	nearest	Mapt
11	111008691	111017042	8352	3	1	2	2	seq_55439		16517	110968033	111027968	+	inside	40658	10926	nearest	Kcnj16
11	111151680	111164002	12323	2	1	3	2	seq_55460		16518	111066164	111076821	+	downstream	85516	74859	nearest	Kcnj2
11	111725052	111735581	10530	3	2	3	1	seq_55534		16518	111066164	111076821	+	downstream	658888	648231	nearest	Kcnj2
11	112612732	112623468	10737	1	2	5	0	seq_55661		217294	112663927	112781976	-	downstream	169244	40459	nearest	BC006965
11	112653968	112661950	7983	1	3	3	1	seq_55665		217294	112663927	112781976	-	downstream	128008	1977	nearest	BC006965
11	116363767	116371158	7392	3	0	4	1	seq_56173		15223	116330704	116335399	-	upstream	-28368	28368	nearest	Foxj1
11	116377033	116391194	14162	3	0	4	4	seq_56176	^	217340	116336353	116413032	-	inside	35999	21838	nearest	Rnf157
11	116495842	116507538	11697	1	2	4	1	seq_56185		67763	116470845	116494202	-	upstream	-1640	1640	nearest	Prpsap1
11	119201705	119212487	10783	2	2	2	2	seq_56568		207592	119143045	119228499	-	inside	26794	16012	nearest	Tbc1d16
11	119300684	119311129	10446	1	1	2	4	seq_56581	^	170720	119307768	119345375	+	overlapStart	-7084	3361	nearest	Card14
12	3009366	3019296	9931	0	5	2	2	seq_56954	^	74173	3235504	3250377	+	upstream	-226138	216208	nearest	Rab10os
12	3108865	3112466	3602	106	98	82	98	seq_56964	^	74173	3235504	3250377	+	upstream	-126639	123038	nearest	Rab10os
12	5641681	5649749	8069	0	1	2	5	seq_57306		72669	5375870	5416631	+	downstream	265811	225050	nearest	2810032G03Rik
12	9277568	9289470	11903	1	4	1	2	seq_57816		75516	9029997	9041988	+	downstream	247571	235580	nearest	Ttc32
12	9461753	9471648	9896	1	3	1	3	seq_57842		23967	9570116	9581500	+	upstream	-108363	98468	nearest	Osr1
12	16769257	16777334	8078	1	0	5	2	seq_58824		268527	16670615	16800886	-	inside	31629	23552	nearest	Greb1
12	17100837	17115950	15114	3	1	6	4	seq_58866		382571	17172100	17176888	-	downstream	76051	56150	nearest	Kcnf1
12	17272388	17282822	10435	4	1	2	1	seq_58886		71853	17266545	17284770	+	inside	5843	1948	nearest	Pdia6
12	17852569	17860921	8353	1	3	0	4	seq_58969		53602	17690856	17791933	+	downstream	161713	60636	nearest	Hpcal1
12	18479574	18488976	9403	3	1	2	2	seq_59060		236366	18514510	18535254	+	upstream	-34936	25534	nearest	5730507C01Rik
12	18670108	18682015	11908	3	3	1	1	seq_59088		236366	18514510	18535254	+	downstream	155598	134854	nearest	5730507C01Rik
12	19176159	19186218	10060	3	3	2	1	seq_59161		236366	18514510	18535254	+	downstream	661649	640905	nearest	5730507C01Rik
12	19416107	19428687	12581	3	1	3	1	seq_59195		236366	18514510	18535254	+	downstream	901597	880853	nearest	5730507C01Rik
12	20219506	20235699	16194	8	5	8	4	seq_59302	^	69513	20804381	20815779	-	downstream	596273	568682	nearest	1700030C10Rik
12	21177178	21191944	14767	2	3	1	5	seq_59425		54451	21285525	21315056	+	upstream	-108347	93581	nearest	Cpsf3
12	21592784	21608382	15599	2	4	5	1	seq_59481		22630	21390071	21417637	-	upstream	-175147	175147	nearest	Ywhaq
12	22090755	22097937	7183	1	3	2	2	seq_59551	^	100043416	22115756	22156646	-	downstream	65891	17819	nearest	Gm4425
12	23039474	23053185	13712	2	2	4	2	seq_59662		69732	22953995	23010284	-	upstream	-29190	29190	nearest	2410018L13Rik
12	25553160	25566329	13170	1	2	5	4	seq_59995		432641	25129174	25134931	+	downstream	423986	418229	nearest	Gm17746
12	25797259	25814679	17421	1	0	6	4	seq_60025		629481	26091962	26210505	-	downstream	413246	277283	nearest	Gm29687
12	27370933	27381097	10165	1	1	3	3	seq_60240		20666	27334264	27342574	-	upstream	-28359	28359	nearest	Sox11
12	27576693	27590818	14126	2	0	4	4	seq_60269	^	20666	27334264	27342574	-	upstream	-234119	234119	nearest	Sox11
12	28687273	28698932	11660	4	1	2	1	seq_60413		102465980	28679325	28679389	+	downstream	7948	7884	nearest	Mir6937
12	29008737	29021124	12388	3	0	2	3	seq_60458		102633758	28910229	29041874	+	inside	98508	20750	nearest	Gm31508
12	38013874	38023105	9232	4	1	2	1	seq_61613		217480	37817726	38634239	+	inside	196148	196148	nearest	Dgkb
12	40018924	40025970	7047	3	1	2	2	seq_61861		11861	40005447	40038025	-	inside	19101	12055	nearest	Arl4a
12	40422244	40434003	11760	1	0	7	2	seq_61915		246196	40315046	40445902	-	inside	23658	11899	nearest	Zfp277
12	48385513	48391009	5497	4	1	1	2	seq_62896		15228	49382660	49386861	+	upstream	-997147	991651	nearest	Foxg1
12	52431850	52444402	12553	2	2	4	0	seq_63388		102638611	52475739	52480609	-	downstream	48759	31337	nearest	Gm35135
12	56870297	56877333	7037	3	1	2	2	seq_63933		18511	56691767	56712822	+	downstream	178530	157475	nearest	Pax9
12	61836093	61843609	7517	3	0	1	4	seq_64554		238205	61523150	61857928	+	inside	312943	14319	nearest	Lrfn5
12	67056921	67063555	6635	20	13	22	19	seq_65177	^	320772	66466060	67222549	-	inside	165628	158994	nearest	Mdga2
12	69053179	69061389	8211	1	3	4	0	seq_65410	^	20090	69157722	69159186	-	downstream	106007	96333	nearest	Rps29
12	69103427	69111292	7866	3	2	2	1	seq_65416		20090	69157722	69159186	-	downstream	55759	46430	nearest	Rps29
12	69443019	69455315	12297	2	2	2	4	seq_65458		76062	69464787	69475550	-	downstream	32531	9472	nearest	5830428M24Rik
12	71491261	71507408	16148	4	5	2	4	seq_65735		73815	71488285	71556133	+	inside	2976	2976	nearest	4930404H11Rik
12	73879301	73890084	10784	2	4	0	3	seq_66038		15251	73901375	73947530	+	upstream	-22074	11291	nearest	Hif1a
12	74802840	74805505	2666	14	8	6	6	seq_66156		238271	74897220	75177332	-	downstream	374492	91715	nearest	Kcnh5
12	75460567	75471798	11232	2	2	2	2	seq_66244		217674	75411722	75416781	-	upstream	-43786	43786	nearest	Gphb5
12	79781395	79793288	11894	1	1	5	2	seq_66802		77290	79917019	79936264	-	downstream	154869	123731	nearest	9430078K24Rik
12	87852982	87867828	14847	2	2	3	2	seq_67882	^	100038982	87861366	87863967	+	includeFeature	-8384	3861	nearest	Gm1995
12	88088985	88101596	12612	7	0	2	1	seq_67918		111043194	88036540	88036798	-	upstream	-52187	52187	nearest	Gm46993
12	88849752	88859525	9774	2	1	5	1	seq_68018		18191	88722876	90334935	+	inside	126876	126876	nearest	Nrxn3
12	90640539	90650874	10336	3	2	2	2	seq_68239		13371	90724552	90738438	-	downstream	97899	73678	nearest	Dio2
12	91526766	91540661	13896	3	3	5	1	seq_68348		83602	91555262	91590487	-	downstream	63721	14601	nearest	Gtf2a1
12	92987494	93000009	12516	2	0	4	3	seq_68530		75295	93416458	93444823	-	downstream	457329	416449	nearest	4930559C10Rik
12	97931747	97943106	11360	3	3	2	0	seq_69133		14420	98202294	98259459	-	downstream	327712	259188	nearest	Galc
12	98712343	98724151	11809	6	1	1	1	seq_69236		24000	98676741	98737405	-	inside	25062	13254	nearest	Ptpn21
12	99055878	99066098	10221	3	1	3	1	seq_69279		67639	99161277	99162808	-	downstream	106930	95179	nearest	4930474N09Rik
12	101248037	101254917	6881	1	4	0	3	seq_69572		74947	101145614	101149758	+	downstream	102423	98279	nearest	Kif4-ps
12	101619839	101630702	10864	3	3	2	1	seq_69610		74413	101645443	101718523	-	downstream	98684	14741	nearest	Tc2n
12	103346846	103356461	9616	1	3	1	4	seq_69847		65256	103321142	103356001	-	overlapStart	9155	460	nearest	Asb2
12	103798387	103815327	16941	3	1	3	5	seq_69907	^	20701	103728156	103830373	-	inside	31986	15046	nearest	Serpina1b
12	103846495	103860304	13810	3	2	2	5	seq_69914		20700	103853589	103863562	-	overlapEnd	17067	3258	nearest	Serpina1a
12	104618735	104627297	8563	5	0	2	1	seq_70041		192119	104687742	104751952	-	downstream	133217	60445	nearest	Dicer1
12	105497092	105506030	8939	5	1	1	1	seq_70157		104932	105513480	105515246	+	upstream	-16388	7450	nearest	AU015791
12	106060791	106072129	11339	6	1	1	1	seq_70234		22367	106010228	106077426	+	inside	50563	5297	nearest	Vrk1
12	108156637	108167006	10370	2	2	2	4	seq_70517		52690	108106431	108179314	-	inside	22677	12308	nearest	Setd3
12	109365437	109377806	12370	1	2	4	1	seq_70676		13386	109452823	109463336	+	upstream	-87386	75017	nearest	Dlk1
12	109507187	109514842	7656	0	1	3	4	seq_70692		17263	109541001	109571726	+	upstream	-33814	26159	nearest	Meg3
12	113735218	113741555	6338	1	1	2	4	seq_71281		238406	113543908	113546465	+	downstream	191310	188753	nearest	Adam6a
12	115364593	115375205	10613	3	4	0	3	seq_71506		102465205	115695720	115695794	-	downstream	331201	320515	nearest	Mir6388
13	3370357	3375171	4815	4	7	11	6	seq_72176	^	76937	3478230	3498570	+	upstream	-107873	103059	nearest	2810429I04Rik
13	5347290	5356026	8737	1	1	2	4	seq_72425		71867	5855508	5858092	-	downstream	510802	499482	nearest	1700016G22Rik
13	8534942	8544950	10009	1	3	4	2	seq_72835		207615	8802968	8871909	-	downstream	336967	258018	nearest	Wdr37
13	8664693	8673614	8922	2	3	3	1	seq_72852		207615	8802968	8871909	-	downstream	207216	129354	nearest	Wdr37
13	8735076	8740910	5835	3	0	2	4	seq_72861		207615	8802968	8871909	-	downstream	136833	62058	nearest	Wdr37
13	9008054	9018582	10529	2	1	5	5	seq_72894		69237	8966331	8996083	-	upstream	-11971	11971	nearest	Gtpbp4
13	9381929	9393583	11655	4	0	2	5	seq_72945		208440	9276528	9668928	+	inside	105401	105401	nearest	Dip2c
13	9827895	9835981	8087	2	1	1	4	seq_73006	^	66505	9684833	9765330	-	upstream	-62565	62565	nearest	Zmynd11
13	9858130	9869482	11353	6	1	1	0	seq_73010		66505	9684833	9765330	-	upstream	-92800	92800	nearest	Zmynd11
13	10131226	10148460	17235	4	4	3	2	seq_73049		12671	9875486	10360847	-	inside	229621	212387	nearest	Chrm3
13	12829347	12841644	12298	4	2	2	4	seq_73385	^	18812	12790816	12800079	-	upstream	-29268	29268	nearest	Prl2c3
13	12886889	12897130	10242	1	1	4	3	seq_73391	^	18812	12790816	12800079	-	upstream	-86810	86810	nearest	Prl2c3
13	12926060	12941227	15168	3	2	7	7	seq_73397	^	18811	12996125	13005383	-	downstream	79323	54898	nearest	Prl2c2
13	15329359	15338497	9139	4	0	3	2	seq_73709		14634	15463235	15730026	+	upstream	-133876	124738	nearest	Gli3
13	24207376	24215166	7791	4	2	0	2	seq_74899		68732	24012344	24280795	-	inside	73419	65629	nearest	Carmil1
13	24315764	24329175	13412	1	4	3	1	seq_74915		12763	24327404	24477377	+	overlapStart	-11640	1771	nearest	Cmah
13	24329771	24341681	11911	1	4	1	4	seq_74916		12763	24327404	24477377	+	inside	2367	2367	nearest	Cmah
13	26755683	26765296	9614	1	4	2	1	seq_75234		15192	26768173	26770165	-	downstream	14482	2877	nearest	Hdgfl1
13	28207773	28219096	11324	1	0	4	3	seq_75409		28078	28142484	28151611	+	downstream	65289	56162	nearest	Prl5a1
13	28545208	28551146	5939	1	3	0	5	seq_75453		102466635	28710781	28710873	-	downstream	165665	159635	nearest	Mir6368
13	30459146	30468421	9276	3	3	1	1	seq_75701		66694	30540308	30545362	-	downstream	86216	71887	nearest	Uqcrfs1
13	31830191	31843189	12999	3	2	6	1	seq_75881		17300	31806633	31812476	+	downstream	23558	17715	nearest	Foxc1
13	34359929	34371017	11089	3	0	3	3	seq_76196		73102	34179158	34345182	-	upstream	-14747	14747	nearest	Slc22a23
13	35144033	35155025	10993	4	1	2	2	seq_76302		100503727	35167927	35188017	+	upstream	-23894	12902	nearest	1700011B04Rik
13	37003101	37011635	8535	2	1	5	2	seq_76553		74145	36867178	37050244	-	inside	47143	38609	nearest	F13a1
13	43085827	43098038	12212	4	1	2	1	seq_77375		67046	43151740	43171501	-	downstream	85674	53702	nearest	Tbc1d7
13	43229545	43241279	11735	1	2	3	2	seq_77398		67046	43151740	43171501	-	upstream	-58044	58044	nearest	Tbc1d7
13	43427194	43437355	10162	1	2	3	2	seq_77428		70078	43398390	43407097	+	downstream	28804	20097	nearest	Nol7
13	44162071	44179807	17737	6	1	3	2	seq_77533		100503592	44185760	44216487	-	downstream	54416	5953	nearest	A330076C08Rik
13	47923885	47935250	11366	2	4	2	0	seq_78039		619327	47910435	47934301	+	overlapEnd	13450	949	nearest	G630093K05Rik
13	49698484	49708234	9751	2	1	4	2	seq_78285		105148	49682100	49734267	+	inside	16384	16384	nearest	Iars
13	52151351	52161262	9912	2	0	5	1	seq_78631		74050	52096741	52124158	+	downstream	54610	27193	nearest	4921525O09Rik
13	53354411	53365023	10613	5	2	0	3	seq_78788		268656	53332748	53377397	-	inside	22986	12374	nearest	Sptlc1
13	53737976	53751175	13200	2	3	1	2	seq_78846		75252	53648585	53650080	+	downstream	89391	87896	nearest	4930555G21Rik
13	54724413	54735643	11231	0	1	2	8	seq_78998		26913	54736671	54749874	-	downstream	25461	1028	nearest	Gprin1
13	57697503	57707902	10400	3	1	3	1	seq_79410		20745	57421195	57908332	-	inside	210829	200430	nearest	Spock1
13	57862035	57873192	11158	1	4	2	2	seq_79429		20745	57421195	57908332	-	inside	46297	35140	nearest	Spock1
13	60630928	60641262	10335	2	1	1	4	seq_79801		69635	60601947	60763191	+	inside	28981	28981	nearest	Dapk1
13	62028926	62037389	8464	3	0	5	0	seq_79992		630579	62129886	62236144	+	upstream	-100960	92497	nearest	Zfp808
13	64109985	64118732	8748	2	1	3	2	seq_80276		70484	64096308	64129368	-	inside	19383	10636	nearest	Slc35d2
13	68362822	68370396	7575	1	2	2	3	seq_80799		666272	68353364	68356825	-	upstream	-5997	5997	nearest	Gm8016
13	69764634	69774002	9369	2	1	4	1	seq_81000		76980	69702832	69739889	-	upstream	-24745	24745	nearest	Ube2ql1
13	71863712	71874398	10687	1	3	1	3	seq_81288		16371	71957921	71963723	-	downstream	100011	83523	nearest	Irx1
13	71914518	71923866	9349	3	1	1	3	seq_81295		16371	71957921	71963723	-	downstream	49205	34055	nearest	Irx1
13	72211797	72226974	15178	3	5	3	3	seq_81333		16371	71957921	71963723	-	upstream	-248074	248074	nearest	Irx1
13	73107813	73116551	8739	2	3	0	3	seq_81461		50916	73260479	73269608	+	upstream	-152666	143928	nearest	Irx4
13	73561102	73573791	12690	2	3	4	4	seq_81524		13162	73536747	73578672	+	inside	24355	4881	nearest	Slc6a3
13	74208905	74224536	15632	2	1	0	7	seq_81618		211446	74169488	74208732	-	upstream	-173	173	nearest	Exoc3
13	74525807	74533462	7656	3	4	1	3	seq_81658	^	235956	74480054	74493992	-	upstream	-31815	31815	nearest	Zfp825
13	86682851	86695108	12258	6	1	0	2	seq_83159		12867	86044816	86046904	-	upstream	-635947	635947	nearest	Cox7c
13	90243921	90253007	9087	1	1	4	3	seq_83565		108138	89774027	90089608	-	upstream	-154313	154313	nearest	Xrcc4
13	94008218	94020728	12511	3	2	1	2	seq_84079	^	218454	94057796	94195409	+	upstream	-49578	37068	nearest	Lhfpl2
13	94962165	94975148	12984	2	2	2	3	seq_84195		218460	94976344	95023314	+	upstream	-14179	1196	nearest	Wdr41
13	96098549	96107737	9189	1	3	0	4	seq_84346		75209	95954594	96132577	-	inside	34028	24840	nearest	Sv2c
13	97477410	97487351	9942	2	2	4	2	seq_84525		100039691	97434970	97497007	+	inside	42440	9656	nearest	Lncenc1
13	99659527	99680078	20552	4	2	4	5	seq_84829		17755	99421446	99516540	-	upstream	-142987	142987	nearest	Map1b
13	99970622	99982717	12096	1	0	1	6	seq_84868		78038	99948530	100015639	-	inside	45017	22092	nearest	Mccc2
13	100298661	100317578	18918	3	3	3	3	seq_84902		17952	100281121	100317674	-	inside	19013	96	nearest	Naip6
13	103971362	103983145	11784	2	4	1	2	seq_85391		59079	103818787	103920514	-	upstream	-50848	50848	nearest	Erbin
13	104594099	104607175	13077	2	1	5	2	seq_85466		67288	104792484	104839274	+	upstream	-198385	185309	nearest	Srek1ip1
13	104860143	104872455	12313	4	0	1	4	seq_85497		77803	104845283	104863893	-	overlapStart	3750	3750	nearest	Shisal2b
13	110059898	110074453	14556	2	1	5	2	seq_86201		100316683	109903809	109903888	+	downstream	156089	156010	nearest	Mir1904
13	110922367	110931786	9420	0	2	1	5	seq_86322		102636142	110882852	110903846	-	upstream	-18521	18521	nearest	4930526H09Rik
13	119594887	119606103	11217	15	12	18	24	seq_87405	^	56838	119623819	119654359	+	upstream	-28932	17716	nearest	Ccl28
14	4354539	4362680	8142	2	1	3	2	seq_87606		554327	4334763	4354688	+	overlapEnd	19776	149	nearest	2610042L04Rik
14	5928999	5938349	9351	1	1	1	5	seq_87736		100041515	5438065	5807982	-	upstream	-121017	121017	nearest	Gm3383
14	6293959	6306373	12415	1	2	2	4	seq_87783	^	100861615	6259747	6287250	-	upstream	-6709	6709	nearest	LOC100861615
14	8332910	8344033	11124	0	3	4	1	seq_88016		268709	8296274	8318023	-	upstream	-14887	14887	nearest	Fam107a
14	8936613	8946228	9616	4	1	1	2	seq_88108		74859	8666386	8673378	+	downstream	270227	263235	nearest	4930455B14Rik
14	13597983	13606696	8714	4	0	1	3	seq_88744		218739	13670876	13683148	+	upstream	-72893	64180	nearest	Sntn
14	14647810	14654157	6348	1	1	3	3	seq_88896		218756	14702279	14799940	+	upstream	-54469	48122	nearest	Slc4a7
14	17273151	17283543	10393	3	2	2	1	seq_89243		100417973	17105561	17105876	+	downstream	167590	167275	nearest	Pou5f1-rs6
14	17843313	17854006	10694	2	2	3	1	seq_89319		21834	17660261	18038090	+	inside	183052	183052	nearest	Thrb
14	18070626	18079316	8691	3	0	3	2	seq_89349		353187	18204054	18239127	-	downstream	168501	124738	nearest	Nr1d2
14	19040511	19048520	8010	2	1	3	2	seq_89489		218793	18573575	18894267	-	upstream	-146244	146244	nearest	Ube2e2
14	19412829	19420664	7836	118	81	107	109	seq_89540	^	432825	19594139	19602581	-	downstream	189752	173475	nearest	Gm5458
14	19780219	19795032	14814	2	4	3	3	seq_89571		68045	19811351	19823824	-	downstream	43605	16319	nearest	Rtraf
14	22361802	22368297	6496	2	2	2	3	seq_89922		74896	22507174	22542823	-	downstream	181021	138877	nearest	4930405A10Rik
14	23347461	23356074	8614	0	3	2	3	seq_90055		791307	23038194	23094571	-	upstream	-252890	252890	nearest	Gm10248
14	24010920	24019302	8383	3	2	1	3	seq_90138		16531	23289431	24014491	-	overlapStart	3571	3571	nearest	Kcnma1
14	24745435	24757553	12119	3	1	2	3	seq_90238		20088	24487125	24496959	+	downstream	258310	248476	nearest	Rps24
14	26737928	26744757	6830	3	0	1	4	seq_90458		110083	26693274	26891703	+	inside	44654	44654	nearest	Dnah12
14	28280969	28289104	8136	5	2	2	0	seq_90671		22418	28504750	28527448	+	upstream	-223781	215646	nearest	Wnt5a
14	28527989	28536629	8641	1	0	5	3	seq_90709		22418	28504750	28527448	+	downstream	23239	541	nearest	Wnt5a
14	30041331	30055836	14506	3	2	2	4	seq_90916		218865	30009023	30040527	+	downstream	32308	804	nearest	Chdh
14	31447553	31454286	6734	1	1	5	1	seq_91117		24056	31359880	31436078	-	upstream	-11475	11475	nearest	Sh3bp5
14	33068438	33076985	8548	1	3	2	3	seq_91339		67580	32991382	33015291	+	downstream	77056	53147	nearest	Lrrc18
14	34114462	34127021	12560	3	2	3	3	seq_91478		105518	34051126	34102754	-	upstream	-11708	11708	nearest	A630023A22Rik
14	35173679	35180296	6618	3	0	2	3	seq_91612		723847	34894609	34894706	+	downstream	279070	278973	nearest	Mir346
14	35733062	35743096	10035	3	2	2	2	seq_91685		239036	35809488	35811978	-	downstream	78916	66392	nearest	4930596D02Rik
14	38300977	38311157	10181	4	2	3	0	seq_92020		75170	38898302	38958794	+	upstream	-597325	587145	nearest	Nrg3os
14	39663086	39670848	7763	1	3	3	1	seq_92213		73591	39655663	39685293	+	inside	7423	7423	nearest	1700109I08Rik
14	41453607	41458449	4843	4	2	2	0	seq_92461	^	100041722	41573211	41581305	+	upstream	-119604	114762	nearest	1700049E17Rik2
14	41521878	41529951	8074	5	1	1	3	seq_92471	^	100041722	41573211	41581305	+	upstream	-51333	43260	nearest	1700049E17Rik2
14	43248119	43280189	32071	9	4	10	11	seq_92660	^	108168154	43275036	43306011	+	overlapStart	-26917	5153	nearest	Gm9732
14	43309010	43321580	12571	4	2	2	4	seq_92666	^	71826	43342383	43347811	-	downstream	38801	20803	nearest	1700001F09Rik
14	43322160	43343904	21745	12	5	8	8	seq_92667	^	71826	43342383	43347811	-	overlapEnd	25651	1521	nearest	1700001F09Rik
14	43357628	43367281	9654	2	3	1	3	seq_92670	^	71826	43342383	43347811	-	upstream	-9817	9817	nearest	1700001F09Rik
14	44585544	44599078	13535	4	1	1	3	seq_92818		385138	44492463	44506345	+	downstream	93081	79199	nearest	BC061237
14	45430079	45438084	8006	1	3	1	3	seq_92924		54342	45376334	45404913	-	upstream	-25166	25166	nearest	Gnpnat1
14	45736937	45744225	7289	3	1	4	0	seq_92961	^	114874	45588467	45658143	-	upstream	-78794	78794	nearest	Ddhd1
14	49221692	49229209	7518	1	3	1	3	seq_93421		67082	49219588	49245474	-	inside	23782	2104	nearest	ccdc198
14	50910490	50925674	15185	2	2	5	3	seq_93641		11792	50924968	50927139	+	overlapStart	-14478	706	nearest	Apex1
14	51234321	51241936	7616	2	2	0	4	seq_93686		93726	51255262	51256112	-	downstream	21791	13326	nearest	Rnase2a
14	51572548	51583287	10740	2	2	2	2	seq_93732		434459	51552790	51662953	+	inside	19758	19758	nearest	Gm5622
14	51711323	51720603	9281	2	2	0	4	seq_93747		545047	51711643	51717183	-	includeFeature	5860	320	nearest	Gm5800
14	55300906	55309968	9063	2	5	1	0	seq_94176		71412	55222007	55241435	+	downstream	78899	59471	nearest	Dhrs2
14	55388701	55398605	9905	0	1	1	6	seq_94188		28200	55478758	55490340	+	upstream	-90057	80153	nearest	Dhrs4
14	56011971	56021709	9739	1	3	2	3	seq_94270		17224	56017971	56020384	+	includeFeature	-6000	1325	nearest	Mcpt1
14	56621440	56632216	10777	0	3	3	3	seq_94345		102635191	56607261	56620513	-	upstream	-927	927	nearest	Gm16573
14	57982006	57991059	9054	3	2	2	1	seq_94514		68514	57916261	57999262	-	inside	17256	8203	nearest	Micu2
14	58330798	58338089	7292	1	4	1	2	seq_94558		14180	58070547	58112720	+	downstream	260251	218078	nearest	Fgf9
14	58925678	58935867	10190	0	2	3	3	seq_94642		67932	59133040	59142893	-	downstream	217215	197173	nearest	1700129C05Rik
14	59359036	59369899	10864	2	2	2	2	seq_94697		219132	59347407	59365470	-	overlapStart	6434	4429	nearest	Phf11d
14	59917270	59927545	10276	3	3	2	0	seq_94780		50769	59638540	60197179	-	inside	279909	269634	nearest	Atp8a2
14	60845214	60857311	12098	5	1	1	2	seq_94904		70478	60784573	60905478	+	inside	60641	48167	nearest	Mipep
14	62769592	62781200	11609	2	2	2	6	seq_95172		18130	62676330	62761169	-	upstream	-8423	8423	nearest	Ints6
14	62928212	62939968	11757	4	1	0	4	seq_95188		432867	62977524	62984510	-	downstream	56298	37556	nearest	Defb48
14	66082729	66092310	9582	0	1	7	0	seq_95619		11495	66027329	66077733	-	upstream	-4996	4996	nearest	Adam2
14	68312884	68332037	19154	2	2	4	4	seq_95920		18040	68082590	68124846	-	upstream	-188038	188038	nearest	Nefm
14	70192914	70199647	6734	1	0	6	2	seq_96110		20410	70180468	70211989	-	inside	19075	12342	nearest	Sorbs3
14	71892853	71905484	12632	2	2	4	3	seq_96351		74667	71856702	71920439	+	inside	36151	14955	nearest	4930434J06Rik
14	72456162	72463999	7838	4	0	3	1	seq_96433		319448	72537946	72710003	-	downstream	253841	73947	nearest	Fndc3a
14	74818047	74829071	11025	3	0	2	3	seq_96748		13885	74732297	74750765	+	downstream	85750	67282	nearest	Esd
14	75673292	75685017	11726	1	2	2	3	seq_96859		75272	75642249	75696717	+	inside	31043	11700	nearest	Erich6b
14	76113531	76125241	11711	2	3	1	3	seq_96925		27275	76110891	76137379	+	inside	2640	2640	nearest	Nufip1
14	77259273	77267509	8237	2	0	5	1	seq_97087		239188	77156763	77721760	+	inside	102510	102510	nearest	Enox1
14	86174769	86184669	9901	1	2	3	2	seq_98191		75155	86245970	86283688	+	upstream	-71201	61301	nearest	4930529K09Rik
14	86356880	86364922	8043	5	0	2	1	seq_98210		75155	86245970	86283688	+	downstream	110910	73192	nearest	4930529K09Rik
14	99794265	99806593	12329	1	3	2	3	seq_99768		16597	99870632	100284679	-	downstream	490414	64039	nearest	Klf12
14	104847862	104858387	10526	1	0	5	2	seq_100430		320249	104612791	104966783	+	inside	235071	108396	nearest	D130009I18Rik
14	110802774	110812720	9947	2	1	3	2	seq_101134		239250	110748580	110755149	-	upstream	-47625	47625	nearest	Slitrk6
14	114057245	114066784	9540	2	2	1	3	seq_101500		75822	114831965	114861327	+	upstream	-774720	765181	nearest	4930524C18Rik
14	117388332	117403085	14754	1	4	3	1	seq_101913		23888	116925315	117976544	+	inside	463017	463017	nearest	Gpc6
14	118117680	118127966	10287	2	1	2	3	seq_102011		76355	118111911	118132755	-	inside	15075	4789	nearest	Tgds
14	118537793	118549204	11412	3	1	3	1	seq_102067		102465208	118592369	118592472	-	downstream	54679	43165	nearest	Mir6391
14	119501986	119509218	7233	1	3	3	1	seq_102203		75432	119749225	119751564	+	upstream	-247239	240007	nearest	1700006F04Rik
14	120323575	120332347	8773	2	0	2	4	seq_102314		105559	120275669	120431697	+	inside	47906	47906	nearest	Mbnl2
14	120346007	120355920	9914	1	3	2	2	seq_102315		105559	120275669	120431697	+	inside	70338	70338	nearest	Mbnl2
14	121036836	121049865	13030	3	1	2	2	seq_102407		223254	121035200	121283744	+	inside	1636	1636	nearest	Farp1
14	121944000	121951532	7533	1	3	2	2	seq_102519		321019	121952551	121965195	-	downstream	21195	1019	nearest	Gpr183
14	122016005	122024912	8908	3	4	0	1	seq_102527		223262	122034674	122038420	+	upstream	-18669	9762	nearest	Timm8a2
15	3808528	3822519	13992	2	1	3	2	seq_102963	^	106052	3965445	3979573	-	downstream	171045	142926	nearest	Fbxo4
15	10358112	10372720	14609	3	2	1	4	seq_103774		268782	10358532	10410153	+	overlapStart	-420	420	nearest	Agxt2
15	11913036	11923658	10623	3	3	2	1	seq_103977	^	18162	11839896	11907287	-	upstream	-5749	5749	nearest	Npr3
15	12367070	12374065	6996	3	1	4	1	seq_104036		66629	12321450	12351591	+	downstream	45620	15479	nearest	Golph3
15	12398080	12409086	11007	2	1	1	4	seq_104040		66629	12321450	12351591	+	downstream	76630	46489	nearest	Golph3
15	12538739	12548326	9588	0	5	1	3	seq_104061		68070	12359711	12739924	-	inside	201185	179028	nearest	Pdzd2
15	15057179	15067545	10367	1	2	1	4	seq_104370	^	12565	16728756	16857094	+	upstream	-1671577	1661211	nearest	Cdh9
15	27871404	27881874	10471	1	1	3	5	seq_105899		223435	27730651	28025848	-	inside	154444	140753	nearest	Trio
15	28132747	28143726	10980	2	1	3	3	seq_105942		110082	28203752	28472052	+	upstream	-71005	60026	nearest	Dnah5
15	32404080	32410987	6908	0	1	2	5	seq_106467		20356	32244810	32696341	+	inside	159270	159270	nearest	Sema5a
15	42024862	42029634	4773	2	1	2	3	seq_107736		223513	41864076	41869720	-	upstream	-155142	155142	nearest	Abra
15	43875605	43882083	6479	2	0	4	2	seq_107964		239408	43864646	43870036	-	upstream	-5569	5569	nearest	Tmem74
15	46033274	46046013	12740	2	1	3	4	seq_108230		71120	46324559	46373907	+	upstream	-291285	278546	nearest	1700022A22Rik
15	50112576	50123445	10870	2	1	5	1	seq_108688		100316685	50889025	50889114	-	downstream	776538	765580	nearest	Mir1907
15	50513851	50525828	11978	0	4	2	2	seq_108736		100316685	50889025	50889114	-	downstream	375263	363197	nearest	Mir1907
15	51567482	51577287	9806	3	3	2	1	seq_108859		100502643	51231640	51395610	-	upstream	-171872	171872	nearest	Gm19303
15	56143400	56151282	7883	2	2	1	5	seq_109484		20649	55636388	55906949	-	upstream	-236451	236451	nearest	Sntb1
15	57830734	57844865	14132	2	3	4	3	seq_109707		67819	57869502	57892448	-	downstream	61714	24637	nearest	Derl1
15	58530226	58539734	9509	3	2	1	2	seq_109797		631797	58510048	58665092	+	inside	20178	20178	nearest	Fer1l6
15	60158268	60170953	12686	2	1	4	1	seq_110008	^	71088	60014866	60016613	-	upstream	-141655	141655	nearest	4933412E24Rik
15	62201424	62214189	12766	3	5	1	1	seq_110267		67552	62218221	62219332	-	downstream	17908	4032	nearest	H2afy3
15	67174705	67183863	9159	1	3	3	1	seq_110937		20442	67102875	67176830	-	overlapStart	2125	2125	nearest	St3gal1
15	69102113	69118977	16865	6	2	4	2	seq_111193		75076	69270533	69274720	+	upstream	-168420	151556	nearest	4930504C09Rik
15	70062729	70073537	10809	4	0	3	1	seq_111321		100503580	70011623	70077841	+	inside	51106	4304	nearest	Gm19782
15	70529720	70537283	7564	2	2	1	3	seq_111379		100503580	70011623	70077841	+	downstream	518097	451879	nearest	Gm19782
15	73840805	73848560	7756	1	0	5	2	seq_111843		268816	73760067	73839699	-	upstream	-1106	1106	nearest	Mroh5
15	74451263	74461950	10688	2	1	4	3	seq_111942		107831	74516195	74589465	+	upstream	-64932	54245	nearest	Adgrb1
15	75042902	75052431	9530	2	1	2	3	seq_112027	^	17067	75044018	75048830	-	includeFeature	5928	1116	nearest	Ly6c1
15	75084479	75088046	3568	10	7	14	18	seq_112031	^	100041546	75108158	75111970	-	downstream	27491	20112	nearest	Ly6c2
15	75214732	75228710	13979	1	1	2	6	seq_112049		223631	75216376	75222661	+	includeFeature	-1644	1644	nearest	Ly6g2
15	76602062	76609066	7005	4	1	1	2	seq_112245		94230	76595803	76607591	-	overlapStart	5529	1475	nearest	Cpsf1
15	77688496	77701270	12775	4	2	1	4	seq_112399		666348	77698857	77719285	+	overlapStart	-10361	2413	nearest	Apol7e
15	78136530	78146528	9999	2	1	3	2	seq_112453		12300	77991748	78120028	-	upstream	-16502	16502	nearest	Cacng2
15	79889156	79900382	11227	2	2	2	2	seq_112672	^	80287	79891659	79915906	+	overlapStart	-2503	2503	nearest	Apobec3
15	80673781	80683871	10091	3	1	2	2	seq_112772		213956	80671847	80700425	+	inside	1934	1934	nearest	Fam83f
15	81029652	81037212	7561	2	2	3	1	seq_112819		105835	80977765	81012290	+	downstream	51887	17362	nearest	Sgsm3
15	82260047	82267988	7942	2	3	0	3	seq_112976		24050	82268802	82294574	+	upstream	-8755	814	nearest	2003-09-01
15	85520397	85532653	12257	0	3	5	1	seq_113421		328577	85492736	85503227	-	upstream	-17170	17170	nearest	7530416G11Rik
15	86891345	86902925	11581	1	2	5	2	seq_113608		106014	87544299	87759364	+	upstream	-652954	641374	nearest	Tafa5
15	86971433	86987300	15868	4	2	1	3	seq_113621		106014	87544299	87759364	+	upstream	-572866	556999	nearest	Tafa5
15	87260945	87270974	10030	4	1	1	2	seq_113661		106014	87544299	87759364	+	upstream	-283354	273325	nearest	Tafa5
15	87704245	87717096	12852	3	1	4	2	seq_113717		102465209	87795850	87795943	-	downstream	91698	78754	nearest	Mir6393
15	88498985	88510241	11257	1	2	0	5	seq_113829		70073	88600302	88601669	+	upstream	-101317	90061	nearest	Zdhhc25
15	88909903	88919086	9184	2	0	5	1	seq_113887		239591	88890633	88954418	-	inside	44515	19270	nearest	Ttll8
15	93635784	93646364	10581	2	1	3	2	seq_114502		106042	93499114	93595891	-	upstream	-39893	39893	nearest	Prickle1
15	96117540	96127378	9839	0	3	1	5	seq_114831		402773	96051603	96079553	-	upstream	-37987	37987	nearest	D030018L15Rik
15	97628945	97640976	12032	1	1	3	3	seq_115029		71919	97675097	97705825	-	downstream	76880	34121	nearest	Rpap3
15	100170572	100179149	8578	1	2	3	2	seq_115357		11908	100227819	100261244	+	upstream	-57247	48670	nearest	Atf1
15	103174938	103184991	10054	3	1	3	2	seq_115755		71726	103153290	103167092	-	upstream	-7846	7846	nearest	Smug1
15	103881187	103891502	10316	2	1	0	5	seq_115822	^	20770	103895855	103899312	-	downstream	18125	4353	nearest	Mucl2
16	3230574	3249081	18508	4	10	13	10	seq_115847	^	258859	3592398	3593339	+	upstream	-361824	343317	nearest	Olfr161
16	4710485	4724674	14190	2	0	3	4	seq_116042		67824	4710059	4719356	-	overlapStart	8871	426	nearest	Nmral1
16	4762071	4775814	13744	1	3	3	1	seq_116048		66626	4750348	4790292	-	inside	28221	11723	nearest	Cdip1
16	5431667	5442151	10485	2	2	2	2	seq_116136		70511	5244152	5255983	-	upstream	-175684	175684	nearest	Eef2kmt
16	5496678	5504905	8228	5	0	2	2	seq_116144		70511	5244152	5255983	-	upstream	-240695	240695	nearest	Eef2kmt
16	9480805	9493026	12222	1	3	0	4	seq_116693		14811	9567898	9994923	-	downstream	514118	74872	nearest	Grin2a
16	10970343	10978922	8580	5	0	4	5	seq_116890	^	545180	10861755	10938364	-	upstream	-31979	31979	nearest	Gm21859
16	11016953	11027722	10770	3	2	1	2	seq_116896		20621	11060945	11074985	+	upstream	-43992	33223	nearest	Snn
16	11138220	11147167	8948	0	1	2	5	seq_116910	^	106200	11074911	11134650	-	upstream	-3570	3570	nearest	Txndc11
16	11822430	11831152	8723	2	1	2	3	seq_117018		73761	11778429	11781500	+	downstream	44001	40930	nearest	4833415N18Rik
16	12229076	12240611	11536	3	0	4	2	seq_117087		72555	11984113	12270902	+	inside	244963	30291	nearest	Shisa9
16	18114226	18125964	11739	1	2	2	3	seq_117907		65079	18127642	18152408	+	upstream	-13416	1678	nearest	Rtn4r
16	18222708	18235207	12500	0	4	2	4	seq_117925		27801	18220753	18235136	-	overlapStart	12428	71	nearest	Zdhhc8
16	18915818	18927183	11366	2	3	0	3	seq_118028		18100	18872018	18876862	-	upstream	-38956	38956	nearest	Mrpl40
16	18941941	18963327	21387	8	4	1	4	seq_118032	^	18100	18872018	18876862	-	upstream	-65079	65079	nearest	Mrpl40
16	19437911	19448471	10561	3	3	3	1	seq_118090		258458	19407039	19408078	-	upstream	-29833	29833	nearest	Olfr165
16	19592130	19603167	11038	3	1	2	4	seq_118109	^	258959	19605696	19606703	-	downstream	14573	2529	nearest	Olfr170
16	21320708	21332326	11619	1	2	4	4	seq_118330		76222	21331902	21333356	-	overlapEnd	12648	424	nearest	Magef1
16	23141405	23149913	8509	2	3	2	2	seq_118566		11450	23146536	23158028	+	overlapStart	-5131	3377	nearest	Adipoq
16	23896667	23904448	7782	4	1	1	3	seq_118672		20604	23889573	23890958	-	upstream	-5709	5709	nearest	Sst
16	26673025	26679728	6704	2	2	3	3	seq_119058		100504628	26714446	26755502	-	downstream	82477	34718	nearest	Gm20319
16	29711325	29723559	12235	2	3	2	2	seq_119440		74143	29579334	29654884	+	downstream	131991	56441	nearest	Opa1
16	29842865	29848534	5670	0	1	2	5	seq_119465		328657	29957927	29979184	-	downstream	136319	109393	nearest	Gm1968
16	33004247	33012212	7966	4	2	2	1	seq_119895		69707	33012683	33056218	-	downstream	51971	471	nearest	Iqcg
16	35099107	35112922	13816	1	1	5	4	seq_120183		224129	35154877	35305738	+	upstream	-55770	41955	nearest	Adcy5
16	35224686	35234477	9792	0	5	0	4	seq_120203		224129	35154877	35305738	+	inside	69809	69809	nearest	Adcy5
16	35931870	35943723	11854	1	2	4	2	seq_120298		209200	35926511	35939151	-	overlapStart	7281	4572	nearest	Dtx3l
16	38368518	38382731	14214	2	3	1	2	seq_120626		64082	38362209	38378216	+	overlapEnd	6309	4515	nearest	Popdc2
16	39722140	39735146	13007	0	2	4	3	seq_120807		268890	39984361	42181679	+	upstream	-262221	249215	nearest	Lsamp
16	45613206	45623447	10242	1	4	2	1	seq_121558		14525	45610380	45622867	+	overlapEnd	2826	580	nearest	Gcsam
16	47038570	47046847	8278	0	3	5	0	seq_121732		58998	46387706	46498525	-	upstream	-540045	540045	nearest	Nectin3
16	51524078	51534172	10095	2	3	1	2	seq_122314		629091	51980376	52005495	-	downstream	481417	446204	nearest	Gm29686
16	57388568	57392676	4109	1	4	2	2	seq_123030	^	78749	57353093	57573126	+	inside	35475	35475	nearest	Filip1l
16	62499585	62511701	12117	2	1	1	4	seq_123630		106338	62732444	62786818	-	downstream	287233	220743	nearest	Nsun3
16	65866268	65877063	10796	2	2	3	2	seq_124026		73569	65815257	65866368	+	overlapEnd	51011	100	nearest	Vgll3
16	77287417	77296374	8958	2	4	0	2	seq_125337		77994	77236317	77691403	+	inside	51100	51100	nearest	Mir99ahg
16	81495027	81506995	11969	2	0	2	4	seq_125815		17968	81200697	81626828	+	inside	294330	119833	nearest	Ncam2
16	84811097	84819409	8313	4	4	0	2	seq_126185		14390	84834925	84863779	+	upstream	-23828	15516	nearest	Gabpa
16	84986100	85003573	17474	3	2	3	3	seq_126206		100038614	84972214	84979451	+	downstream	13886	6649	nearest	Gm10791
16	87769775	87778569	8795	4	1	3	1	seq_126543		12013	87698945	87733346	+	downstream	70830	36429	nearest	Bach1
16	89890153	89902899	12747	3	1	4	1	seq_126799		21844	89787111	90143769	-	inside	253616	103042	nearest	Tiam1
16	90227065	90235913	8849	2	2	2	3	seq_126845		20655	90220754	90226329	+	downstream	6311	736	nearest	Sod1
16	92851002	92862643	11642	1	1	4	2	seq_127198		12394	92601466	92826149	-	upstream	-24853	24853	nearest	Runx1
16	94692126	94703958	11833	0	2	4	3	seq_127464		13548	94570010	94695517	+	overlapEnd	122116	3391	nearest	Dyrk1a
16	94767709	94780121	12413	5	1	1	1	seq_127476		13548	94570010	94695517	+	downstream	197699	72192	nearest	Dyrk1a
16	94983626	94993469	9844	3	2	2	1	seq_127506		16522	94748636	94997701	-	inside	14075	4232	nearest	Kcnj6
16	97043929	97055010	11082	0	1	6	1	seq_127786		13508	96590840	97170752	-	inside	126823	115742	nearest	Dscam
16	97949524	97964652	15129	1	4	3	2	seq_127922		114565	97947435	97962622	-	overlapStart	13098	2030	nearest	Zbtb21
17	3005825	3014006	8182	5	2	0	5	seq_127939	^	328734	3076578	3084183	-	downstream	78358	62572	nearest	Pisd-ps2
17	3014076	3025909	11834	3	3	2	6	seq_127940	^	328734	3076578	3084183	-	downstream	70107	50669	nearest	Pisd-ps2
17	3025993	3038762	12770	3	3	10	7	seq_127941	^	328734	3076578	3084183	-	downstream	58190	37816	nearest	Pisd-ps2
17	5329334	5340316	10983	2	1	2	3	seq_128265		106557	5417323	5418767	-	downstream	89433	77007	nearest	Ldhal6b
17	5546953	5557699	10747	3	2	3	2	seq_128295		224454	5492557	5753811	+	inside	54396	54396	nearest	Zdhhc14
17	7204642	7218869	14228	4	1	4	1	seq_128500		20112	7170115	7303315	+	inside	34527	34527	nearest	Rps6ka2
17	7291864	7308108	16245	2	2	5	4	seq_128513	^	21461	7324646	7345974	+	upstream	-32782	16538	nearest	Tcp10a
17	8462150	8476771	14622	3	3	4	2	seq_128656		20997	8434423	8442496	+	downstream	27727	19654	nearest	T
17	8638608	8646451	7844	2	2	3	2	seq_128682		23984	8525372	8986648	+	inside	113236	113236	nearest	Pde10a
17	8674333	8682048	7716	0	3	2	3	seq_128687		23984	8525372	8986648	+	inside	148961	148961	nearest	Pde10a
17	12526376	12536244	9869	1	1	1	5	seq_129177		20519	12418960	12507704	-	upstream	-18672	18672	nearest	Slc22a3
17	13175730	13197781	22052	8	4	4	4	seq_129258	^	100038394	13205042	13206209	+	upstream	-29312	7261	nearest	Gm10512
17	13209848	13238094	28247	8	9	5	11	seq_129261	^	236574	13230257	13237184	+	includeFeature	-20409	910	nearest	Smok2b
17	13304968	13316059	11092	4	6	5	3	seq_129263	^	100041352	13354572	13377223	+	upstream	-49604	38513	nearest	Tcp10c
17	13323533	13335695	12163	4	4	3	5	seq_129265	^	100041352	13354572	13377223	+	upstream	-31039	18877	nearest	Tcp10c
17	13344263	13358383	14121	2	4	4	5	seq_129268	^	100041352	13354572	13377223	+	overlapStart	-10309	3811	nearest	Tcp10c
17	13391992	13407112	15121	5	5	4	6	seq_129274	^	100041352	13354572	13377223	+	downstream	37420	14769	nearest	Tcp10c
17	13441987	13451528	9542	0	1	2	6	seq_129280	^	272667	13521456	13528433	+	upstream	-79469	69928	nearest	Smok4a
17	13451793	13460694	8902	1	3	0	4	seq_129281	^	272667	13521456	13528433	+	upstream	-69663	60762	nearest	Smok4a
17	13539979	13554197	14219	42	12	22	28	seq_129292	^	272667	13521456	13528433	+	downstream	18523	11546	nearest	Smok4a
17	13585247	13592613	7367	5	5	7	8	seq_129298	^	272667	13521456	13528433	+	downstream	63791	56814	nearest	Smok4a
17	14450551	14460562	10012	0	2	4	2	seq_129404		74917	14389113	14398942	-	upstream	-51609	51609	nearest	4930474M22Rik
17	14812472	14823517	11046	0	2	5	1	seq_129455		21826	14665500	14694235	-	upstream	-118237	118237	nearest	Thbs2
17	19975448	19984463	9016	1	3	2	3	seq_130101		22313	20028418	20048336	-	downstream	72888	43955	nearest	Vmn2r104
17	23512933	23523608	10676	5	2	0	5	seq_130569	^	320020	23550799	23565291	+	upstream	-37866	27191	nearest	6330415G19Rik
17	24864386	24873469	9084	0	1	3	4	seq_130734		16005	24865997	24882010	+	overlapStart	-1611	1611	nearest	Igfals
17	25470243	25478213	7971	2	1	3	2	seq_130820		71840	25454615	25476602	+	overlapEnd	15628	1611	nearest	Tekt4
17	26209828	26227153	17326	1	4	3	3	seq_130911		14570	26199183	26207786	-	upstream	-2042	2042	nearest	Arhgdig
17	26301197	26313647	12451	3	1	0	5	seq_130918		66978	26252896	26285504	+	downstream	48301	15693	nearest	Luc7l
17	26410603	26419775	9173	1	0	4	4	seq_130933		240055	26414829	26446349	+	overlapStart	-4226	4226	nearest	Neurl1b
17	29101331	29110145	8815	6	0	3	1	seq_131291	^	442827	29114145	29148980	+	upstream	-12814	4000	nearest	Rab44
17	30437382	30447098	9717	2	2	1	4	seq_131470		623169	30395620	30396033	-	upstream	-41349	41349	nearest	Gm6402
17	31765717	31778795	13079	4	1	3	2	seq_131647		17691	31844250	31855804	-	downstream	90087	65455	nearest	Sik1
17	31979811	31989796	9986	1	4	2	1	seq_131674		72462	32036100	32062865	+	upstream	-56289	46304	nearest	Rrp1b
17	32309409	32317208	7800	3	1	1	3	seq_131716		56399	32303672	32321238	-	inside	11829	4030	nearest	Akap8
17	37663294	37673060	9767	0	2	2	4	seq_132410		404308	37672025	37672990	+	includeFeature	-8731	70	nearest	Olfr118
17	38544750	38555618	10869	3	0	3	2	seq_132512		100126773	38554192	38560621	+	overlapStart	-9442	1426	nearest	Esp34
17	39841996	39849337	7342	27	16	26	25	seq_132684	^	100861531	39843013	39848788	+	includeFeature	-1017	549	nearest	Rn45s
17	41389628	41398909	9282	3	1	2	2	seq_132881		83815	40923051	40935047	-	upstream	-454581	454581	nearest	Cenpq
17	43044789	43057209	12421	5	2	3	0	seq_133105		94185	43016555	43089189	+	inside	28234	28234	nearest	Tnfrsf21
17	44760497	44772002	11506	0	3	4	2	seq_133332		109115	44777152	45119290	+	upstream	-16655	5150	nearest	Supt3
17	45432411	45442078	9668	3	3	2	3	seq_133416		105246278	45433598	45442544	+	overlapStart	-1187	466	nearest	B230354K17Rik
17	45921184	45928034	6851	1	2	3	2	seq_133476		75154	45879850	45881452	-	upstream	-39732	39732	nearest	4930542M03Rik
17	48310316	48324275	13960	3	1	5	0	seq_133799		320148	48316141	48327024	+	overlapStart	-5825	2749	nearest	B430306N03Rik
17	48655825	48675256	19432	3	3	3	2	seq_133845		76589	48454901	48539714	+	downstream	200924	116111	nearest	Unc5cl
17	49792111	49799685	7575	2	2	2	2	seq_133997		319991	49615136	49909847	+	inside	176975	110162	nearest	Kif6
17	49923676	49932368	8693	2	1	3	2	seq_134014		76438	49992257	50190674	-	downstream	266998	59889	nearest	Rftn1
17	50662992	50675081	12090	1	0	5	3	seq_134114		224860	50509403	50688484	+	inside	153589	13403	nearest	Plcl2
17	51303547	51316913	13367	3	2	3	2	seq_134187		328837	51425209	51435838	-	downstream	132291	108296	nearest	C330011F03Rik
17	53046394	53056272	9879	0	5	2	2	seq_134422	^	211482	53398889	53463321	-	downstream	416927	342617	nearest	Efhb
17	56662333	56673585	11253	2	2	3	3	seq_134893		71810	56673294	56711764	+	overlapStart	-10961	291	nearest	Ranbp3
17	58129995	58140053	10059	3	2	4	0	seq_135076		620292	57769570	58410355	+	inside	360425	270302	nearest	Cntnap5c
17	58702730	58715100	12371	3	1	2	2	seq_135153		69239	58878808	58991375	-	downstream	288645	163708	nearest	Pdzph1
17	66058391	66068706	10316	3	0	2	3	seq_136050		106585	65965698	66077089	-	inside	18698	8383	nearest	Ankrd12
17	72021079	72032641	11563	0	1	5	2	seq_136823		78785	71768473	71864273	+	downstream	252606	156806	nearest	Clip4
17	72463552	72473645	10094	3	0	2	3	seq_136887		11682	71868972	72604627	-	inside	141075	130982	nearest	Alk
17	72729223	72737435	8213	2	1	3	3	seq_136922		383295	72836453	72851195	+	upstream	-107230	99018	nearest	Ypel5
17	73666183	73678469	12287	3	1	4	0	seq_137055		71685	73493228	73710453	-	inside	44270	31984	nearest	Galnt14
17	75935590	75946628	11039	2	2	3	1	seq_137376		100043885	75861023	75889039	+	downstream	74567	46551	nearest	Gm4710
17	83248755	83258798	10044	3	3	1	2	seq_138308		106522	83215292	83225070	+	downstream	33463	23685	nearest	Pkdcc
17	84757945	84768537	10593	1	0	3	4	seq_138515		72416	84705247	84790789	-	inside	32844	22252	nearest	Lrpprc
17	85689248	85699055	9808	3	3	1	3	seq_138632		20472	85684277	85688274	-	upstream	-974	974	nearest	Six2
17	86609270	86623603	14334	4	2	1	2	seq_138767		13819	86753700	86833410	+	upstream	-144430	130097	nearest	Epas1
17	87910040	87922847	12808	3	2	3	2	seq_138945		17688	87975062	87990892	+	upstream	-65022	52215	nearest	Msh6
18	3003669	3007116	3448	5	3	4	6	seq_139805	^	100312476	3122492	3123412	-	downstream	119743	115376	nearest	Vmn1r238
18	3008662	3013826	5165	2	2	2	3	seq_139806	^	100312476	3122492	3123412	-	downstream	114750	108666	nearest	Vmn1r238
18	5803111	5814655	11545	1	3	3	2	seq_140174		791318	5491503	5593505	-	upstream	-209606	209606	nearest	Gm10125
18	10960686	10971456	10771	2	1	4	1	seq_140872		14465	11052064	11085635	+	upstream	-91378	80608	nearest	Gata6
18	13370456	13377415	6960	2	0	2	4	seq_141184		225192	13006990	13022882	+	downstream	363466	347574	nearest	Hrh4
18	27620836	27632362	11527	3	2	2	1	seq_143047		320624	28862850	28998176	+	upstream	-1242014	1230488	nearest	4930474G06Rik
18	30561905	30572348	10444	2	3	1	3	seq_143433		225326	30272747	30348126	+	downstream	289158	213779	nearest	Pik3c3
18	32402165	32411939	9775	3	1	1	3	seq_143674		402767	32359053	32378278	-	upstream	-23887	23887	nearest	A830052D11Rik
18	32540600	32549655	9056	2	2	3	1	seq_143689		71683	32528322	32560034	-	inside	19434	10379	nearest	Gypc
18	33182480	33191154	8675	1	1	5	1	seq_143772		170459	33199355	33213862	-	downstream	31382	8201	nearest	Stard4
18	33857082	33876571	19490	1	5	3	4	seq_143868		69749	33794892	33795986	+	downstream	62190	61096	nearest	Epb41l4aos
18	42599677	42612759	13083	5	3	1	1	seq_144988		240239	42577881	42579652	-	upstream	-20025	20025	nearest	Gpr151
18	43751736	43763162	11427	3	1	3	2	seq_145164		117158	43764289	43767399	+	upstream	-12553	1127	nearest	Scgb3a2
18	44607442	44618269	10828	0	4	3	3	seq_145271		626275	44661665	44676271	+	upstream	-54223	43396	nearest	A930012L18Rik
18	45522568	45531072	8505	2	3	2	1	seq_145389		140492	45268860	45686024	+	inside	253708	154952	nearest	Kcnn2
18	45995036	46006807	11772	2	3	0	4	seq_145449	^	107003	45683487	46045260	-	inside	50224	38453	nearest	A330093E20Rik
18	52561783	52576495	14713	4	3	2	0	seq_146292		16948	52516067	52529867	-	upstream	-31916	31916	nearest	Lox
18	53667687	53676528	8842	1	5	0	2	seq_146432		100502945	53639106	53705420	+	inside	28581	28581	nearest	Gm19466
18	56899014	56910492	11479	1	2	3	2	seq_146862		320253	56761716	56925548	-	inside	26534	15056	nearest	2003-03-01
18	62310898	62316414	5517	2	0	2	5	seq_147545		15562	62324204	62496577	+	upstream	-13306	7790	nearest	Htr4
18	64841291	64857209	15919	4	2	2	2	seq_147882		83814	64887705	65217828	+	upstream	-46414	30496	nearest	Nedd4l
18	70014148	70023211	9064	5	1	0	2	seq_148580		381175	69925426	69969484	+	downstream	88722	44664	nearest	Ccdc68
18	73071958	73084494	12537	2	1	3	3	seq_148994		240396	73573044	73592575	+	upstream	-501086	488550	nearest	Mex3c
18	74481273	74491693	10421	0	0	8	0	seq_149173		73606	74525140	74531124	-	downstream	49851	33447	nearest	1700120E14Rik
18	76444839	76453143	8305	4	1	2	2	seq_149447		17126	76241580	76310963	+	downstream	203259	133876	nearest	Smad2
18	76652618	76662508	9891	1	3	3	2	seq_149470		664805	76856405	76900342	+	upstream	-203787	193897	nearest	Skor2
18	78844585	78854582	9998	0	1	4	5	seq_149744		27411	78146148	78596942	-	upstream	-247643	247643	nearest	Slc14a2
18	81596115	81611075	14961	2	4	5	1	seq_150121		100628596	81992010	81992080	-	downstream	395965	380935	nearest	Mir5127
18	82158759	82171619	12861	7	3	9	2	seq_150201	^	100628596	81992010	81992080	-	upstream	-166679	166679	nearest	Mir5127
18	87924401	87935072	10672	2	1	2	6	seq_150928		54607	88668695	88927481	-	downstream	1003080	733623	nearest	Socs6
19	3219516	3226311	6796	2	2	2	2	seq_151287	^	70011	3053071	3197732	-	upstream	-21784	21784	nearest	1700030N03Rik
19	4909575	4921308	11734	3	1	1	5	seq_151512		52028	4886878	4906628	-	upstream	-2947	2947	nearest	Bbs1
19	8004062	8014091	10030	1	2	3	2	seq_151908		171405	7864388	7966027	-	upstream	-38035	38035	nearest	Slc22a27
19	8135099	8144375	9277	1	3	3	3	seq_151921		434674	8062209	8131982	-	upstream	-3117	3117	nearest	Slc22a28
19	8819863	8828659	8797	1	1	4	2	seq_152015		68693	8820010	8841137	+	overlapStart	-147	147	nearest	Hnrnpul2
19	8997176	9017878	20703	4	2	2	4	seq_152038		66395	8989284	9076914	+	inside	7892	7892	nearest	Ahnak
19	10282422	10290894	8473	2	1	2	4	seq_152201		269060	10245265	10304877	-	inside	22455	13983	nearest	Dagla
19	10849655	10856773	7119	3	2	0	3	seq_152276		65221	10842544	10859362	+	inside	7111	2589	nearest	Slc15a3
19	11171902	11183031	11130	1	2	4	1	seq_152320		69416	11139664	11165320	-	upstream	-6582	6582	nearest	Ms4a19
19	12932676	12945770	13095	3	2	1	2	seq_152540		258300	12934737	12935684	+	includeFeature	-2061	2061	nearest	Olfr1449
19	22935978	22947945	11968	4	5	2	1	seq_153808		387200	22750605	22750672	+	downstream	185373	185306	nearest	Mir204
19	25329850	25342033	12184	1	1	2	5	seq_154122		107351	25236975	25434496	+	inside	92875	92463	nearest	Kank1
19	25406242	25412797	6556	2	4	1	1	seq_154133		50796	25505618	25604329	+	upstream	-99376	92821	nearest	Dmrt1
19	26370985	26383451	12467	3	1	2	3	seq_154259		67155	26605050	26778322	+	upstream	-234065	221599	nearest	Smarca2
19	27251562	27260354	8793	3	1	3	1	seq_154387		22359	27216484	27254231	+	overlapEnd	35078	2669	nearest	Vldlr
19	27336356	27347059	10704	1	0	8	3	seq_154398		240595	27322588	27337179	+	overlapEnd	13768	823	nearest	Kcnv2
19	28473658	28482623	8966	4	1	0	3	seq_154549		320176	28678224	28720027	+	upstream	-204566	195601	nearest	D930032P07Rik
19	31704295	31715763	11469	3	1	2	2	seq_154955		19091	30564489	31765033	-	inside	60738	49270	nearest	Prkg1
19	33721744	33736325	14582	1	2	1	5	seq_155198		101055671	33719670	33751359	-	inside	29615	2074	nearest	Lipo2
19	37438392	37446497	8106	3	3	1	2	seq_155676		15242	37434810	37440731	+	overlapEnd	3582	2339	nearest	Hhex
19	38134813	38145500	10688	2	1	2	4	seq_155763		110855	38132781	38183958	+	inside	2032	2032	nearest	Pde6c
19	41635845	41644349	8505	1	1	3	4	seq_156212		102465884	41588651	41588789	+	downstream	47194	47056	nearest	Mir8091
19	41928029	41937286	9258	4	0	2	2	seq_156255		74168	41933480	41944104	+	overlapStart	-5451	3806	nearest	Zdhhc16
19	44511509	44520533	9025	4	1	2	2	seq_156604		22423	44493472	44514273	+	overlapEnd	18037	2764	nearest	Wnt8b
19	45254631	45263023	8393	4	0	1	3	seq_156701		16814	45232684	45235812	-	upstream	-18819	18819	nearest	Lbx1
19	46873443	46884647	11205	0	2	3	3	seq_156913		94219	46761596	46880192	+	overlapEnd	111847	4455	nearest	Cnnm2
19	47969942	47982806	12865	3	1	3	2	seq_157069		381229	47937675	48035387	+	inside	32267	32267	nearest	Cfap58
19	49147550	49157589	10040	5	1	2	1	seq_157222		66673	48206025	48805505	+	downstream	941525	342045	nearest	Sorcs3
19	54343532	54359031	15500	4	2	2	3	seq_157872		11551	54044151	54048982	+	downstream	299381	294550	nearest	Adra2a
19	57631089	57641585	10497	1	3	3	2	seq_158292	^	226255	57611034	58133343	+	inside	20055	20055	nearest	Atrnl1
19	58110691	58118325	7635	12	11	5	9	seq_158360	^	100885835	58051167	58051236	+	downstream	59524	59455	nearest	Mir5623
19	58151576	58161596	10021	0	4	1	3	seq_158366		100885835	58051167	58051236	+	downstream	100409	100340	nearest	Mir5623
19	59732380	59744224	11845	3	2	2	3	seq_158564		74998	59902884	59943654	-	downstream	211274	158660	nearest	Rab11fip2
X	31156634	31165052	8419	4	2	2	3	seq_312471	^	668963	4289286	31383886	-	inside	227252	218834	nearest	Btbd35f20
X	31166776	31187045	20270	3	3	6	7	seq_312472	^	668963	4289286	31383886	-	inside	217110	196841	nearest	Btbd35f20
X	31720892	31729118	8227	2	0	4	3	seq_312506	^	74851	31962044	31962821	+	upstream	-241152	232926	nearest	Spin2-ps1
X	31758192	31779422	21231	8	3	4	5	seq_312511	^	74851	31962044	31962821	+	upstream	-203852	182622	nearest	Spin2-ps1
X	33927038	33935039	8002	2	2	5	2	seq_312678	^	100040732	33700649	33702349	-	upstream	-224689	224689	nearest	Btbd35f14
X	51720399	51729929	9531	2	0	3	3	seq_314073		50786	51387212	51681856	-	upstream	-38543	38543	nearest	Hs6st2
X	76595451	76600138	4688	16	7	21	13	seq_315985	^	74987	76582610	76602924	-	inside	7473	2786	nearest	Cldn34d
X	143482004	143484110	2107	6	10	1	7	seq_321085	^	18481	143518591	143797796	+	upstream	-36587	34481	nearest	Pak3
X	169972227	169979877	7651	0	5	0	4	seq_323201	^	66747	169776257	169779635	-	upstream	-192592	192592	nearest	4933400A11Rik
Y	256826	267447	10622	9	2	3	6	seq_323222	^	22767	725128	797409	-	downstream	540583	457681	nearest	Zfy1
Y	90736337	90748235	11899	6	5	9	13	seq_325893	^	170942	90784738	90816465	+	upstream	-48401	36503	nearest	Erdr1
Y	90795877	90814959	19083	11	4	12	10	seq_325897	^	170942	90784738	90816465	+	inside	11139	1506	nearest	Erdr1
					Black flag: ^, intersecting unreliable black list regions
